# Supplementary material for: Organocatalytic asymmetric strategies to carbocyclic structures by γ-alkylation-annulation sequences
Source: Royal Society of Chemistry journal article supplement (doi:10.1039/c4cc06556e), 2014-09-17
Supplement: c4cc06556e1.pdf [file c4cc06556e1.pdf]

# Organocatalytic asymmetric strategies to carbocyclic structures by $\gamma$ -alkylation-annulation sequences

Bjarke S. Donslund, Kim Sørholm Halskov, Lars A. Leth, Bruno Matos Paz and Karl Anker Jørgensen\*

[\*] Center for Catalysis

Department of Chemistry, Aarhus University

DK-8000 Aarhus C, Denmark

Fax (45) 8715 5956, e-mail: [kaj@chem.au.dk](mailto:kaj@chem.au.dk)

## Contents

|                                                          |     |
|----------------------------------------------------------|-----|
| 1. General methods                                       | S2  |
| 2. Synthesis of starting materials                       | S3  |
| 2.1. Characterization data for enals <b>1</b>            | S3  |
| 3. General procedures for the organocatalytic reactions  | S6  |
| 3.1. Asymmetric formation of chiral carbocycles <b>5</b> | S6  |
| 3.2. Asymmetric formation of chiral carbocycles <b>7</b> | S11 |
| 4. X-Ray structures and crystal data                     | S14 |
| 5. NMR spectra of novel compounds                        | S17 |
| 6. UPC <sup>2</sup> traces                               | S50 |

## 1. General methods

NMR spectra were acquired on a Bruker AVANCE III HD spectrometer running at 400 MHz for  $^1\text{H}$ , 100 MHz for  $^{13}\text{C}$ , 376 MHz for  $^{19}\text{F}$  and 162 MHz for  $^{31}\text{P}$ , respectively. Chemical shifts ( $\delta$ ) are reported in ppm relative to residual solvent signals ( $\text{CHCl}_3$ , 7.26 ppm for  $^1\text{H}$  NMR,  $\text{CDCl}_3$ , 77.0 ppm for  $^{13}\text{C}$  NMR). For  $^{19}\text{F}$  NMR and  $^{31}\text{P}$  NMR internal standards of  $\text{CFCl}_3$  and 85%  $\text{H}_3\text{PO}_4$  were used, respectively. The following abbreviations are used to indicate the multiplicity in NMR spectra: s, singlet; d, doublet; t, triplet; q, quartet; quint, quintet; m, multiplet; bs, broad signal.  $^{13}\text{C}$  NMR spectra were acquired in broad band decoupled mode. Mass spectra were recorded on a Bruker MicroTOF-Q High Performance LC-MS system. Analytical thin layer chromatography (TLC) was performed using pre-coated aluminium-backed plates (Merck Kieselgel 60 F254) and visualized by ultraviolet radiation or  $\text{KMnO}_4$  stain. For flash chromatography (FC) silica gel (Silica gel 60, 230-400 mesh, Fluka) was used. Optical rotations were measured on a Bellingham+Stanley ADP440+ polarimeter,  $\alpha$  values are given in  $\text{deg}\cdot\text{cm}^3\cdot\text{g}^{-1}\cdot\text{dm}^{-1}$ ; concentration  $c$  in  $\text{g}\cdot(100\text{ ml})^{-1}$ . The enantiomeric excess (ee) of the products was determined by chiral stationary phase Waters ACQUITY UPC<sup>2</sup> (Daicel Chiralpak) or HPLC (Daicel Chiralcel IA column). Unless otherwise noted, gradient runs were performed with 100% supercritical  $\text{CO}_2$  for 30 s, then going from 99%  $\text{CO}_2$  to 60:40  $\text{CO}_2$ /solvent over 4 min. Reference samples for UPC<sup>2</sup> analysis were prepared using a mixture of product obtained from reactions with **3** and *ent*-**3**. Unless otherwise noted, analytical grade solvents and commercially available reagents were used without further purification.

## 2. Synthesis of starting materials

Enals **1** were synthesized from their corresponding ketones, which were commercially available *via* a Horner-Wadsworth-Emmons and DIBAL-H reduction sequence according to the procedures previously reported.<sup>1</sup> Electrophiles **2** were synthesized according to procedures previously reported.<sup>2</sup> Catalyst **3a** was purchased from commercial sources. Catalyst **3b** was synthesized in accordance to literature procedures.<sup>3</sup> Nitrostyrenes **6** were purchased from commercial sources.

For characterization of *E/Z* mixtures, \* denotes minor isomer, + denotes overlap of signals from both isomers, while no signs denotes signals of major isomer. For compounds **1** <sup>13</sup>C NMR signals are only given for the major isomer. A majority of the enals **1** have already been described in previous publications,<sup>4</sup> however, for the benefit of the reader, characterization data for all enals **1** are provided.

### 2.1. Characterization data for enals **1**

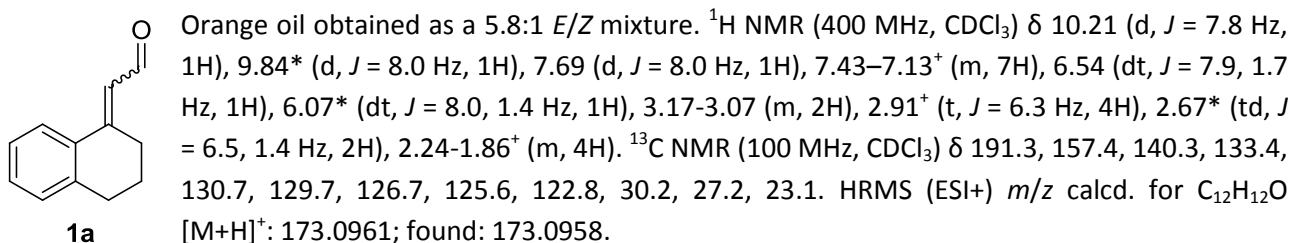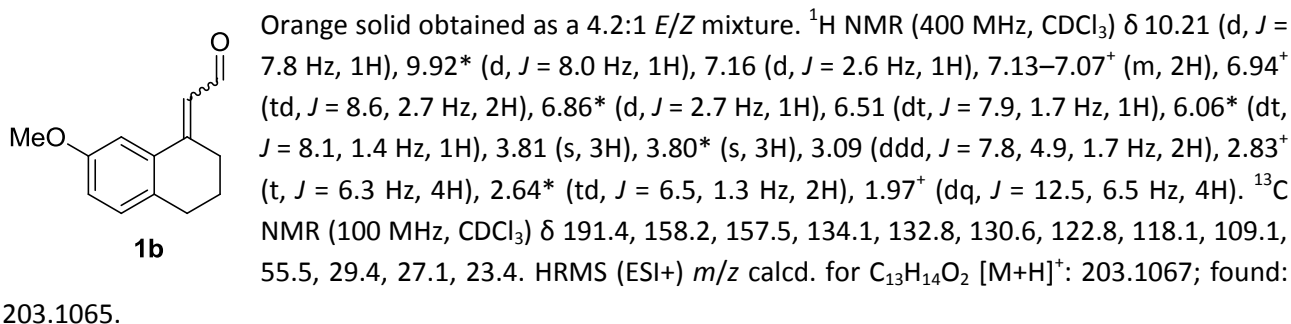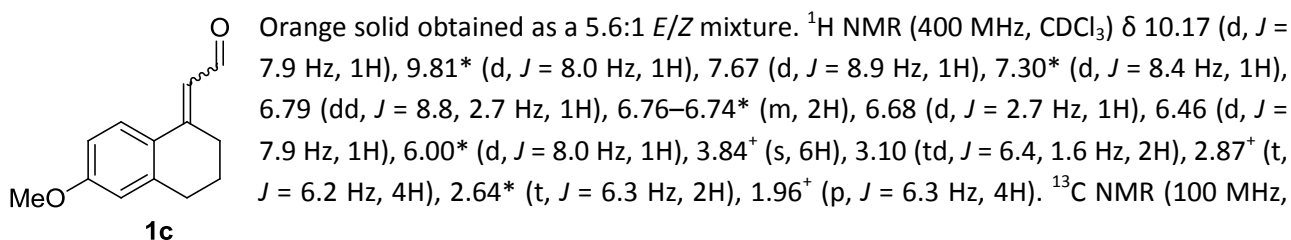

<sup>1</sup> H. Jiang, K. S. Halskov, T. K. Johansen and K. A. Jørgensen, *Chem.–Eur. J.*, 2011, **17**, 3842.

<sup>2</sup> Diethyl (3-oxo-3-phenylprop-1-en-2-yl)phosphonate (**2a**): C. De Fusco, T. Fuoco, A. Lattanzi and G. Croce, *Org. Lett.*, 2012, **14**, 4078; ethyl 2-(diethoxyphosphoryl)acrylate (**2b**): A. T. Biju, M. Padmanaban, N. E. Wurz and F. Glorius, *Angew. Chem., Int. Ed.*, 2011, **50**, 8412; tetraethyl ethene-1,1-diylbis(phosphonate) (**2c**) was purchased from commercial sources; diethyl (1-(phenylsulfonyl)vinyl)phosphonate (**2d**): W. Flitsch and W. Lubisch, *Chem. Ber.*, 1984, **117**, 1424.

<sup>3</sup> Ł. Albrecht, G. Dickmeiss, F. C. Acosta, C. Rodríguez-Esrich, R. L. Davis and K. A. Jørgensen, *J. Am. Chem. Soc.*, 2012, **134**, 2543.

<sup>4</sup> K. S. Halskov, B. S. Donslund, S. Barfüsser and K. A. Jørgensen, *Angew. Chem., Int. Ed.*, 2014, **53**, 4137.

CDCl<sub>3</sub>) δ 191.1, 161.6, 157.3, 142.5, 127.5, 126.0, 121.0, 113.8, 113.4, 55.5, 30.7, 27.2, 23.1. HRMS (ESI+) *m/z* calcd. for C<sub>13</sub>H<sub>14</sub>O<sub>2</sub> [M+H]<sup>+</sup>: 203.1067; found: 203.1067.

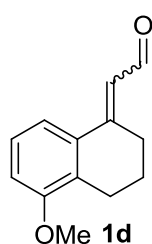

Orange solid obtained as a 3.3:1 *E/Z* mixture. <sup>1</sup>H NMR (400 MHz, CDCl<sub>3</sub>) δ 10.21 (d, *J* = 7.9 Hz, 1H), 9.89\* (d, *J* = 7.9 Hz, 1H), 7.29<sup>+</sup> (d, *J* = 8.1 Hz, 3H), 7.21<sup>+</sup> (t, *J* = 8.1 Hz, 3H), 6.53 (d, *J* = 7.9 Hz, 1H), 6.05\* (d, *J* = 8.1 Hz, 1H), 3.86\* (s, 3H), 3.85 (s, 3H), 3.08 (m, 2H), 2.85-2.78<sup>+</sup> (m, 4H), 2.61-2.55\* (m, 2H), 2.06\* (k, *J* = 6.4 Hz, 2H), 1.98 (k, *J* = 6.4 Hz, 2H). <sup>13</sup>C NMR (100 MHz, CDCl<sub>3</sub>) δ 193.5\*, 191.2, 161.5\*, 158.1, 157.2, 157.1\*, 134.5, 134.0\*, 128.9, 128.2\*, 126.6, 126.0\*, 125.9\*, 123.3\*, 123.1, 117.4, 111.7\*, 111.4, 55.5, 55.4\*, 34.7\*, 26.5, 23.6\*, 23.2, 22.9\*, 22.5\*. HRMS (ESI+) *m/z* calcd. for C<sub>13</sub>H<sub>14</sub>O<sub>2</sub> [M+H]<sup>+</sup>: 203.1067; found: 203.1068.

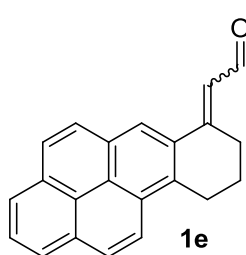

Orange solid obtained as a 5.7:1 *E/Z* mixture. <sup>1</sup>H NMR (400 MHz, CDCl<sub>3</sub>) δ 10.33 (d, *J* = 7.8 Hz, 1H), 10.00\* (d, *J* = 8.1 Hz, 1H), 8.46 (s, 1H), 8.33-7.95<sup>+</sup> (m, 15H), 6.88 (d, *J* = 7.8 Hz, 1H), 6.29\* (d, *J* = 8.1 Hz, 1H), 3.64-3.58<sup>+</sup> (m, 4H), 3.33-3.26 (m, 2H), 2.88-2.82\* (m, 2H), 2.39-2.24<sup>+</sup> (m, 4H). <sup>13</sup>C NMR (100 MHz, CDCl<sub>3</sub>) δ 191.1, 159.1, 133.3, 131.7, 131.3, 131.2, 129.7, 129.1, 128.1, 127.8, 127.4, 126.7, 125.9, 125.4, 125.3, 124.4, 124.0, 123.0, 122.0, 26.9, 26.6, 23.3. HRMS (ESI+) *m/z* calcd. for C<sub>22</sub>H<sub>16</sub>O [M+H]<sup>+</sup>: 297.1274; found: 297.1275.

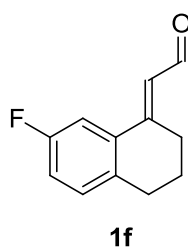

Yellow solid obtained as a single isomer. <sup>1</sup>H NMR (400 MHz, CDCl<sub>3</sub>) δ 10.19 (d, *J* = 7.7 Hz, 1H), 7.32 (dd, *J* = 10.5, 2.7 Hz, 1H), 7.13 (dd, *J* = 8.3, 5.8 Hz, 1H), 7.01 (dt, *J* = 8.3, 2.7 Hz, 1H), 6.42 (d, *J* = 7.7 Hz, 1H), 3.08 (t, *J* = 6.3 Hz, 2H), 2.84 (t, *J* = 6.3 Hz, 2H), 1.95 (k, *J* = 6.3 Hz, 2H). <sup>13</sup>C NMR (100 MHz, CDCl<sub>3</sub>) δ 190.9, 161.3 (d, *J* = 244.1 Hz), 155.7 (d, *J* = 3.3 Hz), 135.8 (d, *J* = 2.8 Hz), 134.7 (d, *J* = 7.0 Hz), 130.9 (d, *J* = 8.1 Hz), 123.0, 117.6 (d, *J* = 21.6 Hz), 111.4 (d, *J* = 22.0 Hz), 29.3, 26.6, 22.8. <sup>19</sup>F NMR (376 MHz, CDCl<sub>3</sub>): δ -115.68-(-115.78) (m). HRMS (ESI+) *m/z* calcd. for C<sub>12</sub>H<sub>11</sub>FO [M+H]<sup>+</sup>: 191.0867; found: 191.0868.

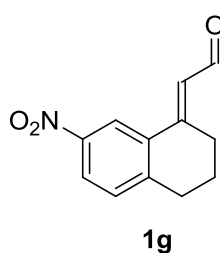

Yellow solid obtained as a single isomer. <sup>1</sup>H NMR (400 MHz, CDCl<sub>3</sub>): δ 10.24 (d, *J* = 7.3 Hz, 1H), 8.56 (d, *J* = 2.3 Hz, 1H), 8.15 (dd, *J* = 8.5; 2.3 Hz, 1H), 7.36 (d, *J* = 8.5 Hz, 1H), 6.62 (d, *J* = 7.3 Hz, 1H), 3.16 (t, *J* = 6.3 Hz, 2H), 3.00 (t, *J* = 6.3 Hz, 2H), 2.03 (k, *J* = 6.3 Hz, 2H). <sup>13</sup>C NMR (100 MHz, CDCl<sub>3</sub>): δ 190.7, 154.0, 147.1, 147.0, 134.8, 130.8, 124.5, 124.3, 120.7, 30.3, 26.7, 22.4. HRMS (ESI+) *m/z* calcd. for C<sub>12</sub>H<sub>11</sub>NO<sub>3</sub> [M+H]<sup>+</sup>: 218.0812; found: 218.0812

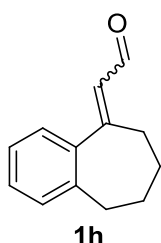

Orange oil obtained as a 3.1:1 *E/Z* mixture. <sup>1</sup>H NMR (400 MHz, CDCl<sub>3</sub>) δ 10.17 (d, *J* = 7.9 Hz, 1H), 9.44\* (d, *J* = 8.2 Hz, 1H), 7.30-7.10<sup>+</sup> (m, 8H), 6.18\* (d, *J* = 8.3 Hz, 1H), 6.08 (d, *J* = 8.0, 1H), 2.99 (t, *J* = 6.0 Hz, 2H), 2.85-2.79 (m, 2H), 2.77\* (t, *J* = 6.0 Hz, 2H), 2.00-1.72<sup>+</sup> (m, 10H). <sup>13</sup>C NMR (100 MHz, CDCl<sub>3</sub>) δ 191.3, 166.9, 139.8, 129.7, 129.2, 129.1, 128.2, 127.5, 126.7, 34.6, 30.1, 27.6, 26.6. HRMS (ESI+) *m/z* calcd. for C<sub>13</sub>H<sub>14</sub>O [M+H]<sup>+</sup>: 187.1117; found: 187.1118.

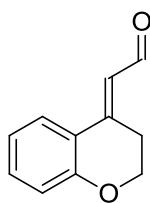**1i**

Yellow solid obtained as a single isomer.  $^1\text{H}$  NMR (400 MHz,  $\text{CDCl}_3$ )  $\delta$  10.13 (d,  $J = 7.5$  Hz, 1H), 7.62 (d,  $J = 8.0$ , 1H), 7.32 (t,  $J = 7.4$  Hz, 1H), 6.96 (t,  $J = 7.0$  Hz, 1H), 6.91 (d,  $J = 8.3$  Hz, 1H), 6.53 (d,  $J = 7.6$ , 1H), 4.31 (t,  $J = 6.0$  Hz, 2H), 3.25 (t,  $J = 6.0$  Hz, 2H).  $^{13}\text{C}$  NMR (100 MHz,  $\text{CDCl}_3$ )  $\delta$  190.1, 156.8, 150.1, 132.8, 125.3, 121.3, 119.9, 119.8, 118.2, 65.3, 26.0. HRMS (ESI+)  $m/z$  calcd. for  $\text{C}_{11}\text{H}_{10}\text{O}_2$   $[\text{M}+\text{H}]^+$ : 175.0754; found: 175.0754.

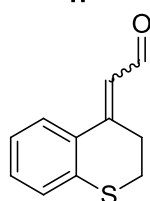**1j**

Orange solid obtained as a 5.6:1 *E/Z* mixture.  $^1\text{H}$  NMR (400 MHz,  $\text{CDCl}_3$ )  $\delta$  10.17 (d,  $J = 7.4$  Hz, 1H), 7.56 (dd,  $J = 8.0, 1.3$  Hz, 1H), 7.28–7.22 (m, 1H), 7.19 (dd,  $J = 7.9, 1.5$  Hz, 1H), 7.09–7.13 (m, 1H), 6.47 (d,  $J = 7.5$  Hz, 1H), 3.47–3.42 (m, 2H), 3.15–3.11 (m, 2H).  $^{13}\text{C}$  NMR (100 MHz,  $\text{CDCl}_3$ )  $\delta$  190.6, 154.2, 136.8, 132.0, 130.7, 127.9, 127.6, 125.1, 124.5, 27.1, 26.6. HRMS (ESI+)  $m/z$  calcd. for  $\text{C}_{11}\text{H}_{10}\text{OS}$   $[\text{M}+\text{H}]^+$ : 191.0525; found: 191.0527.

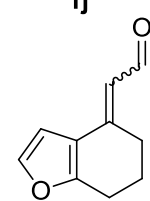**1k**

Brown solid obtained as a 2.1:1 *E/Z* mixture.  $^1\text{H}$  NMR (400 MHz,  $\text{CDCl}_3$ )  $\delta$  10.26\* (d,  $J = 8.5$  Hz, 1H), 10.08 (d,  $J = 8.2$  Hz, 1H), 7.36\* (d,  $J = 2.1$  Hz, 1H), 7.32 (d,  $J = 2.1$  Hz, 1H), 6.64\* (d,  $J = 2.1$  Hz, 1H), 6.51 (d,  $J = 2.1$  Hz, 1H), 6.09 (d,  $J = 8.2$  Hz, 1H), 5.82\* (d,  $J = 8.5$  Hz, 1H), 3.00–2.94 (m, 2H), 2.80<sup>+</sup> (t,  $J = 6.2$  Hz, 4H), 2.56–2.53\* (m, 2H), 2.05<sup>+</sup> (p,  $J = 6.3$  Hz, 4H).  $^{13}\text{C}$  NMR (100 MHz,  $\text{CDCl}_3$ )  $\delta$  190.2, 158.5, 152.9, 142.7, 120.8, 119.5, 106.4, 25.4, 23.7, 23.1. HRMS (ESI+)  $m/z$  calcd. for  $\text{C}_{10}\text{H}_{10}\text{O}_2$   $[\text{M}+\text{H}]^+$ : 163.0759; found: 163.0754.

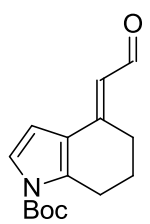**1l**

Orange solid obtained as a single isomer.  $^1\text{H}$  NMR (400 MHz,  $\text{CDCl}_3$ )  $\delta$  10.09 (d,  $J = 8.3$  Hz, 1H), 7.19 (d,  $J = 3.6$  Hz, 1H), 6.37 (d,  $J = 3.6$  Hz, 1H), 6.16 (d,  $J = 8.3$  Hz, 1H), 3.06 (t,  $J = 6.2$  Hz, 2H), 2.97–2.92 (m, 2H), 2.00 (p,  $J = 6.2$  Hz, 2H), 1.60 (s, 9H).  $^{13}\text{C}$  NMR (100 MHz,  $\text{CDCl}_3$ )  $\delta$  190.4, 154.3, 149.0, 137.6, 122.9, 122.0, 120.2, 107.0, 84.7, 28.2 (3C), 25.4, 25.0, 23.4. HRMS (ESI+)  $m/z$  calcd. for  $\text{C}_{15}\text{H}_{19}\text{NO}_3$   $[\text{M}+\text{H}]^+$ : 262.1443; found: 262.1439.

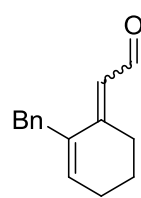**1m**

For synthesis, see previous reports.<sup>5</sup> The compound was obtained as a 9:1 *E/Z* mixture.  $^1\text{H}$  NMR (400 MHz,  $\text{CDCl}_3$ )  $\delta$  ppm 10.10 (d,  $J = 7.9$  Hz, 1H), 10.04\* (d,  $J = 8.4$  Hz, 1H), 7.32–7.11<sup>+</sup> (m, 10H), 6.11 (t,  $J = 4.5$  Hz, 1H), 6.01\* (t,  $J = 4.5$  Hz, 1H), 5.96 (d,  $J = 7.9$  Hz, 1H), 5.73\* (d,  $J = 8.4$  Hz, 1H), 3.83\* (s, 2H), 3.56 (s, 2H), 2.96–2.90 (m, 2H), 2.65–2.58\* (m, 1H), 2.46–2.41\* (m, 2H), 2.36–2.28<sup>+</sup> (m, 3H), 1.88–1.78<sup>+</sup> (m, 4H).  $^{13}\text{C}$  NMR (100 MHz,  $\text{CDCl}_3$ )  $\delta$  ppm 191.4, 156.0, 139.7, 139.1, 136.0, 128.5 (2C), 128.4 (2C), 126.2, 123.2, 39.1, 26.5, 26.1, 22.2. HRMS (ESI+)  $m/z$  calcd. for  $[\text{C}_{15}\text{H}_{16}\text{O}+\text{Na}]^+$ : 235.1093; found 235.1093.

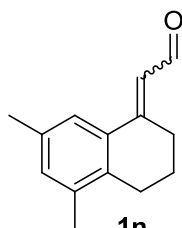**1n**

Yellow solid obtained as a 11.7:1 *E/Z* mixture.  $^1\text{H}$  NMR (400 MHz,  $\text{CDCl}_3$ )  $\delta$  10.19 (d,  $J = 8.0$  Hz, 1H), 9.85\* (d,  $J = 8.0$  Hz, 1H), 7.35 (s, 1H), 7.10\* (s, 1H), 7.07 (s, 1H), 6.99\* (s, 1H), 6.51 (d,  $J = 8.0$ , 1H), 6.04\* (d,  $J = 8.0$  Hz, 1H), 3.07–3.01 (m, 2H), 2.75<sup>+</sup> (t,  $J = 6.4$  Hz, 4H), 2.61–2.56\* (m, 2H), 2.32<sup>+</sup> (s, 6H), 2.24<sup>+</sup> (s, 6H), 2.12–2.05\* (m, 2H), 2.06–1.97 (m, 2H).  $^{13}\text{C}$  NMR (100 MHz,  $\text{CDCl}_3$ )  $\delta$  191.2, 159.0, 136.8, 135.4, 135.3, 133.5, 133.3, 123.8, 122.6, 26.6, 26.5, 23.1, 21.0, 19.5. HRMS (ESI+)  $m/z$  calcd. for  $\text{C}_{14}\text{H}_{16}\text{O}$   $[\text{M}+\text{H}]^+$ : 201.1274; found:

201.1276.

<sup>5</sup> K. S. Halskov, T. K. Johansen, R. L. Davis, M. Steurer, F. Jensen and K. A. Jørgensen, *J. Am. Chem. Soc.*, 2012, **134**, 12943.

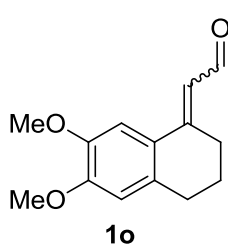

Orange solid obtained as a 5:1 *E/Z* mixture.  $^1\text{H}$  NMR (400 MHz,  $\text{CDCl}_3$ )  $\delta$  10.18 (d,  $J$  = 8.0 Hz, 1H), 7.15 (s, 1H), 6.63 (s, 1H), 6.45 (dt,  $J$  = 8.0, 1.6 Hz, 1H), 3.91 (s, 3H), 3.89 (s, 3H), 3.08 (ddd,  $J$  = 8.0, 4.9, 1.7 Hz, 2H), 2.84 (t,  $J$  = 6.2 Hz, 2H), 2.00–1.93 (m, 2H).  $^{13}\text{C}$  NMR (100 MHz,  $\text{CDCl}_3$ )  $\delta$  190.9, 157.1, 151.5, 147.7, 134.4, 125.1, 120.8, 111.3, 107.3, 55.9, 55.9, 29.8, 26.8, 23.1. HRMS (ESI+)  $m/z$  calcd. for  $\text{C}_{14}\text{H}_{16}\text{O}_3$   $[\text{M}+\text{H}]^+$ : 233.1178; found: 201.1177.

### 3. General procedures for the organocatalytic reactions

#### 3.1. Asymmetric formation of chiral carbocycles **5**

A glass vial equipped with a magnetic stirring bar was charged with enal **1** (0.10 mmol, 1.0 eq), catalyst **3a** (0.005 mmol, 0.05 eq),  $\text{PhCO}_2\text{H}$  (0.005 mmol, 0.05 eq) and  $\text{CHCl}_3$  (0.3 mL). Electrophile **2** (0.12 mmol, 1.2 eq) was then added and the mixture was stirred for 24 h at ambient temperature. The mixture was then diluted with 0.6 mL  $\text{CHCl}_3$  and 1.5 eq  $\text{Cs}_2\text{CO}_3$  was added. The mixture was stirred for 2 h at ambient temperature and subsequently subjected directly to FC on silica gel to yield product **5**.

For the following compounds altered conditions were applied: Compounds **5c,h** were synthesized with 10 mol% of **3a** and 10 mol%  $\text{PhCO}_2\text{H}$ . Compound **5e** was synthesized with a reaction time of 4 h for the second step. Compounds **5j,l** were synthesized with a reaction time of 48 h for the first step. Compound **5m** was synthesized with 20 mol% of **3a** and in the absence of  $\text{PhCO}_2\text{H}$ .

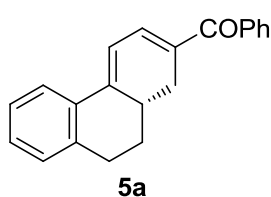

Isolated as a yellow oil by FC on silica gel using  $\text{Et}_2\text{O}$ /pentane 3:97 to 1:19 as eluent.  $[\alpha]_D^{22} = -488.2$  (c 0.5 in  $\text{CH}_2\text{Cl}_2$ ).  $^1\text{H}$  NMR (400 MHz,  $\text{CDCl}_3$ )  $\delta$  7.79–7.74 (m, 1H), 7.71–7.66 (m, 2H), 7.55–7.49 (m, 1H), 7.45 (t,  $J$  = 7.4 Hz, 2H), 7.25–7.14 (m, 3H), 6.86 (dd,  $J$  = 6.0, 2.7 Hz, 1H), 6.77 (dd,  $J$  = 6.2, 2.7 Hz, 1H), 3.04 (dd,  $J$  = 16.6, 7.1 Hz, 1H), 2.94–2.81 (m, 2H), 2.81–2.68 (m, 1H), 2.31–2.14 (m, 2H), 1.65 (qd,  $J$  = 12.2, 5.8 Hz, 1H).  $^{13}\text{C}$  NMR (100 MHz,  $\text{CDCl}_3$ )  $\delta$  196.6, 144.2, 139.4, 139.0, 138.7, 135.4, 132.1, 131.2, 129.5, 129.0 (2C), 128.6, 128.1 (2C), 126.4, 124.1, 116.2, 36.6, 30.5, 29.8, 29.8. HRMS (ESI+)  $m/z$  calcd. for  $\text{C}_{21}\text{H}_{18}\text{O}$   $[\text{M}+\text{H}]^+$ : 287.1430; found: 287.1429. UPC<sup>2</sup>: IB,  $\text{CO}_2$ /MeOH gradient, 3.0 mL·min<sup>-1</sup>;  $t_{\text{minor}} = 4.03$  min;  $t_{\text{major}} = 4.19$  min.

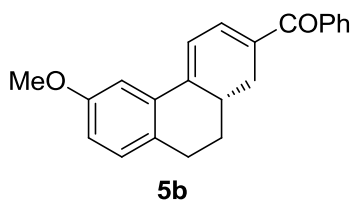

Isolated as a yellow oil by FC on silica gel using  $\text{Et}_2\text{O}$ /pentane 1:14 as eluent.  $[\alpha]_D^{22} = -318.7$  (c 0.2 in  $\text{CH}_2\text{Cl}_2$ ).  $^1\text{H}$  NMR (400 MHz,  $\text{CDCl}_3$ )  $\delta$  7.71–7.67 (m, 2H), 7.56–7.50 (m, 1H), 7.48–7.42 (m, 2H), 7.28–7.24 (m, 1H), 7.09 (d,  $J$  = 8.4 Hz, 1H), 6.88–6.81 (m, 2H), 6.73 (dd,  $J$  = 6.2, 2.7 Hz, 1H), 3.82 (s, 3H), 3.03 (dd,  $J$  = 16.6, 7.1 Hz, 1H), 2.89–2.64 (m, 3H), 2.30–2.13 (m, 2H), 1.68–1.54 (m, 1H).  $^{13}\text{C}$  NMR (100 MHz,  $\text{CDCl}_3$ )  $\delta$  196.7, 158.3, 144.3, 139.0, 138.8, 135.7, 133.1, 132.2, 131.4, 130.5, 129.1 (2C), 128.2 (2C), 116.6, 115.5, 108.5, 55.5, 36.6, 30.3, 30.0, 29.8. HRMS (ESI+)  $m/z$  calcd. for  $\text{C}_{22}\text{H}_{20}\text{O}_2$   $[\text{M}+\text{H}]^+$ : 317.1536; found: 317.1537. UPC<sup>2</sup>: IB,  $\text{CO}_2$ /*i*-PrOH gradient, 3.0 mL·min<sup>-1</sup>;  $t_{\text{major}} = 4.39$  min;  $t_{\text{minor}} = 4.17$  min.

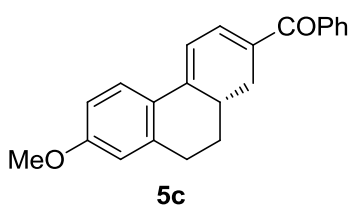

Isolated as a yellow oil by FC on silica gel using Et<sub>2</sub>O/pentane 1:9 as eluent.  $[\alpha]_D^{22} = -697.4$  (c 0.5 in CHCl<sub>3</sub>). <sup>1</sup>H NMR (400 MHz, CDCl<sub>3</sub>) δ 7.71 (d, *J* = 8.9 Hz, 1H), 7.69–7.63 (m, 2H), 7.54–7.48 (m, 1H), 7.47–7.40 (m, 2H), 6.85 (dd, *J* = 6.2, 2.7 Hz, 1H), 6.78 (dd, *J* = 8.9, 2.7 Hz, 1H), 6.67 (d, *J* = 2.7 Hz, 1H), 6.62 (dd, *J* = 6.2, 2.6 Hz, 1H), 3.83 (s, 3H), 3.03 (dd, *J* = 16.5, 7.1 Hz, 1H), 2.85 (dd, *J* = 8.7, 3.5 Hz, 2H), 2.77–2.63 (m, 1H), 2.28–2.12 (m, 2H), 1.71–1.55 (m, 1H).

<sup>13</sup>C NMR (100 MHz, CDCl<sub>3</sub>) δ 196.4, 160.0, 144.5, 141.2, 139.7, 138.9, 134.2, 131.0, 128.9 (2C), 128.0 (2C), 125.9, 125.1, 114.2, 113.4, 113.3, 55.3, 36.5, 30.8, 30.0, 29.7. HRMS (ESI+) *m/z* calcd. for C<sub>22</sub>H<sub>20</sub>O<sub>2</sub> [M+H]<sup>+</sup>: 317.1536; found: 317.1541. UPC<sup>2</sup>: IA, CO<sub>2</sub>/MeOH gradient, 3.0 mL·min<sup>-1</sup>; *t*<sub>minor</sub> = 5.81 min; *t*<sub>major</sub> = 6.14 min.

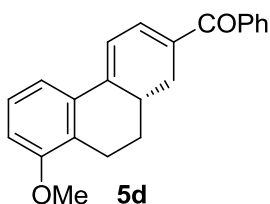

Isolated as a yellow solid by FC on silica gel using Et<sub>2</sub>O/pentane 1:20 as eluent.  $[\alpha]_D^{22} = -280.0$  (c 1.2 in CH<sub>2</sub>Cl<sub>2</sub>). <sup>1</sup>H NMR (400 MHz, CDCl<sub>3</sub>) δ 7.68 (d, *J* = 8.3 Hz, 1H), 7.67 (s, 1H), 7.55–7.49 (m, 1H), 7.47–7.37 (m, 3H), 7.18 (t, *J* = 7.9 Hz, 1H), 6.84 (dd, *J* = 6.2, 2.8 Hz, 1H), 6.79 (d, *J* = 8.1 Hz, 1H), 6.75 (dd, *J* = 6.2 Hz, 2.3 Hz, 1H), 3.85 (s, 3H), 3.17 (ddd, *J* = 17.0, 4.1, 2.6 Hz, 1H), 3.04 (dd, *J* = 16.6, 7.3 Hz, 1H), 2.80–2.63 (m, 1H), 2.45 (ddd, *J* = 17.0, 12.9, 4.2 Hz, 1H) 2.32 (m, 2H), 1.64–1.50 (m, 1H). <sup>13</sup>C

NMR (100 MHz, CDCl<sub>3</sub>) δ 190.6, 157.2, 144.4, 139.0, 138.8, 135.3, 133.2, 131.2, 129.0 (2C), 128.5, 128.1 (2C), 126.5, 116.8, 116.3, 109.7, 55.5, 36.0, 29.9, 29.3, 22.8. HRMS (ESI+) *m/z* calcd. for C<sub>22</sub>H<sub>20</sub>O<sub>2</sub> [M+H]<sup>+</sup>: 317.1536; found: 317.1537. UPC<sup>2</sup>: ID, CO<sub>2</sub>/*i*-PrOH gradient, 3.0 mL·min<sup>-1</sup>; *t*<sub>major</sub> = 5.07 min; *t*<sub>minor</sub> = 5.21 min

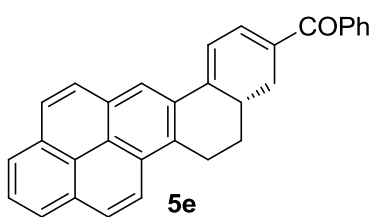

Isolated as a yellow solid by FC on silica gel using Et<sub>2</sub>O/pentane 1:10 as eluent.  $[\alpha]_D^{22} = -120.2$  (c 2.0 in CH<sub>2</sub>Cl<sub>2</sub>). <sup>1</sup>H NMR (400 MHz, CDCl<sub>3</sub>) δ 8.58 (s, 1H), 8.32 (d, *J* = 9.2 Hz, 1H), 8.19–8.10 (m, 3H), 8.01–7.96 (m, 3H), 7.76–7.71 (m, 2H), 7.59–7.45 (m, 3H), 7.14 (dd, *J* = 6.1, 2.6 Hz, 1H), 6.98 (dd, *J* = 6.1, 2.6 Hz, 1H), 3.90 (dt, *J* = 16.6, 3.4 Hz, 1H), 3.77 (ddd, *J* = 17.0, 13.0, 4.7 Hz, 1H), 3.18 (dd, *J* = 17.0, 7.3 Hz, 1H), 3.04–2.89 (m, 1H), 2.54–

2.33 (m, 2H), 1.84 (dq, *J* = 13.0, 4.1 Hz, 1H). <sup>13</sup>C NMR (100 MHz, CDCl<sub>3</sub>) δ 196.6, 145.0, 139.0, 138.8, 135.4, 133.9, 133.3, 131.6, 131.3, 131.1, 129.9, 129.7, 129.1 (2C), 128.2 (2C), 128.0, 127.8, 127.2, 126.3, 125.2, 125.1, 124.9, 124.7, 123.2, 120.7, 117.6, 36.1, 30.0, 29.8, 26.4. HRMS (ESI+) *m/z* calcd. for C<sub>31</sub>H<sub>22</sub>O [M+H]<sup>+</sup>: 411.1743; found: 411.1743. HPLC: IA, 95:5 hexane/*i*-PrOH, 1.0 mL·min<sup>-1</sup>; *t*<sub>major</sub> = 23.68 min; *t*<sub>minor</sub> = 22.45 min.

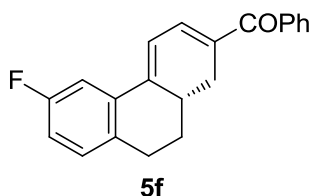

Isolated as a yellow solid by FC on silica gel using Et<sub>2</sub>O/pentane 1:10 as eluent.  $[\alpha]_D^{22} = -260.6$  (c 1.3 in CH<sub>2</sub>Cl<sub>2</sub>). <sup>1</sup>H NMR (400 MHz, CDCl<sub>3</sub>) δ 7.68 (d, *J* = 8.4 Hz, 1H), 7.67 (s, 1H), 7.56–7.50 (m, 1H), 7.48–7.37 (m, 3H), 7.11 (dd, *J* = 8.4, 7.0 Hz, 1H), 6.93 (dt, *J* = 8.4, 2.7 Hz, 1H), 6.84 (dd, *J* = 6.1, 2.7 Hz, 1H), 6.69 (dd, *J* = 6.1, 2.7 Hz, 1H), 3.04 (dd, *J* = 16.6, 7.0 Hz, 1H), 2.92–2.64 (m, 3H), 2.31–2.13 (m,

2H), 1.61 (dq, *J* = 12.8, 4.4 Hz, 1H). <sup>13</sup>C NMR (100 MHz, CDCl<sub>3</sub>) δ 196.5, 161.6 (d, *J* = 244.4 Hz), 143.1 (d, *J* = 3.0 Hz), 138.5, 138.3, 136.0, 134.9 (d, *J* = 2.8 Hz), 133.9 (d, *J* = 7.1 Hz), 131.4, 130.8 (d, *J* = 7.8 Hz), 129.0 (2C), 128.2 (2C), 117.3, 115.8 (d, *J* = 22.1 Hz), 110.1 (d, *J* = 21.9 Hz), 36.2, 29.84, 29.79, 29.77. <sup>19</sup>F NMR (376 MHz, CDCl<sub>3</sub>) δ -116.35–(-116.46) (m). HRMS (ESI+) *m/z* calcd. for C<sub>21</sub>H<sub>17</sub>FO [M+H]<sup>+</sup>: 305.1336; found: 305.1340. UPC<sup>2</sup>: IB, CO<sub>2</sub>/*i*-PrOH gradient, 3.0 mL·min<sup>-1</sup>; *t*<sub>major</sub> = 3.79 min; *t*<sub>minor</sub> = 3.68 min.

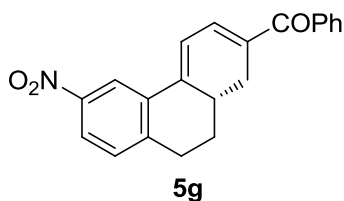

Isolated as a yellow solid by FC on silica gel using Et<sub>2</sub>O/pentane 1:9 to 3:17 as eluent.  $[\alpha]_D^{22} = -369.8$  (c 0.53 in CH<sub>2</sub>Cl<sub>2</sub>). <sup>1</sup>H NMR (400 MHz, CDCl<sub>3</sub>) δ 8.60 (d, *J* = 2.3 Hz, 1H), 8.03 (dd, *J* = 8.4, 2.3 Hz, 1H), 7.72–7.66 (m, 2H), 7.58–7.52 (m, 1H), 7.49–7.43 (m, 2H), 7.31 (d, *J* = 8.2 Hz, 1H), 6.90 (dd, *J* = 6.1, 2.7 Hz, 1H), 6.86 (dd, *J* = 6.1, 2.7 Hz, 1H), 3.11–2.71 (m, 4H), 2.33–2.18 (m, 2H), 1.65 (qd, *J* = 12.8, 4.2 Hz, 1H). <sup>13</sup>C NMR (100 MHz, CDCl<sub>3</sub>) δ 196.4, 146.9, 145.8, 141.3, 138.2, 137.6, 136.8, 133.6, 131.6, 130.4, 129.0 (2C), 128.2 (2C), 122.4, 119.2, 118.7, 35.9, 30.6, 29.6, 28.9. HRMS (ESI+) *m/z* calcd. for C<sub>21</sub>H<sub>17</sub>NO<sub>3</sub> [M+H]<sup>+</sup>: 332.1281, found: 332.1284. UPC<sup>2</sup>: IB, CO<sub>2</sub>/MeOH gradient, 3.0 mL·min<sup>-1</sup>, *t*<sub>major</sub> = 4.94 min, *t*<sub>minor</sub> = 4.78 min.

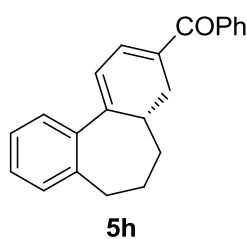

Isolated as a pale yellow oil by FC on silica gel using Et<sub>2</sub>O/pentane 3:97 to 1:19 as eluent.  $[\alpha]_D^{22} = -181.0$  (c 0.4 in CH<sub>2</sub>Cl<sub>2</sub>). <sup>1</sup>H NMR (400 MHz, CDCl<sub>3</sub>) δ 7.73–7.66 (m, 2H), 7.56–7.49 (m, 1H), 7.48–7.41 (m, 2H), 7.33–7.28 (m, 1H), 7.25–7.19 (m, 2H), 7.17–7.11 (m, 1H), 6.79 (d, *J* = 5.8 Hz, 1H), 6.18 (d, *J* = 5.7 Hz, 1H), 2.91–2.71 (m, 4H), 2.69–2.56 (m, 1H), 1.90–1.75 (m, 3H), 1.71–1.60 (m, 1H). <sup>13</sup>C NMR (100 MHz, CDCl<sub>3</sub>) δ 197.3, 153.1, 140.9, 139.7, 138.7, 137.8, 134.3, 131.3, 129.4, 129.0 (2C), 128.1, 128.1 (2C), 127.4, 126.3, 120.9, 36.1, 33.6, 30.2, 29.0, 25.3. HRMS (ESI+) *m/z* calcd. for C<sub>22</sub>H<sub>20</sub>O [M+H]<sup>+</sup>: 301.1587; found: 301.1591. UPC<sup>2</sup>: IA, CO<sub>2</sub>/*i*-PrOH gradient, 3.0 mL·min<sup>-1</sup>; *t*<sub>minor</sub> = 3.60 min; *t*<sub>major</sub> = 3.67 min.

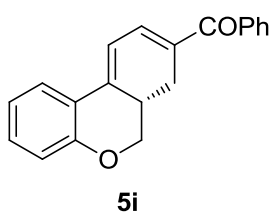

Isolated as a yellow solid by FC on silica gel using Et<sub>2</sub>O/pentane 3:22 to 1:9 as eluent.  $[\alpha]_D^{22} = -476.5$  (c 0.5 in CH<sub>2</sub>Cl<sub>2</sub>). <sup>1</sup>H NMR (400 MHz, CDCl<sub>3</sub>) δ 7.69–7.64 (m, 2H), 7.61 (dd, *J* = 8.1, 1.6 Hz, 1H), 7.55–7.50 (m, 1H), 7.45 (t, *J* = 7.4 Hz, 2H), 7.21 (ddd, *J* = 8.5, 7.2, 1.5 Hz, 1H), 6.94 (ddd, *J* = 8.2, 7.2, 1.2 Hz, 1H), 6.87 (dd, *J* = 8.3, 1.2 Hz, 1H), 6.81 (dd, *J* = 6.1, 2.8 Hz, 1H), 6.57 (dd, *J* = 6.2, 2.6 Hz, 1H), 4.43 (dd, *J* = 10.6, 5.3 Hz, 1H), 4.00 (dd, *J* = 12.2, 10.6 Hz, 1H), 3.49–3.35 (m, 1H), 2.92 (dd, *J* = 16.7, 7.8 Hz, 1H), 2.23 (ddd, *J* = 19.2, 16.7, 2.8 Hz, 1H). <sup>13</sup>C NMR (100 MHz, CDCl<sub>3</sub>) δ 196.3, 156.5, 139.0, 138.4, 138.2, 133.4, 131.4, 130.8, 128.9 (2C), 128.1 (2C), 124.2, 121.6, 120.0, 118.2, 113.7, 70.5, 35.7, 23.9. HRMS (ESI+) *m/z* calcd. for C<sub>20</sub>H<sub>16</sub>O<sub>2</sub> [M+H]<sup>+</sup>: 289.1223; found: 289.1224. UPC<sup>2</sup>: IA, CO<sub>2</sub>/MeOH gradient, 3.0 mL·min<sup>-1</sup>; *t*<sub>minor</sub> = 5.26 min; *t*<sub>major</sub> = 5.48 min.

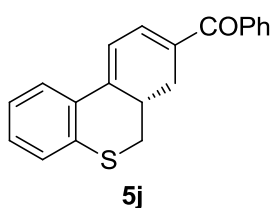

Isolated as a yellow oil by FC on silica gel using CH<sub>2</sub>Cl<sub>2</sub>/pentane 1:1 to 3:1 as eluent.  $[\alpha]_D^{22} = -365.0$  (c 0.5 in CH<sub>2</sub>Cl<sub>2</sub>). <sup>1</sup>H NMR (400 MHz, CDCl<sub>3</sub>) δ 7.71–7.64 (m, 3H), 7.56–7.50 (m, 1H), 7.48–7.42 (m, 2H), 7.24 (dd, *J* = 7.7, 1.6 Hz, 1H), 7.16 (td, *J* = 7.5, 1.7 Hz, 1H), 7.11 (td, *J* = 7.5, 1.7 Hz, 1H), 6.81 (dd, *J* = 6.0, 2.6 Hz, 1H), 6.63 (dd, *J* = 6.1, 2.7 Hz, 1H), 3.38–3.23 (m, 1H), 3.05–2.84 (m, 3H), 2.56–2.43 (m, 1H). <sup>13</sup>C NMR (100 MHz, CDCl<sub>3</sub>) δ 196.4, 142.0, 138.3, 138.3, 135.8, 135.5, 132.4, 131.5, 129.0, 128.9 (2C), 128.5, 128.2 (2C), 125.9, 125.6, 119.0, 40.6, 32.2, 29.2. HRMS (ESI+) *m/z* calcd. for C<sub>20</sub>H<sub>16</sub>OS [M+H]<sup>+</sup>: 305.0995; found: 305.0997. UPC<sup>2</sup>: ID, CO<sub>2</sub>/MeOH gradient, 3.0 mL·min<sup>-1</sup>; *t*<sub>major</sub> = 5.73 min; *t*<sub>minor</sub> = 6.19 min.



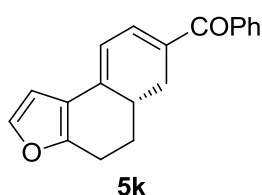

Isolated as a yellow oil by FC on silica gel using Et<sub>2</sub>O/ pentane 1:9 as eluent.  $[\alpha]_D^{22} = -108.0$  (c 0.2 in CH<sub>2</sub>Cl<sub>2</sub>). <sup>1</sup>H NMR (400 MHz, CDCl<sub>3</sub>) δ 7.68–7.61 (m, 2H), 7.52–7.47 (m, 1H), 7.46–7.39 (m, 2H), 7.31 (d, *J* = 2.0 Hz, 1H), 6.81 (dd, *J* = 5.9, 2.8 Hz, 1H), 6.51 (d, *J* = 2.0 Hz, 1H), 6.11 (dd, *J* = 6.1, 2.3 Hz, 1H), 3.11 (dd, *J* = 16.6, 7.5 Hz, 1H), 2.93–2.87 (m, 1H), 2.84–2.75 (m, 1H), 2.73–2.62 (m, 1H), 2.33–2.25 (m, 1H), 2.22–2.13 (m, 1H), 1.75 (qd, *J* = 12.6, 5.8 Hz, 1H). <sup>13</sup>C NMR (100 MHz, CDCl<sub>3</sub>) δ 196.5, 156.6, 142.6, 140.8, 139.7, 139.1, 133.1, 131.2, 129.1 (2C), 128.2 (2C), 118.3, 114.0, 106.2, 35.0, 30.9, 29.3, 23.6. HRMS (ESI+) *m/z* calcd. for C<sub>19</sub>H<sub>16</sub>O<sub>2</sub> [M+H]<sup>+</sup>: 277.1223; found: 277.1221. UPC<sup>2</sup>: IA, CO<sub>2</sub>/*i*-PrOH gradient, 3.0 mL·min<sup>-1</sup>; *t*<sub>major</sub> = 4.25 min; *t*<sub>minor</sub> = 4.06 min.

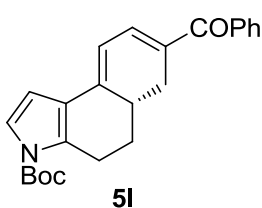

Isolated as a yellow solid by FC on silica gel using Et<sub>2</sub>O/pentane 1:1 as eluent.  $[\alpha]_D^{22} = -196.9$  (c 0.6 in CH<sub>2</sub>Cl<sub>2</sub>). <sup>1</sup>H NMR (400 MHz, CDCl<sub>3</sub>) δ 7.68–7.59 (m, 2H), 7.52–7.45 (m, 1H), 7.45–7.39 (m, 2H), 7.20 (d, *J* = 3.5 Hz, 1H), 6.81 (dd, *J* = 6.1, 2.7 Hz, 1H), 6.36 (d, *J* = 3.6 Hz, 1H), 6.16 (dd, *J* = 6.2, 2.4 Hz, 1H), 3.35 (dd, *J* = 18.0, 3.8 Hz, 1H), 3.09 (dd, *J* = 16.6, 7.5 Hz, 1H), 2.86 (ddd, *J* = 18.0, 12.7, 5.3 Hz, 1H), 2.75–2.61 (m, 1H), 2.29–2.10 (m, 2H), 1.77–1.62 (m, 1H), 1.60 (s, 9H). <sup>13</sup>C NMR (100 MHz, CDCl<sub>3</sub>) δ 196.3, 149.1, 142.0, 140.1, 139.1, 135.1, 132.7, 130.9, 128.9 (2C), 128.0 (2C), 122.0, 121.9, 113.4, 106.4, 84.1, 34.7, 30.9, 29.2, 28.0 (3C), 24.6. HRMS (ESI+) *m/z* calcd. for C<sub>24</sub>H<sub>25</sub>NO<sub>3</sub> [M+H]<sup>+</sup>: 376.1907; found: 376.1914. UPC<sup>2</sup>: ID, CO<sub>2</sub>/MeOH gradient, 3.0 mL·min<sup>-1</sup>; *t*<sub>minor</sub> = 4.90 min; *t*<sub>major</sub> = 5.67 min.

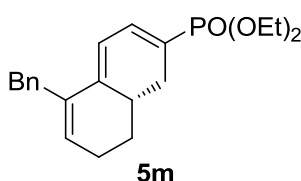

Isolated as a yellow oil by FC on silica gel using EtOAc/pentane 1:1 as eluent.  $[\alpha]_D^{22} = -8.4$  (c 1.3 in CH<sub>2</sub>Cl<sub>2</sub>). <sup>1</sup>H NMR (400 MHz, CDCl<sub>3</sub>) δ 7.32–7.13 (m, 5H), 6.78 (dd, *J* = 5.6, 3.1 Hz, 1H), 5.96 (d, *J* = 4.5 Hz, 1H), 5.82 (t, *J* = 4.2 Hz, 1H), 4.13–3.97 (m, 4H), 3.54 (s, 2H), 2.65–2.49 (m, 1H), 2.48 (dd, *J* = 16.2, 7.1 Hz, 1H), 2.33–2.23 (m, 2H), 2.17–1.89 (m, 2H), 1.48 (dq, *J* = 11.9, 6.2 Hz, 1H), 1.32 (q, *J* = 7.3 Hz, 6H). <sup>13</sup>C NMR (100 MHz, CDCl<sub>3</sub>) δ 142.4 (d, *J* = 4.4 Hz), 140.0, 138.1 (d, *J* = 9.9 Hz), 134.8 (d, *J* = 1.7 Hz), 134.1, 128.6 (2C), 128.0 (2C), 126.0, 123.2 (d, *J* = 188.7 Hz), 116.3, (d, *J* = 18.8 Hz), 61.6 (d, 4.7 Hz), 61.5 (d, 4.9 Hz), 38.6, 35.2 (d, *J* = 8.2 Hz), 30.2 (d, *J* = 8.9 Hz), 29.8, 25.9, 16.5 (d, *J* = 6.4 Hz), 16.4 (d, *J* = 6.8 Hz). <sup>31</sup>P NMR (162 MHz, CDCl<sub>3</sub>): δ 19.9. HRMS (ESI+) *m/z* calcd. for C<sub>21</sub>H<sub>27</sub>O<sub>3</sub>P [M+H]<sup>+</sup>: 359.1771; found: 359.1774. UPC<sup>2</sup>: IA, CO<sub>2</sub>/MeOH gradient, 3.0 mL·min<sup>-1</sup>; *t*<sub>major</sub> = 3.24 min; *t*<sub>minor</sub> = 3.07 min.

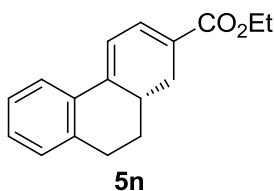

Isolated as a pale yellow oil by FC on silica gel using Et<sub>2</sub>O/pentane 1:30 as eluent.  $[\alpha]_D^{22} = -329.8$  (c 0.6 in CH<sub>2</sub>Cl<sub>2</sub>). <sup>1</sup>H NMR (400 MHz, CDCl<sub>3</sub>) δ 7.79–7.73 (m, 1H), 7.23–7.17 (m, 3H), 7.16–7.11 (m, 1H), 6.74 (dd, *J* = 5.9, 2.7 Hz, 1H), 4.25 (q, *J* = 7.3 Hz, 2H), 2.91–2.76 (m, 3H), 2.73–2.59 (m, 1H), 2.18–2.05 (m, 2H), 1.58 (dq, *J* = 12.5, 5.5 Hz, 1H), 1.33 (t, *J* = 7.3 Hz, 3H). <sup>13</sup>C NMR (100 MHz, CDCl<sub>3</sub>) δ 167.2, 142.6, 139.0, 134.3, 132.4, 129.4, 128.3, 127.5, 126.4, 123.9, 116.1, 60.4, 36.5, 30.5, 29.8, 29.6, 14.4. HRMS (ESI+) *m/z* calcd. for C<sub>17</sub>H<sub>18</sub>O<sub>2</sub> [M+H]<sup>+</sup>: 255.1380; found: 255.1380. UPC<sup>2</sup>: IC, CO<sub>2</sub>/*i*-PrOH gradient, 3.0 mL·min<sup>-1</sup>; *t*<sub>major</sub> = 3.78 min; *t*<sub>minor</sub> = 3.86 min.

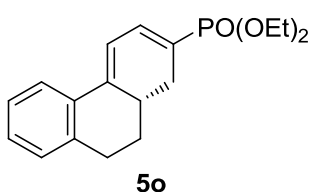

Isolated as a yellow oil by FC on silica gel using EtOAc/pentane 1:1 as eluent.  $[\alpha]_D^{22} = -228.6$  (c 0.7 in CH<sub>2</sub>Cl<sub>2</sub>). <sup>1</sup>H NMR (400 MHz, CDCl<sub>3</sub>) δ 7.74 (dd, *J* = 5.7, 4.2 Hz, 1H), 7.22–7.16 (m, 2H), 7.15–7.10 (m, 1H), 6.97 (dd, *J* = 5.7, 2.9 Hz, 1H), 6.71 (dd, *J* = 5.7, 2.9 Hz, 1H), 4.18–4.01 (m, 4H), 2.93–2.72 (m, 2H), 2.71–2.58

(m, 1H), 2.54 (dd,  $J = 16.4, 7.0$  Hz, 1H), 2.15–2.01 (m, 2H), 1.55 (dq,  $J = 12.3, 5.2$  Hz, 1H), 1.36 (t,  $J = 7.1$  Hz, 3H), 1.33 (t,  $J = 7.1$  Hz, 3H).  $^{13}\text{C}$  NMR (100 MHz,  $\text{CDCl}_3$ )  $\delta$  141.5 (d,  $J = 4.5$  Hz), 138.8, 138.0 (d,  $J = 10.0$  Hz), 132.2 (d,  $J = 1.7$  Hz), 129.3, 128.3, 126.4, 124.1 (d,  $J = 189.0$  Hz), 123.8, 115.5 (d,  $J = 20.0$  Hz), 61.7 (d,  $J = 5.1$  Hz), 61.6 (d,  $J = 5.1$  Hz), 35.9 (d,  $J = 8.2$  Hz), 30.4, 30.0 (d,  $J = 8.0$  Hz), 29.7, 16.5 (d,  $J = 6.7$  Hz), 16.4 (d,  $J = 6.7$  Hz).  $^{31}\text{P}$  NMR (162 MHz,  $\text{CDCl}_3$ ):  $\delta$  20.0 HRMS (ESI+)  $m/z$  calcd. for  $\text{C}_{18}\text{H}_{23}\text{O}_3\text{P}$   $[\text{M}+\text{H}]^+$ : 319.1458; found: 319.1460. UPC<sup>2</sup>: IC,  $\text{CO}_2/i\text{-PrOH}$  gradient,  $3.0\text{ mL}\cdot\text{min}^{-1}$ ;  $t_{\text{major}} = 5.49$  min;  $t_{\text{minor}} = 5.23$  min.

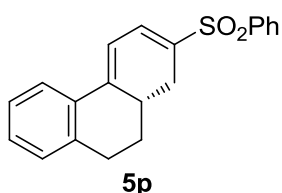

Isolated as a pale yellow solid by FC on silica gel using  $\text{CH}_2\text{Cl}_2/\text{pentane}$  3:2 to 4:1 as eluent.  $[\alpha]_D^{22} = -142.2$  ( $c$  0.5 in  $\text{CH}_2\text{Cl}_2$ ).  $^1\text{H}$  NMR (400 MHz,  $\text{CDCl}_3$ )  $\delta$  7.95–7.89 (m, 2H), 7.76–7.70 (m, 1H), 7.64–7.58 (m, 1H), 7.57–7.50 (m, 2H), 7.24–7.16 (m, 3H), 7.14–7.09 (m, 1H), 6.74 (dd,  $J = 6.3, 2.6$  Hz, 1H), 2.87–2.57 (m, 4H), 2.13–1.98 (m, 2H), 1.50 (qd,  $J = 12.3, 5.0$  Hz, 1H).  $^{13}\text{C}$  NMR (100 MHz,  $\text{CDCl}_3$ )  $\delta$  142.7, 140.1, 139.0, 135.3, 133.3, 133.1, 131.5, 129.4, 129.2 (2C), 128.9, 127.8 (2C), 126.5, 124.1, 114.5, 36.7, 30.2, 29.6, 28.6. HRMS (ESI+)  $m/z$  calcd. for  $\text{C}_{20}\text{H}_{18}\text{O}_2\text{S}$   $[\text{M}+\text{H}]^+$ : 323.1100; found: 323.1102. UPC<sup>2</sup>: IA,  $\text{CO}_2/\text{MeOH}$  gradient,  $3.0\text{ mL}\cdot\text{min}^{-1}$ ;  $t_{\text{major}} = 5.02$  min;  $t_{\text{minor}} = 5.23$  min.

### 3.2. Asymmetric formation of chiral carbocycles **7**

A glass vial equipped with a magnetic stirring bar was charged with enal **1** (0.20 mmol, 2.0 eq), catalyst **3b** (0.02 mmol, 0.2 eq), nitro olefin **6** (0.10 mmol, 1.0 eq), *i*-PrNEt<sub>2</sub> (0.50 mmol, 0.5 eq) and MeCN (0.3 mL). The mixture was stirred for 22-65 h at 40 °C (individual reaction times specified below). The solvent was evaporated *in vacuo* and the mixture was then subjected to FC (loaded with CH<sub>2</sub>Cl<sub>2</sub>) on silica gel to yield product **7**. For compound **7b** DABCO (0.50 mmol, 0.5 eq) was employed instead of *i*-PrNEt<sub>2</sub>. Compound **7i** was synthesized using 0.10 mmol (1.0 eq) of enal **1** and 0.20 mmol of nitro olefin **6** (2.0 eq).

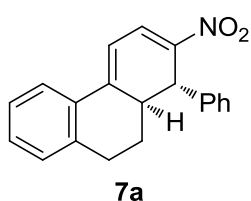

Isolated after 22 h of reaction time as a yellow solid by FC on silica gel using CH<sub>2</sub>Cl<sub>2</sub>/pentane 1:2 as eluent.  $[\alpha]_D^{22} = -45.6$ . (c 0.2 in CH<sub>2</sub>Cl<sub>2</sub>). <sup>1</sup>H NMR (400 MHz, CDCl<sub>3</sub>) δ 7.71 (dd, *J* = 7.3, 1.9 Hz, 1H), 7.48 (dd, *J* = 6.8, 1.9 Hz, 1H), 7.35–7.21 (m, 7H), 7.11 (dd, *J* = 7.3, 1.9 Hz, 1H), 6.64 (dd, *J* = 6.8, 2.5 Hz, 1H), 4.08 (dd, *J* = 13.4, 1.9 Hz, 1H), 3.08–2.98 (m, 1H), 2.87–2.72 (m, 2H), 1.98–1.91 (m, 1H), 1.80 (qd, *J* = 12.6, 6.0 Hz, 1H). <sup>13</sup>C NMR (100 MHz, CDCl<sub>3</sub>) δ 148.5, 145.2, 142.8, 138.6, 132.5, 129.5, 129.4, 129.2, 128.8 (2C), 127.6 (2C), 127.2, 126.6, 124.7, 113.1, 47.9, 46.5, 30.1,

29.8. HRMS (ESI+) *m/z* calcd. for C<sub>20</sub>H<sub>17</sub>NO<sub>2</sub> [M+H]<sup>+</sup>: 304.1338; found: 304.1336. UPC<sup>2</sup>: IC, CO<sub>2</sub>/*i*-PrOH gradient, 3.0 mL·min<sup>-1</sup>; t<sub>major</sub> = 6.61 min; t<sub>minor</sub> = 6.10 min.

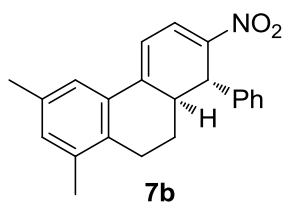

Isolated after 48 h of reaction time as a yellow solid by FC on silica gel using CH<sub>2</sub>Cl<sub>2</sub>/pentane 1:2 as eluent.  $[\alpha]_D^{22} = -27.0$  (c 0.7 in CH<sub>2</sub>Cl<sub>2</sub>). <sup>1</sup>H NMR (400 MHz, CDCl<sub>3</sub>) δ 7.55 (d, *J* = 6.7 Hz, 1H), 7.34 (s, 1H), 7.32–7.20 (m, 5H), 6.99 (s, 1H), 6.54 (dd, *J* = 6.8, 1.4 Hz, 1H), 4.10 (d, *J* = 10.0 Hz, 1H), 3.00–2.90 (m, 1H), 2.81 (dd, *J* = 17.2, 4.9 Hz, 1H), 2.58 (ddd, *J* = 17.2, 11.8, 5.2 Hz, 1H), 2.32 (s, 3H), 2.17 (s, 3H), 2.11–2.03 (m, 1H), 1.88 (dq, *J* = 12.6, 5.2 Hz, 1H). <sup>13</sup>C NMR (100 MHz, CDCl<sub>3</sub>) δ

147.5, 147.4, 143.5, 136.8, 135.6, 133.8, 133.3, 132.2, 129.2, 128.8 (2C), 127.4 (2C), 127.1, 123.0, 112.8, 46.9, 46.4, 31.2, 27.1, 21.0, 19.4. HRMS (ESI+) *m/z* calcd. for C<sub>22</sub>H<sub>21</sub>NO<sub>2</sub> [M+H]<sup>+</sup>: 332.1645; found: 332.1645. UPC<sup>2</sup>: IC, CO<sub>2</sub>/*i*-PrOH gradient, 3.0 mL·min<sup>-1</sup>; t<sub>major</sub> = 6.91 min; t<sub>minor</sub> = 6.20 min.

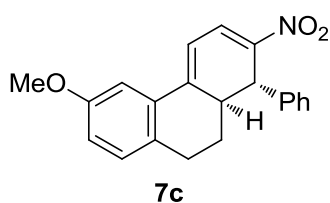

Isolated after 24 h of reaction time as a yellow solid by FC on silica gel using CH<sub>2</sub>Cl<sub>2</sub>/pentane 4:6 to 6:4 as eluent.  $[\alpha]_D^{22} = -66.0$  (c 0.1 in CH<sub>2</sub>Cl<sub>2</sub>). <sup>1</sup>H NMR (400 MHz, CDCl<sub>3</sub>) δ 7.42 (dd, *J* = 6.9, 1.9 Hz, 1H), 7.30–7.17 (m, 5H), 7.13 (d, *J* = 2.6 Hz, 1H), 6.98 (d, *J* = 8.4 Hz, 1H), 6.80 (dd, *J* = 8.4, 2.6 Hz, 1H), 6.55 (dd, *J* = 6.9, 2.5 Hz, 1H), 4.02 (dd, *J* = 13.3, 1.9 Hz, 1H), 3.78 (s, 3H), 2.95 (tdd, *J* = 13.3, 4.0, 2.5 Hz, 1H), 2.75–2.59 (m, 2H), 1.91–1.83 (m, 1H), 1.71 (qd, *J* = 12.6, 5.3

Hz, 1H). <sup>13</sup>C NMR (100 MHz, CDCl<sub>3</sub>) δ 158.2, 148.7, 145.2, 142.8, 133.4, 131.1, 130.3, 129.0, 128.8 (2C), 127.6 (2C), 127.2, 116.4, 113.3, 108.8, 55.4, 47.9, 46.5, 30.19, 29.33. HRMS (ESI+) *m/z* calcd. for C<sub>21</sub>H<sub>19</sub>NO<sub>3</sub> [M+H]<sup>+</sup>: 334.1443; found: 334.1438. UPC<sup>2</sup>: IC, CO<sub>2</sub>/*i*-PrOH gradient, 3.0 mL·min<sup>-1</sup>; t<sub>major</sub> = 6.69 min; t<sub>minor</sub> = 7.17 min.

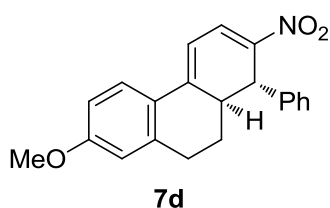

Isolated after 65 h of reaction time as an orange solid by FC on silica gel using CH<sub>2</sub>Cl<sub>2</sub>/pentane 4:6 to 6:4 as eluent.  $[\alpha]_D^{22} = -25.5$  (c 0.1 in CH<sub>2</sub>Cl<sub>2</sub>). <sup>1</sup>H NMR (400 MHz, CDCl<sub>3</sub>) δ 7.62 (d, *J* = 8.9 Hz, 1H), 7.42 (dd, *J* = 6.9, 2.1 Hz, 1H), 7.30–7.18 (m, 5H), 6.74 (dd, *J* = 8.9, 2.8 Hz, 1H), 6.55 (d, *J* = 2.8 Hz, 1H), 6.47 (dd, *J* = 6.9, 2.6 Hz, 1H), 3.98 (dd, *J* = 14.3, 2.1 Hz, 1H), 3.75 (s, 3H), 2.99–2.89 (m, 1H),

2.76–2.61 (m, 2H), 1.89–1.80 (m, 1H), 1.75–1.60 (m, 1H).  $^{13}\text{C}$  NMR (100 MHz,  $\text{CDCl}_3$ )  $\delta$  160.8, 147.6, 145.0, 143.0, 140.7, 130.1, 128.7 (2C), 127.8 (2C), 127.1, 126.5, 125.1, 113.6, 113.2, 111.0, 55.3, 48.2, 46.5, 30.5, 29.4. HRMS (ESI+)  $m/z$  calcd. for  $\text{C}_{21}\text{H}_{19}\text{NO}_3$   $[\text{M}+\text{H}]^+$ : 334.1443; found: 334.1439. UPC<sup>2</sup>: IC,  $\text{CO}_2/i\text{-PrOH}$  gradient,  $3.0\text{ mL}\cdot\text{min}^{-1}$ ;  $t_{\text{major}} = 7.47\text{ min}$ ;  $t_{\text{minor}} = 8.29\text{ min}$ .

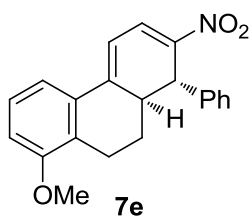

Isolated after 65 h of reaction time as a yellow solid by FC on silica gel using  $\text{CH}_2\text{Cl}_2/\text{pentane}$  4:6 to 1:1 as eluent.  $[\alpha]_D^{22} = -4.4$  (c 1.0 in  $\text{CH}_2\text{Cl}_2$ ).  $^1\text{H}$  NMR (400 MHz,  $\text{CDCl}_3$ )  $\delta$  7.46 (dd,  $J = 6.9, 1.6\text{ Hz}$ , 1H), 7.28–7.24 (m, 6H), 7.15 (t,  $J = 8.1\text{ Hz}$ , 1H), 6.76 (dd,  $J = 8.1, 1.1\text{ Hz}$ , 1H), 6.53 (dd,  $J = 6.9, 2.3\text{ Hz}$ , 1H), 4.04 (dd,  $J = 11.0, 1.6\text{ Hz}$ , 1H), 3.76 (s, 3H), 3.01–2.88 (m, 2H), 2.42 (ddd,  $J = 18.0, 12.6, 5.6\text{ Hz}$ , 1H), 2.02–1.95 (m, 1H), 1.76 (qd,  $J = 12.9, 5.2\text{ Hz}$ , 1H).  $^{13}\text{C}$  NMR (100 MHz,  $\text{CDCl}_3$ )  $\delta$  157.2, 148.1, 146.2, 143.3, 134.2, 128.9, 128.8 (2C), 127.5 (2C), 127.4, 127.2, 126.8, 116.7, 113.4, 110.4, 55.5, 47.2, 46.2, 30.4, 23.6. HRMS (ESI+)  $m/z$  calcd. for  $\text{C}_{21}\text{H}_{19}\text{NO}_3$   $[\text{M}+\text{H}]^+$ : 334.1443; found: 334.1437. UPC<sup>2</sup>: IB,  $\text{CO}_2/i\text{-PrOH}$  gradient,  $3.0\text{ mL}\cdot\text{min}^{-1}$ ;  $t_{\text{major}} = 4.95\text{ min}$ ;  $t_{\text{minor}} = 4.65\text{ min}$ .

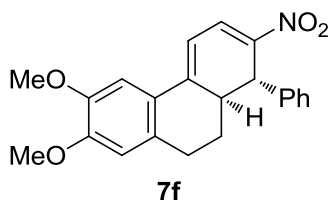

Isolated after 52 h of reaction time as an orange solid by FC on silica gel using  $\text{Et}_2\text{O}/\text{CH}_2\text{Cl}_2/\text{pentane}$  1:1:4 as eluent.  $[\alpha]_D^{22} = -96.6$  (c 0.3 in  $\text{CH}_2\text{Cl}_2$ ).  $^1\text{H}$  NMR (400 MHz,  $\text{CDCl}_3$ )  $\delta$  7.42 (dd,  $J = 6.9, 2.1\text{ Hz}$ , 1H), 7.30–7.24 (m, 2H), 7.23–7.17 (m, 3H), 7.10 (s, 1H), 6.50 (s, 1H), 6.44 (dd,  $J = 6.9, 2.5\text{ Hz}$ , 1H), 3.98 (dd,  $J = 14.3, 2.1\text{ Hz}$ , 1H), 3.86 (s, 3H), 3.82 (s, 3H), 2.99–2.88 (m, 1H), 2.68–2.61 (m, 2H), 1.90–1.83 (m, 1H), 1.74–1.63 (m, 1H).  $^{13}\text{C}$  NMR (100 MHz,  $\text{CDCl}_3$ )  $\delta$  150.9, 148.0, 147.7, 145.0, 143.0, 132.8, 129.9, 128.8 (2C), 127.8 (2C), 127.1, 124.6, 111.3, 111.1, 106.9, 56.0, 55.9, 48.2, 46.4, 29.9, 29.7. HRMS (ESI+)  $m/z$  calcd. for  $\text{C}_{22}\text{H}_{21}\text{NO}_4$   $[\text{M}+\text{H}]^+$ : 364.1549; found: 364.1548. UPC<sup>2</sup>: IB,  $\text{CO}_2/i\text{-PrOH}$  gradient,  $3.0\text{ mL}\cdot\text{min}^{-1}$ ;  $t_{\text{major}} = 5.25\text{ min}$ ;  $t_{\text{minor}} = 5.00\text{ min}$ .

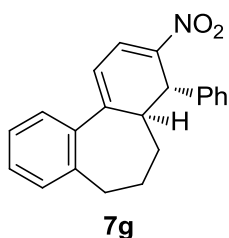

Isolated after 24 h of reaction time as a yellow oil by FC on silica gel using  $\text{CH}_2\text{Cl}_2/\text{pentane}$  1:2 as eluent.  $[\alpha]_D^{22} = +116.6$  (c 0.5 in  $\text{CH}_2\text{Cl}_2$ ).  $^1\text{H}$  NMR (400 MHz,  $\text{CDCl}_3$ )  $\delta$  7.76 (d,  $J = 6.6\text{ Hz}$ , 1H), 7.29–7.09 (m, 9H), 6.25 (d,  $J = 6.6\text{ Hz}$ , 1H), 4.10 (bs, 1H), 2.95 (dd,  $J = 11.9, 4.6\text{ Hz}$ , 1H), 2.89–2.83 (m, 2H), 2.11–2.00 (m, 1H), 1.93–1.75 (m, 3H).  $^{13}\text{C}$  NMR (100 MHz,  $\text{CDCl}_3$ )  $\delta$  153.4, 146.9, 140.4 (2C), 140.1, 130.1, 128.8 (3C), 128.3, 127.5, 127.4, 126.7 (2C), 126.4, 117.4, 47.3, 44.7, 35.0, 34.5, 25.2. HRMS (ESI+)  $m/z$  calcd. for  $\text{C}_{21}\text{H}_{19}\text{NO}_2$   $[\text{M}+\text{H}]^+$ : 318.1489; found: 318.1493. UPC<sup>2</sup>: IC,  $\text{CO}_2/i\text{-PrOH}$  gradient,  $3.0\text{ mL}\cdot\text{min}^{-1}$ ;  $t_{\text{major}} = 4.37\text{ min}$ ;  $t_{\text{minor}} = 4.71\text{ min}$ .

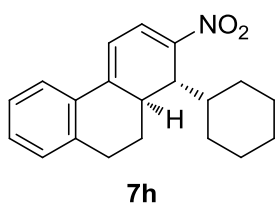

Isolated after 48 h of reaction time as a yellow oil by FC on silica gel using  $\text{CH}_2\text{Cl}_2/\text{pentane}$  1:3 as eluent.  $[\alpha]_D^{22} = +93.0$  (c 0.2 in  $\text{CH}_2\text{Cl}_2$ ).  $^1\text{H}$  NMR (400 MHz,  $\text{CDCl}_3$ )  $\delta$  7.55 (d,  $J = 6.9\text{ Hz}$ , 1H), 7.43 (dd,  $J = 7.7, 1.0\text{ Hz}$ , 1H), 7.31–7.13 (m, 3H), 6.13 (dd,  $J = 6.7, 1.0\text{ Hz}$ , 1H), 3.16 (ddd,  $J = 18.0, 11.9, 6.4\text{ Hz}$ , 1H), 3.03 (t,  $J = 3.0\text{ Hz}$ , 1H), 2.95 (dd,  $J = 17.8, 6.1\text{ Hz}$ , 1H), 2.29 (d,  $J = 13.9\text{ Hz}$ , 1H), 2.06 (dq,  $J = 12.7, 6.3\text{ Hz}$ , 1H), 1.84–1.55 (m, 6H), 1.31–1.18 (m, 3H), 1.18–0.98 (m, 2H), 0.97–0.85 (m, 1H).  $^{13}\text{C}$  NMR (100 MHz,  $\text{CDCl}_3$ )  $\delta$  150.8, 146.1, 137.5, 135.9, 129.3, 129.1, 128.5, 126.2, 124.7, 114.0, 43.7, 42.4, 39.1, 34.9, 30.1, 28.8, 27.2, 26.4, 26.3, 26.2. HRMS (ESI+)  $m/z$  calcd. for  $\text{C}_{20}\text{H}_{23}\text{NO}_2$   $[\text{M}+\text{H}]^+$ : 310.1802; found: 310.1802. UPC<sup>2</sup>: ID,  $\text{CO}_2/i\text{-PrOH}$  gradient,  $3.0\text{ mL}\cdot\text{min}^{-1}$ ;  $t_{\text{major}} = 3.33\text{ min}$ ;  $t_{\text{minor}} = 3.47\text{ min}$ .

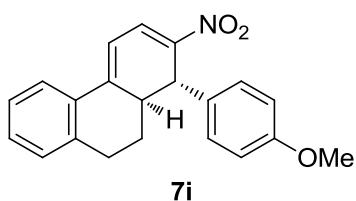

Isolated after 48 h of reaction time as a yellow solid by FC on silica gel using CH<sub>2</sub>Cl<sub>2</sub>/pentane 1:1→2:1 as eluent.  $[\alpha]_D^{22} = -40.0$  (c 0.2 in CH<sub>2</sub>Cl<sub>2</sub>). <sup>1</sup>H NMR (400 MHz, CDCl<sub>3</sub>) δ 7.77 (dd, *J* = 7.3, 1.8 Hz, 1H), 7.44 (dd, *J* = 6.8, 1.8 Hz, 1H), 7.28-7.19 (m, 4H), 7.11 (d, *J* = 6.9 Hz, 1H), 6.88–6.83 (m, 2H), 6.62 (dd, *J* = 6.9, 2.5 Hz, 1H), 4.02 (dd, *J* = 13.4, 1.4 Hz, 1H), 3.79 (s, 3H), 3.05-2.95 (m, 1H), 2.86–2.72 (m, 2H), 1.99–1.91 (m, 1H), 1.78 (dq, *J* = 12.6, 5.9 Hz, 1H).

<sup>13</sup>C NMR (100 MHz, CDCl<sub>3</sub>) δ 158.7, 148.8, 145.1, 138.6, 134.7, 132.6, 129.5, 129.4, 128.8, 128.7 (2C), 126.6, 124.7, 114.2 (2C), 113.1, 55.3, 47.0, 46.7, 30.2, 29.9. HRMS (ESI+) *m/z* calcd. for C<sub>21</sub>H<sub>19</sub>NO<sub>3</sub> [M+H]<sup>+</sup>: 334.1438; found: 334.1441. UPC<sup>2</sup>: IB, CO<sub>2</sub>/*i*-PrOH gradient, 3.0 mL·min<sup>-1</sup>; *t*<sub>major</sub> = 4.62 min; *t*<sub>minor</sub> = 4.45 min.

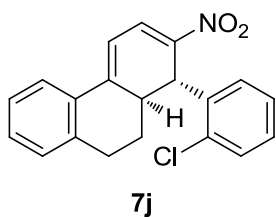

Isolated after 48 h as a yellow solid by FC on silica gel using CH<sub>2</sub>Cl<sub>2</sub>/pentane 2:1 as eluent.  $[\alpha]_D^{22} = -168.8$  (c 0.5 in CH<sub>2</sub>Cl<sub>2</sub>). <sup>1</sup>H NMR (400 MHz, CDCl<sub>3</sub>) δ 7.72–7.66 (m, 1H), 7.57 (dd, *J* = 6.9, 1.9 Hz, 1H), 7.44–7.40 (m, 1H), 7.34–7.29 (m, 1H), 7.29–7.17 (m, 4H), 7.15–7.09 (m, 1H), 6.63 (dd, *J* = 6.9, 2.4 Hz, 1H), 4.77 (d, *J* = 12.9 Hz, 1H), 3.07 (t, *J* = 12.9 Hz, 1H), 2.89–2.75 (m, 2H), 2.06–1.97 (m, 1H), 1.90 (qd, *J* = 12.6, 5.9 Hz, 1H). <sup>13</sup>C NMR (100 MHz, CDCl<sub>3</sub>) δ 147.6, 145.6, 140.2, 138.6, 134.2, 132.6,

130.0, 129.9, 129.6, 129.4, 128.2, 127.4 (bs), 127.3, 126.6, 124.7, 113.1, 46.2 (bs), 43.5 (bs), 30.17, 29.37. HRMS (ESI+) *m/z* calcd. for C<sub>20</sub>H<sub>16</sub>ClNO<sub>2</sub> [M+H]<sup>+</sup>: 338.0942; found: 338.0939. UPC<sup>2</sup>: IB, CO<sub>2</sub>/*i*-PrOH gradient, 3.0 mL·min<sup>-1</sup>; *t*<sub>major</sub> = 4.66 min; *t*<sub>minor</sub> = 4.44 min.

## 4. X-Ray structures and crystal data

Compound **5p**

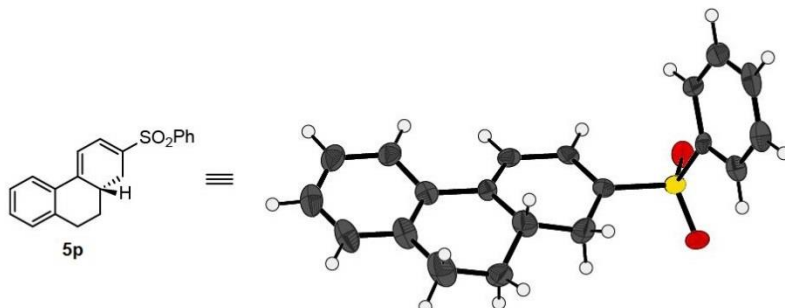

| Item                         | Value                                            |
|------------------------------|--------------------------------------------------|
| Molecular formula            | C <sub>20</sub> H <sub>18</sub> O <sub>2</sub> S |
| Formula weight               | 322.4                                            |
| Crystal system               | triclinic                                        |
| Space group                  | P1                                               |
| a (Å)                        | 8.0288                                           |
| b (Å)                        | 9.2244                                           |
| c (Å)                        | 11.46                                            |
| α (°)                        | 103.126                                          |
| β (°)                        | 98.144                                           |
| γ (°)                        | 98.902                                           |
| Volume (Å <sup>3</sup> )     | 802.7                                            |
| Z                            | 2                                                |
| T (K)                        | 100                                              |
| ρ (g cm <sup>-1</sup> )      | 1.334                                            |
| λ (Å)                        | 0.56086                                          |
| μ (mm <sup>-1</sup> )        | 0.115                                            |
| # measured refl              | 36305                                            |
| # unique refl                | 7505                                             |
| R <sub>int</sub>             | 0.0489                                           |
| # parameters                 | 415                                              |
| R(F <sup>2</sup> ), all refl | 0.0798                                           |

|                       |        |
|-----------------------|--------|
| $R_w(F^2)$ , all refl | 0.1354 |
| Goodness of fit       | 1.057  |

Crystal data for **[5p]**:  $C_{20}H_{18}O_2S$ ,  $M = 322.4$ , triclinic, space group P1 (no. 1),  $a = 8.0288(16)$  Å,  $b = 9.2244(19)$  Å,  $c = 11.46(3)$  Å,  $\alpha = 103.126(5)^\circ$ ,  $\beta = 98.144(7)^\circ$ ,  $\gamma = 98.902(5)^\circ$ ,  $V = 802.7(3)$  Å<sup>3</sup>,  $T = 100$  K,  $Z = 2$ ,  $d_c = 1.334$  g cm<sup>-3</sup>,  $\mu(\text{Mo K}\alpha, \lambda = 0.56086 \text{ \AA}) = 0.115$  mm<sup>-1</sup>, 36305 reflections collected, 7505 unique [ $R_{\text{int}} = 0.0489$ ], which were used in all calculations. Refinement on  $F^2$ , final  $R(F) = 0.0798$ ,  $R_w(F^2) = 0.1354$ . CCDC number 971515.

### Compound **7j**

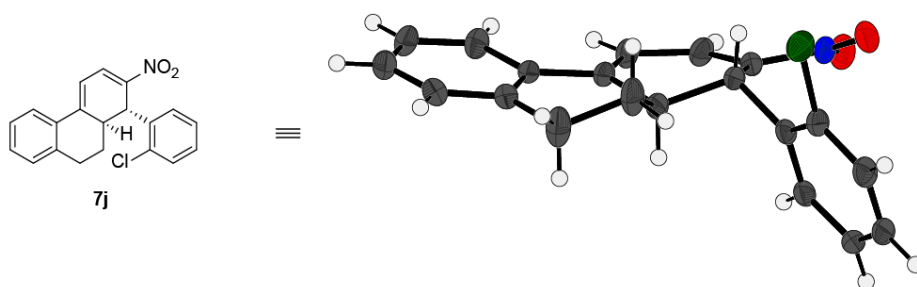

| Item                         | Value                |
|------------------------------|----------------------|
| Molecular formula            | $C_{20}H_{16}ClNO_2$ |
| Formula weight               | 337.79               |
| Crystal system               | orthorhombic         |
| Space Group                  | P 21 21 21           |
| a (Å)                        | 11.8439              |
| b (Å)                        | 11.8914              |
| c (Å)                        | 22.4284              |
| $\alpha$ (°)                 | 90                   |
| $\beta$ (°)                  | 90                   |
| $\gamma$ (°)                 | 90                   |
| Volume (Å <sup>3</sup> )     | 3158.84              |
| Z                            | 8                    |
| T (K)                        | 100                  |
| $\rho$ (g cm <sup>-1</sup> ) | 1.421                |
| $\lambda$ (Å)                | 0.71073              |
| $\mu$ (mm <sup>-1</sup> )    | 0.254                |
| # measured refl              | 25699                |
| # unique refl                | 10247                |
| $R_{\text{int}}$             | 0.0636               |
| # parameters                 | 442                  |
| $R(F^2)$ , all refl          | 0.0918               |
| $R_w(F^2)$ , all refl        | 0.1417               |
| Goodness of fit              | 1.04                 |

Crystal data for [7j]: C<sub>20</sub>H<sub>16</sub>ClNO<sub>2</sub>,  $M = 337.79$ , orthorhombic, space group P 21 21 21 (no. 115),  $a = 11.8439(4)$  Å,  $b = 11.8914(2)$  Å,  $c = 22.4284(6)$  Å,  $V = 3158.84(14)$  Å<sup>3</sup>,  $T = 100$  K,  $Z = 8$ ,  $d_c = 1.421$  g cm<sup>-3</sup>,  $\mu(\text{Mo K}\alpha, \lambda = 0.71073 \text{ \AA}) = 0.254$  mm<sup>-1</sup>, 25699 reflections collected, 10247 unique [ $R_{\text{int}} = 0.0636$ ], which were used in all calculations. Refinement on  $F^2$ , final  $R(F) = 0.0918$ ,  $R_w(F_2) = 0.1417$ . CCDC number 1009726.



## 5. NMR spectra of novel compounds

KSH-377.HNMR.10.fid

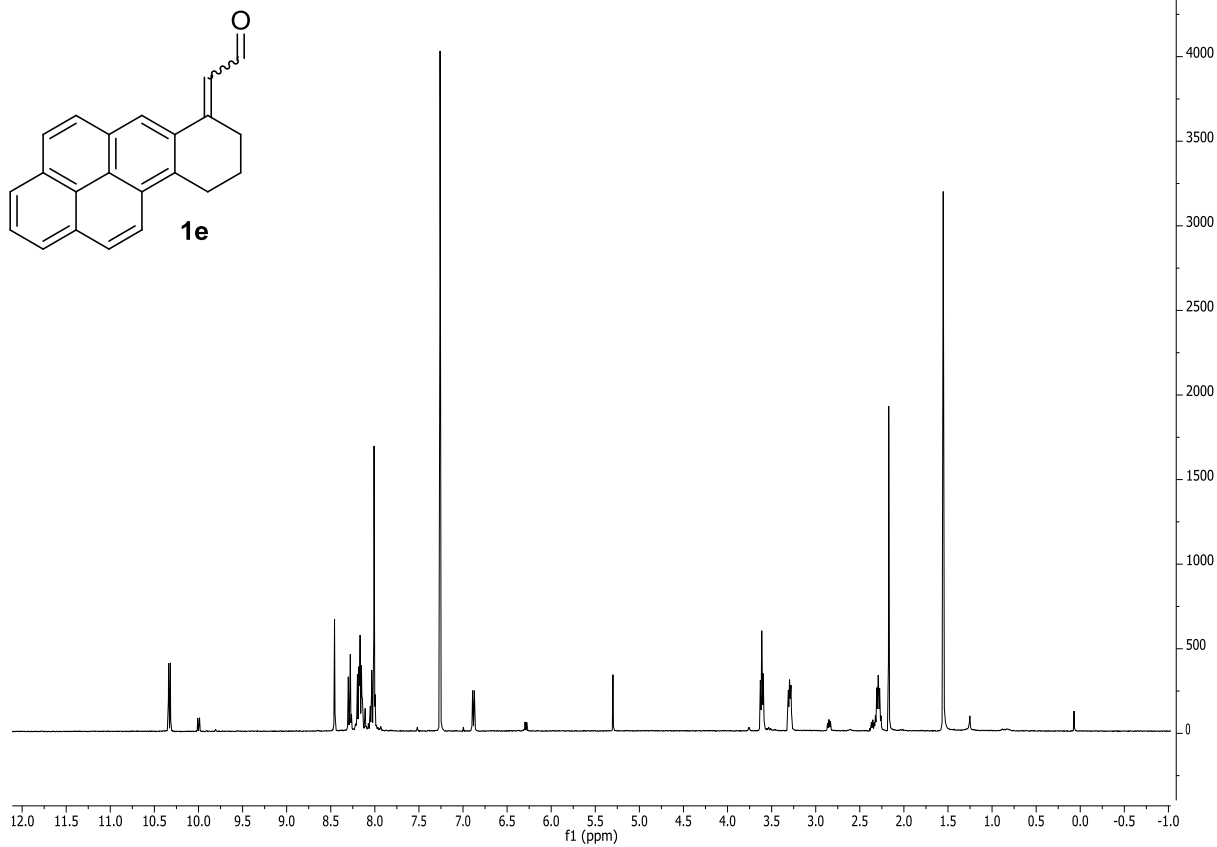

KSH-377.CNMR.2.10.fid

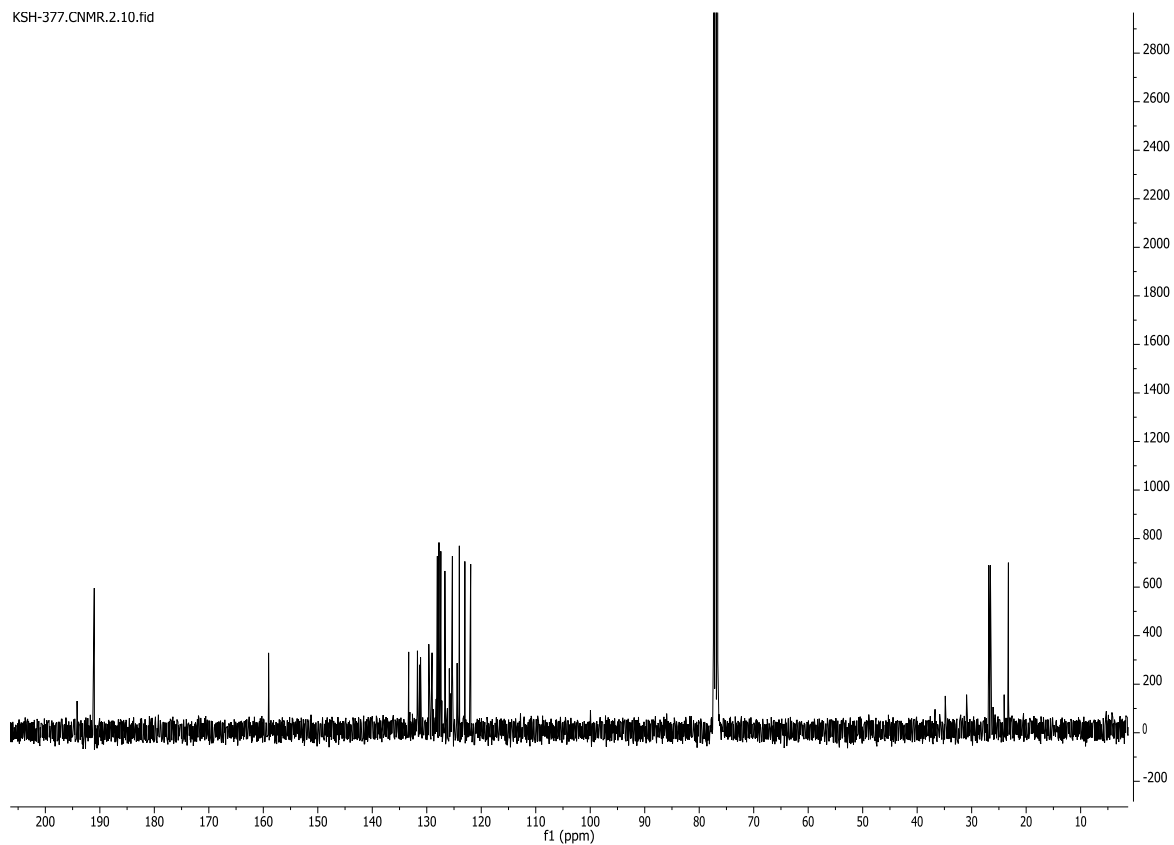

LAL-21.2.FC.H.2.10.fid

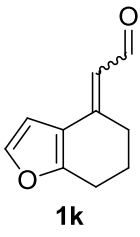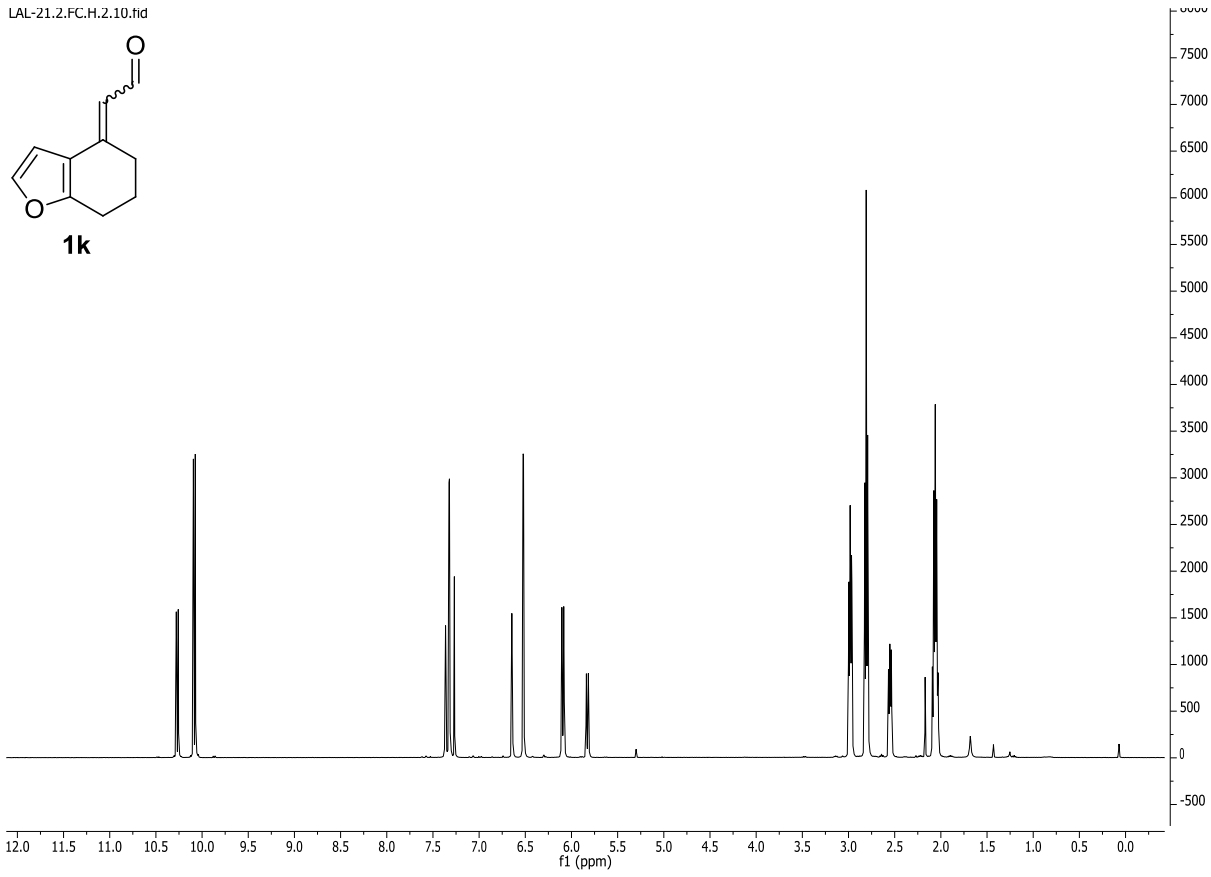

LAL-21.2.FC.C.2.10.fid

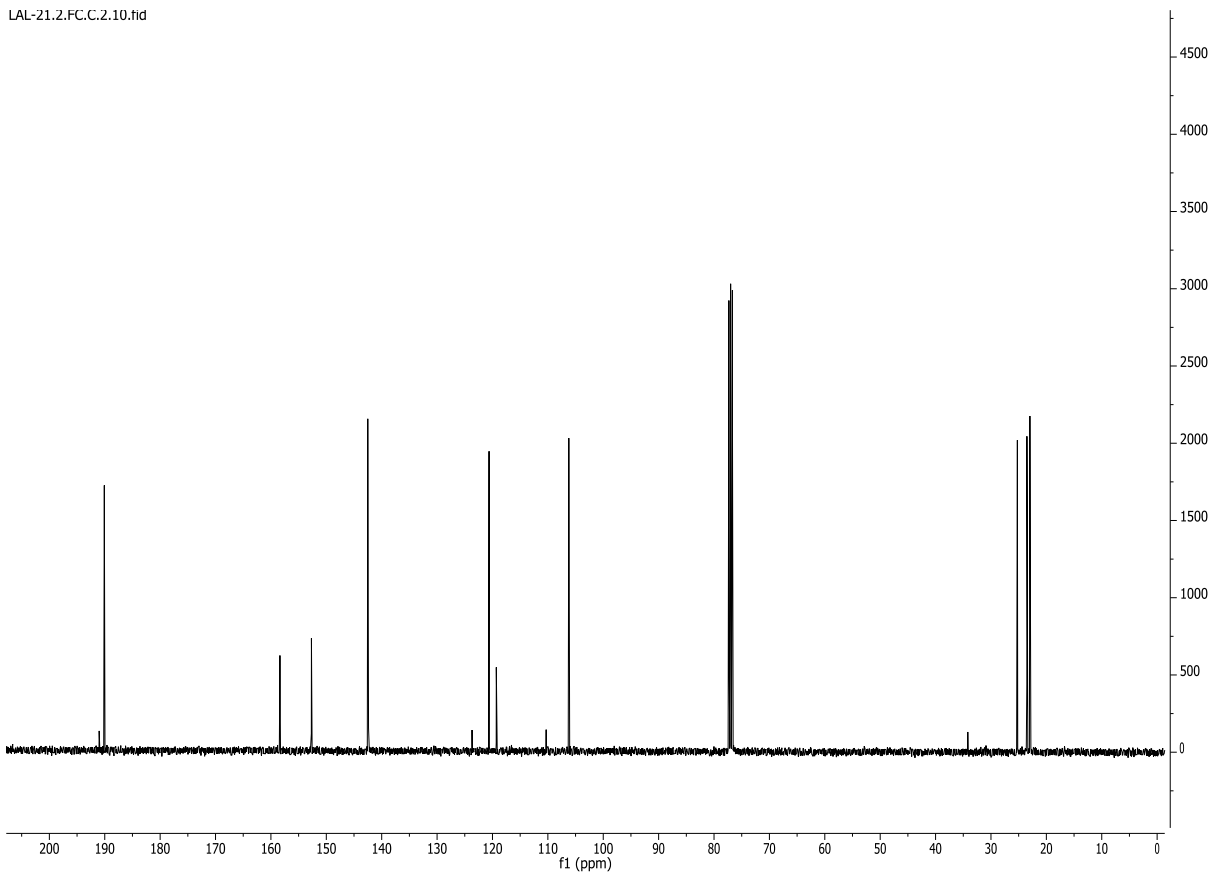

LAL-22.Z.FC.H.10.fid

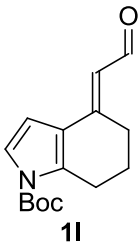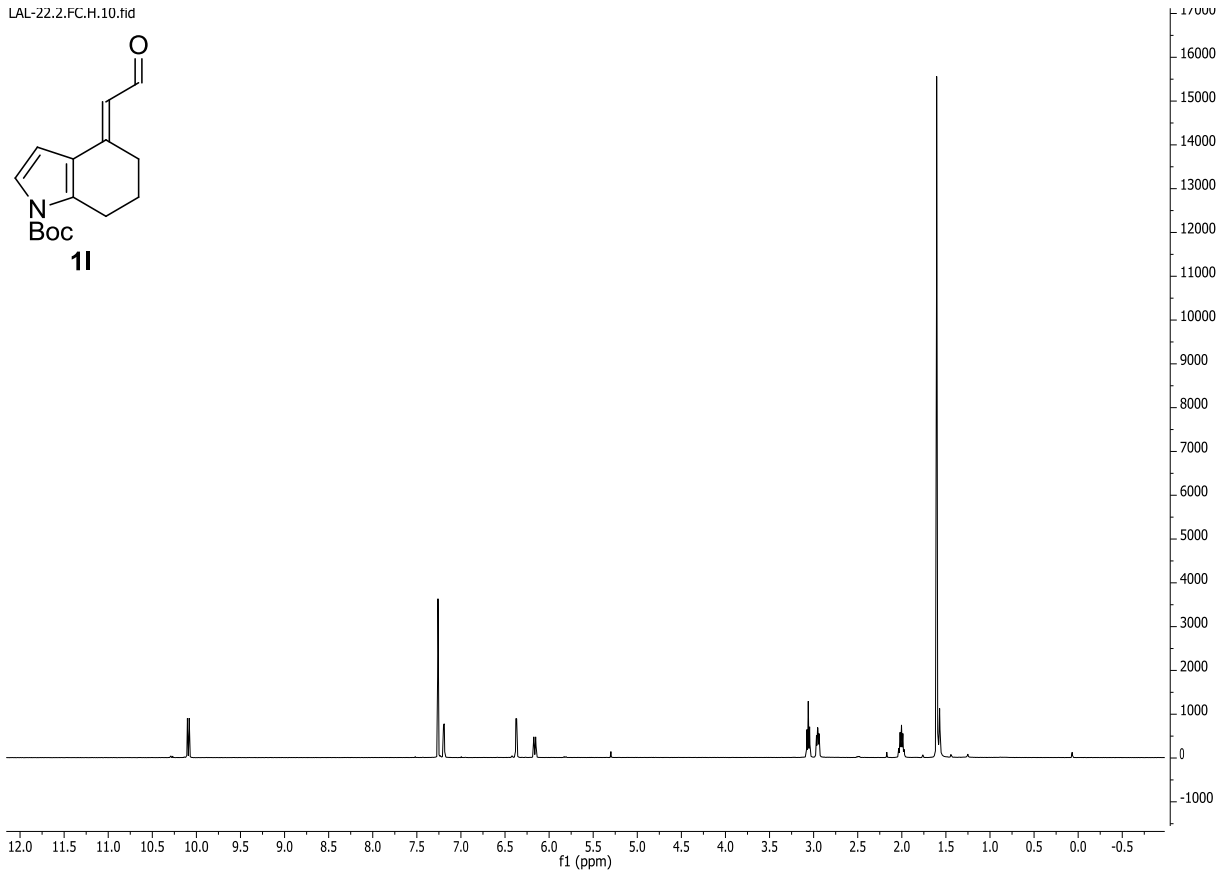

KSH.LAL-22.CNMR.10.fid

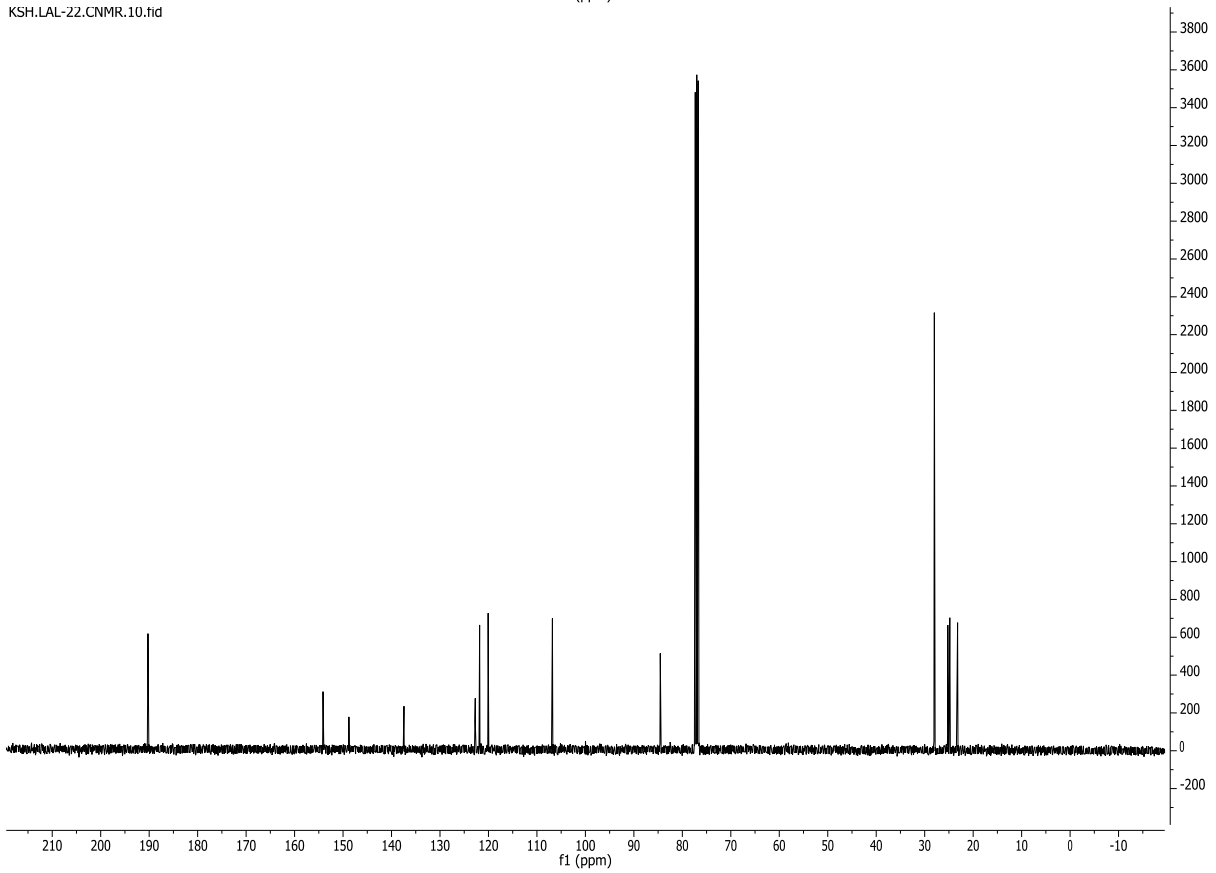

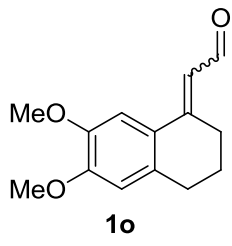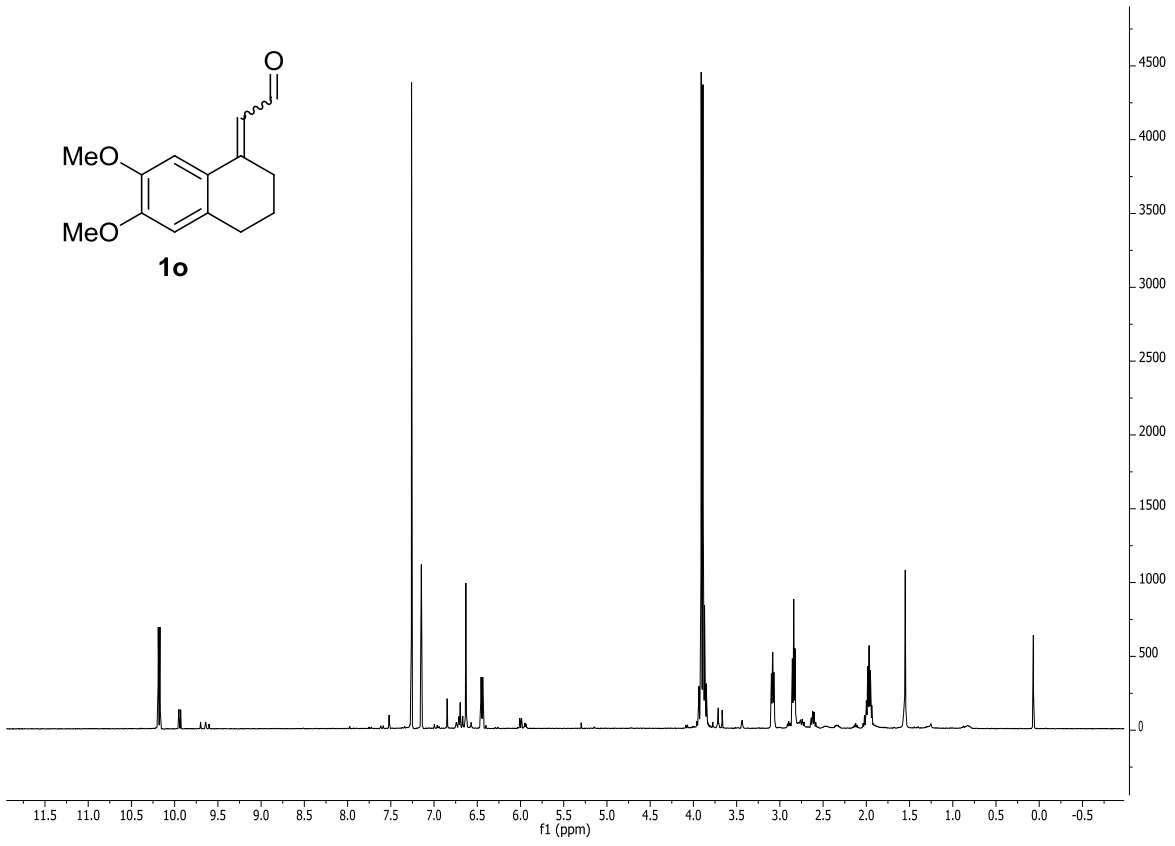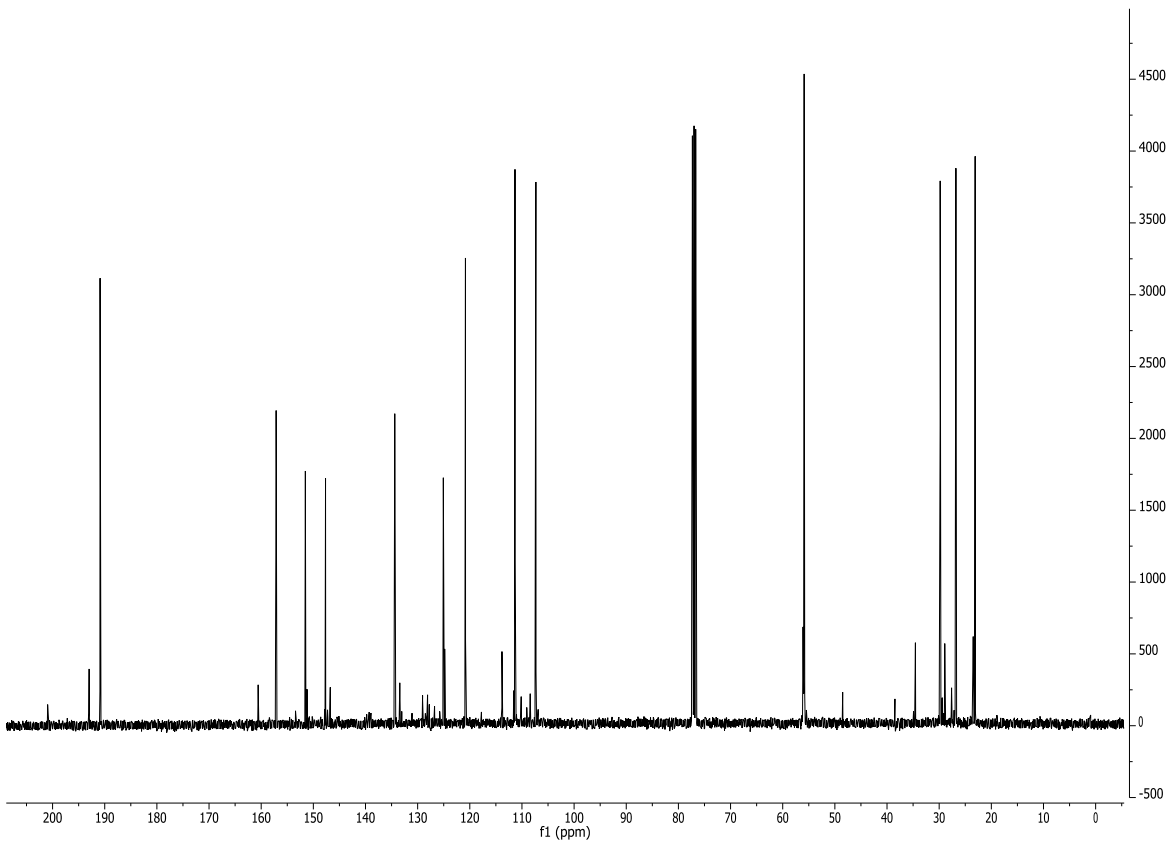

300A\_H.10.fid

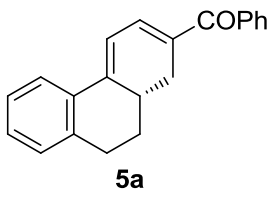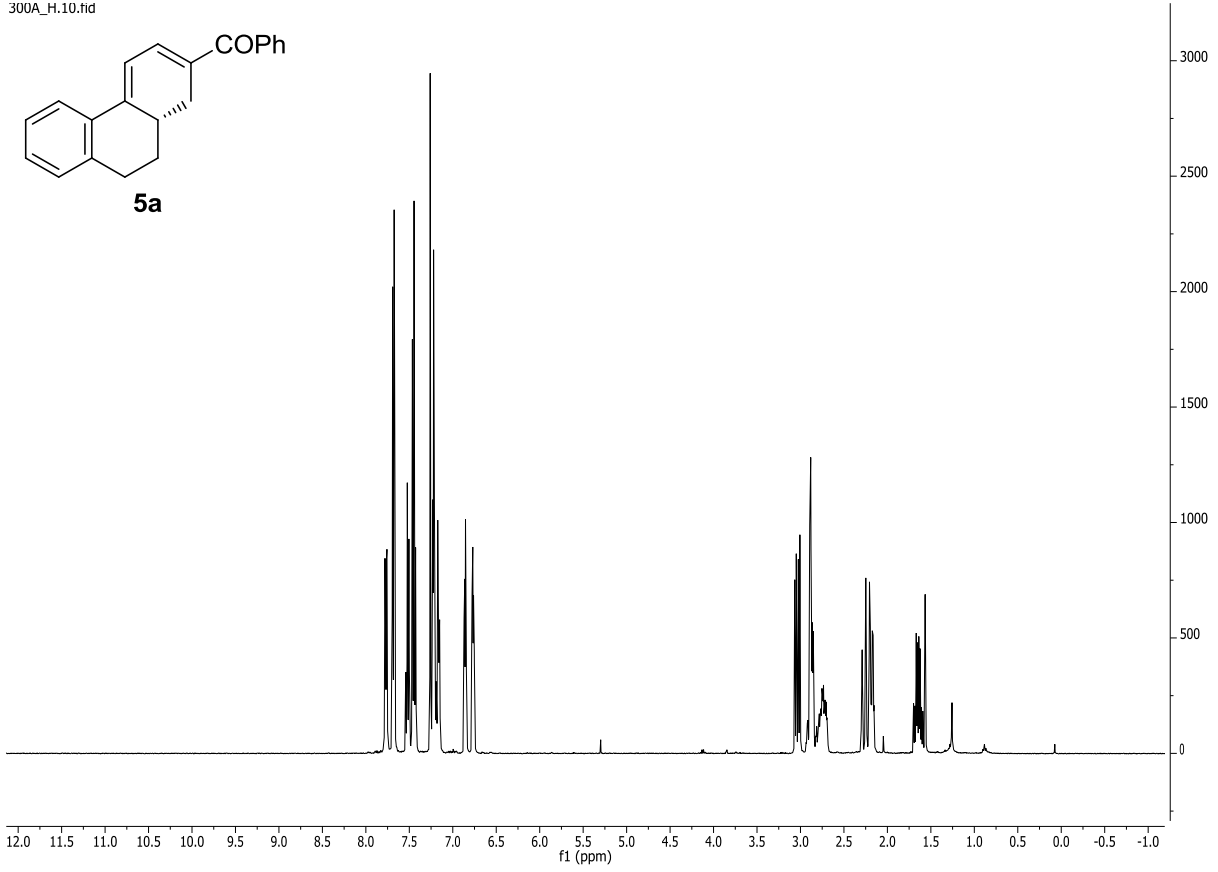

283\_C.10.fid

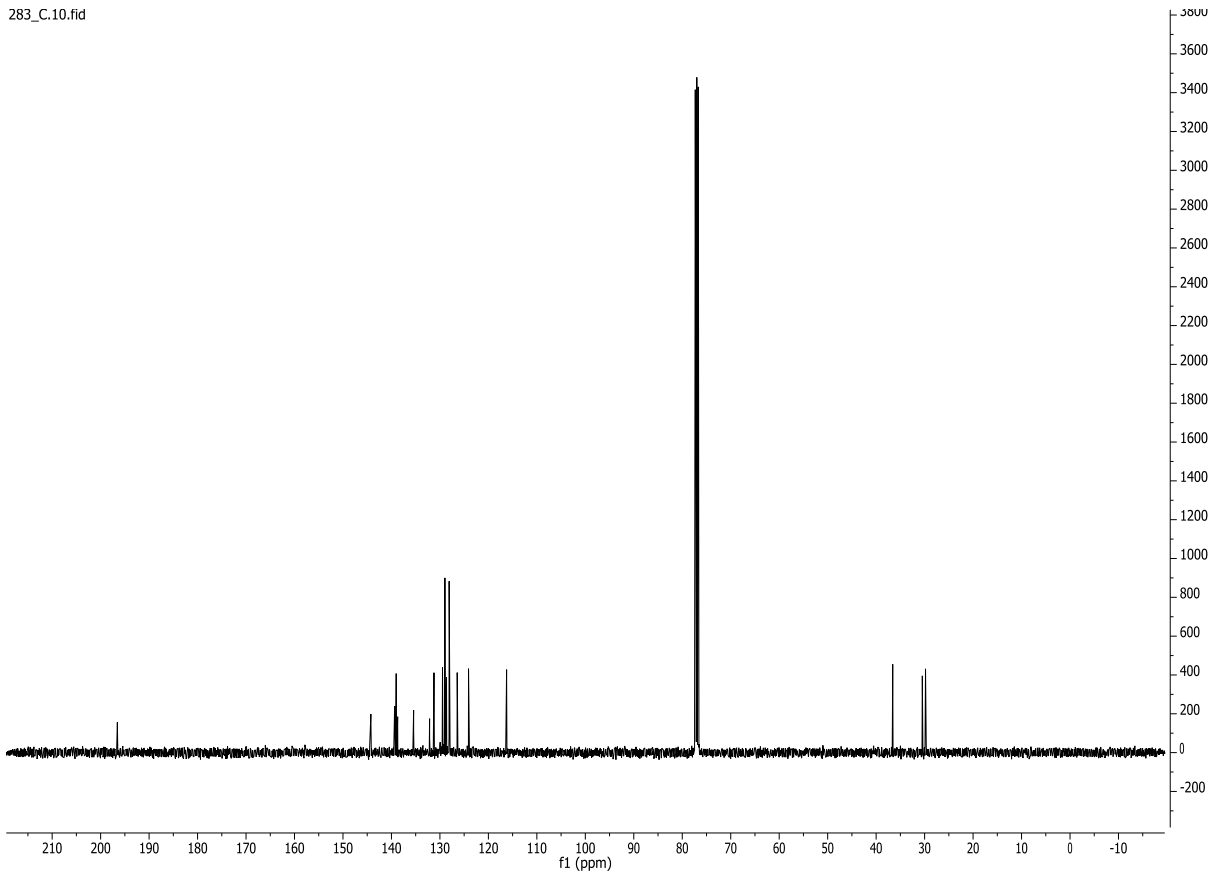

LAL27-FC.H.10.fid

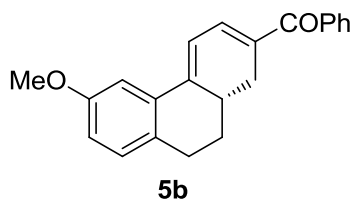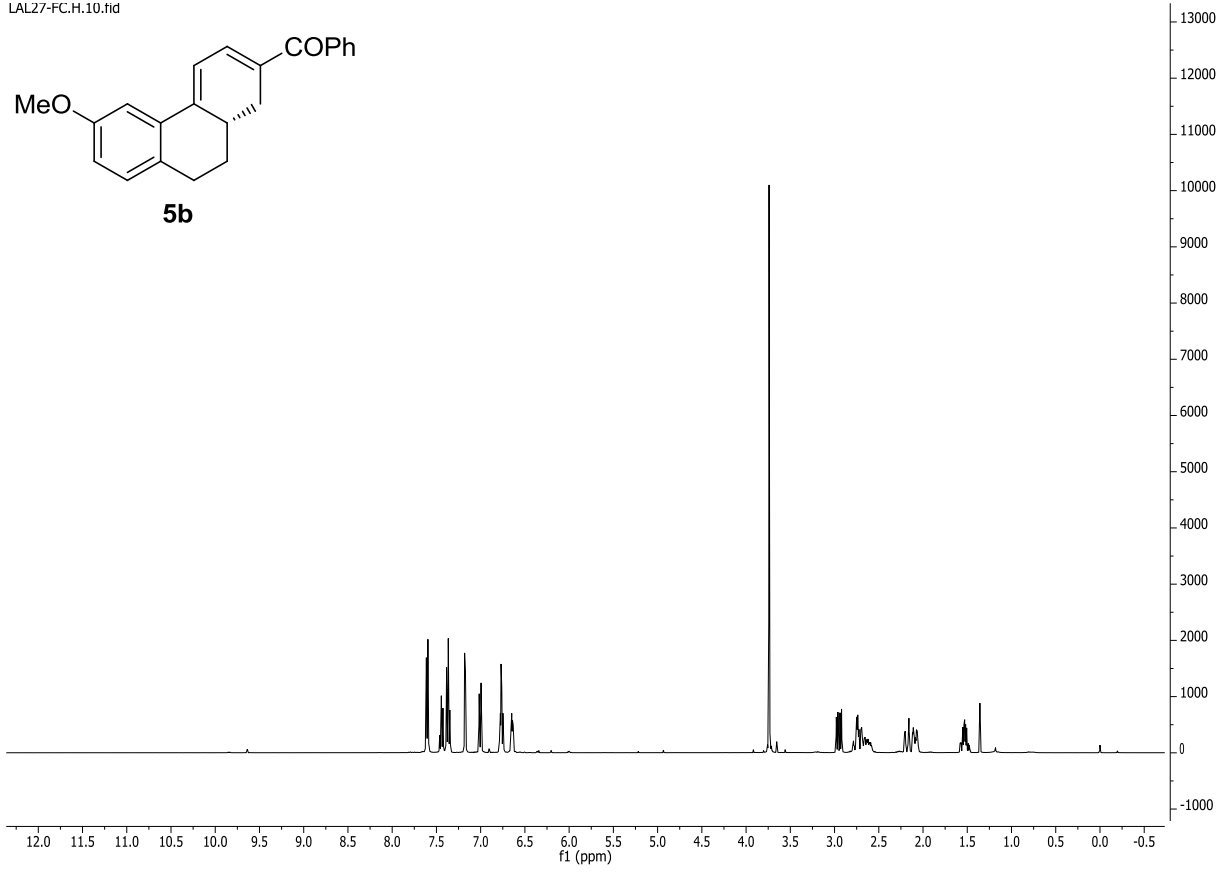

LAL27-FC.C.10.fid

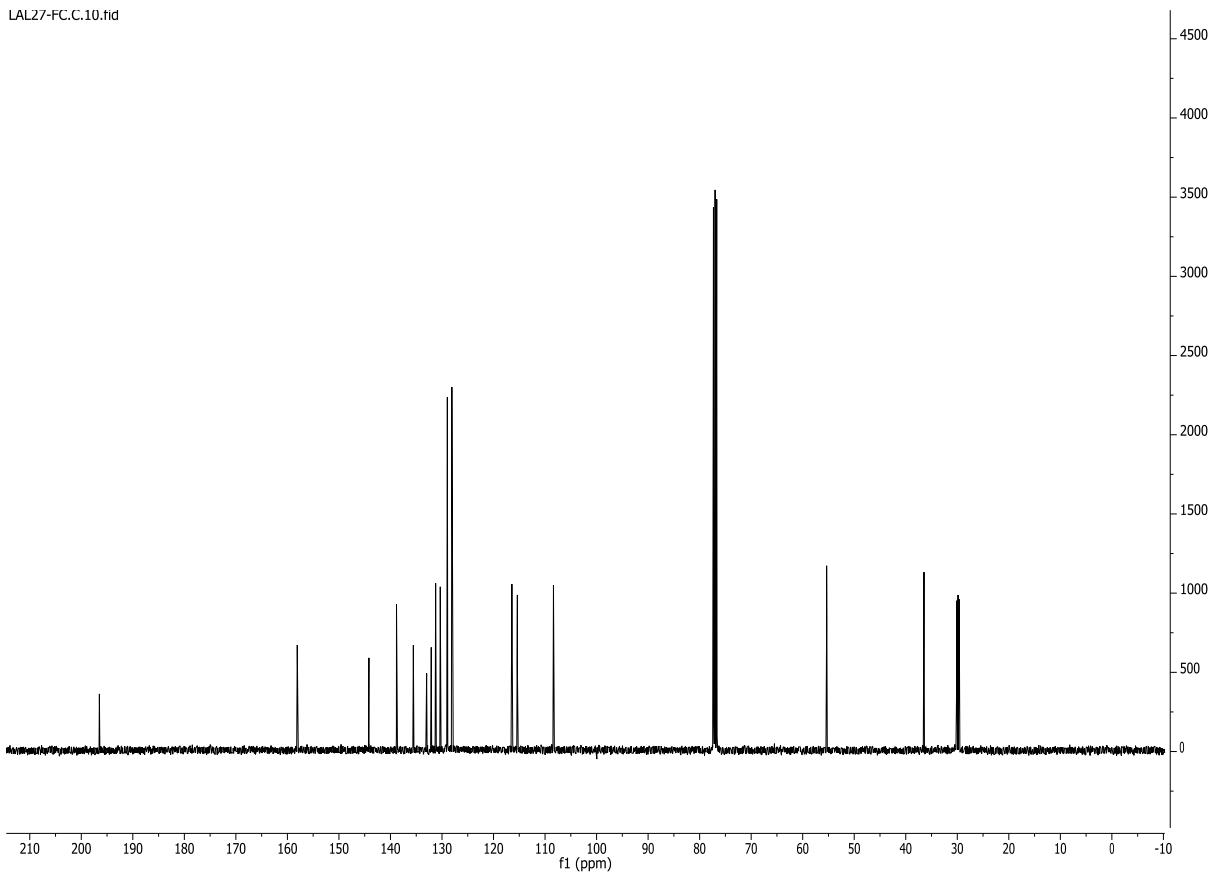

329B\_H.10.fid

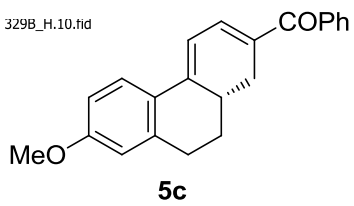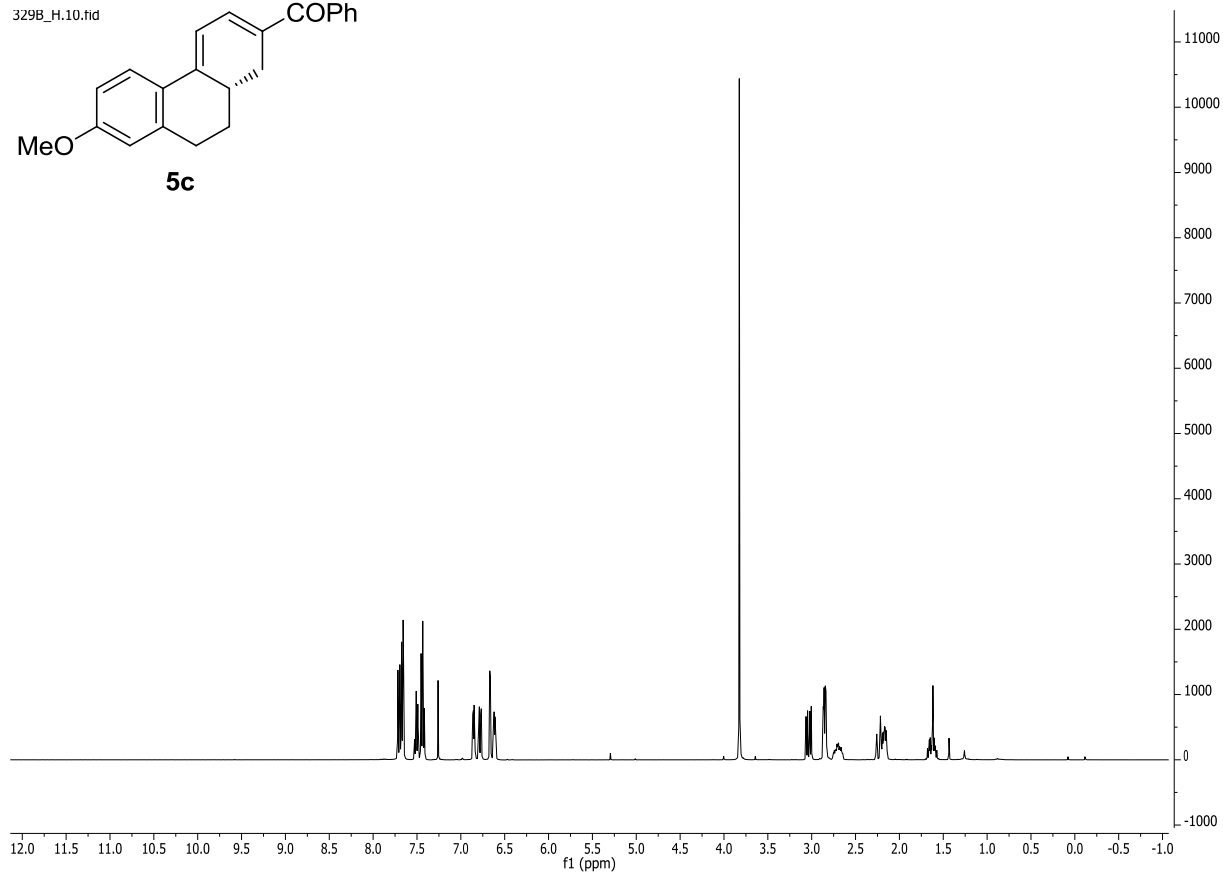

329B\_C.10.fid

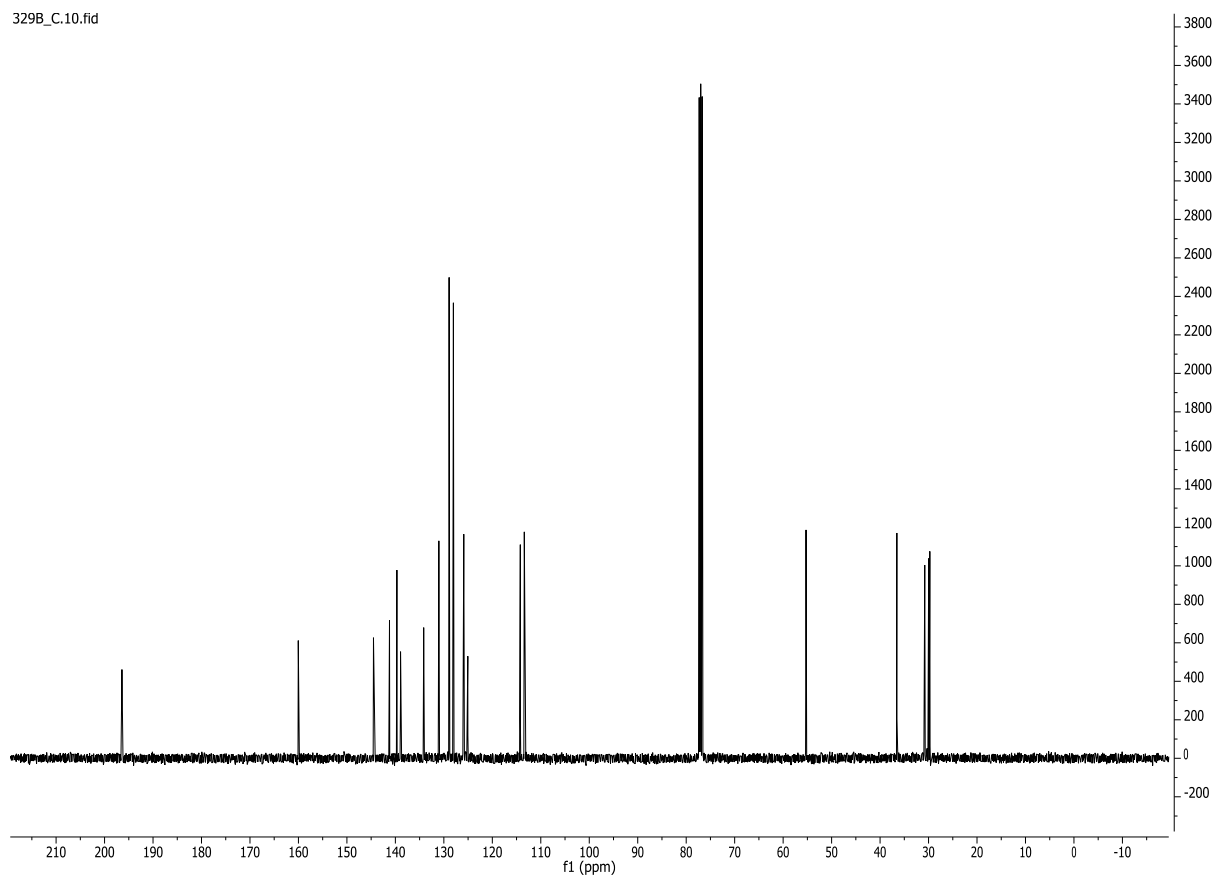

KSH-405.B.HNMR.10.fid

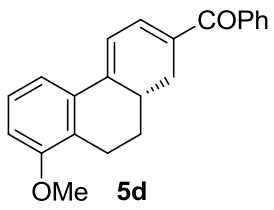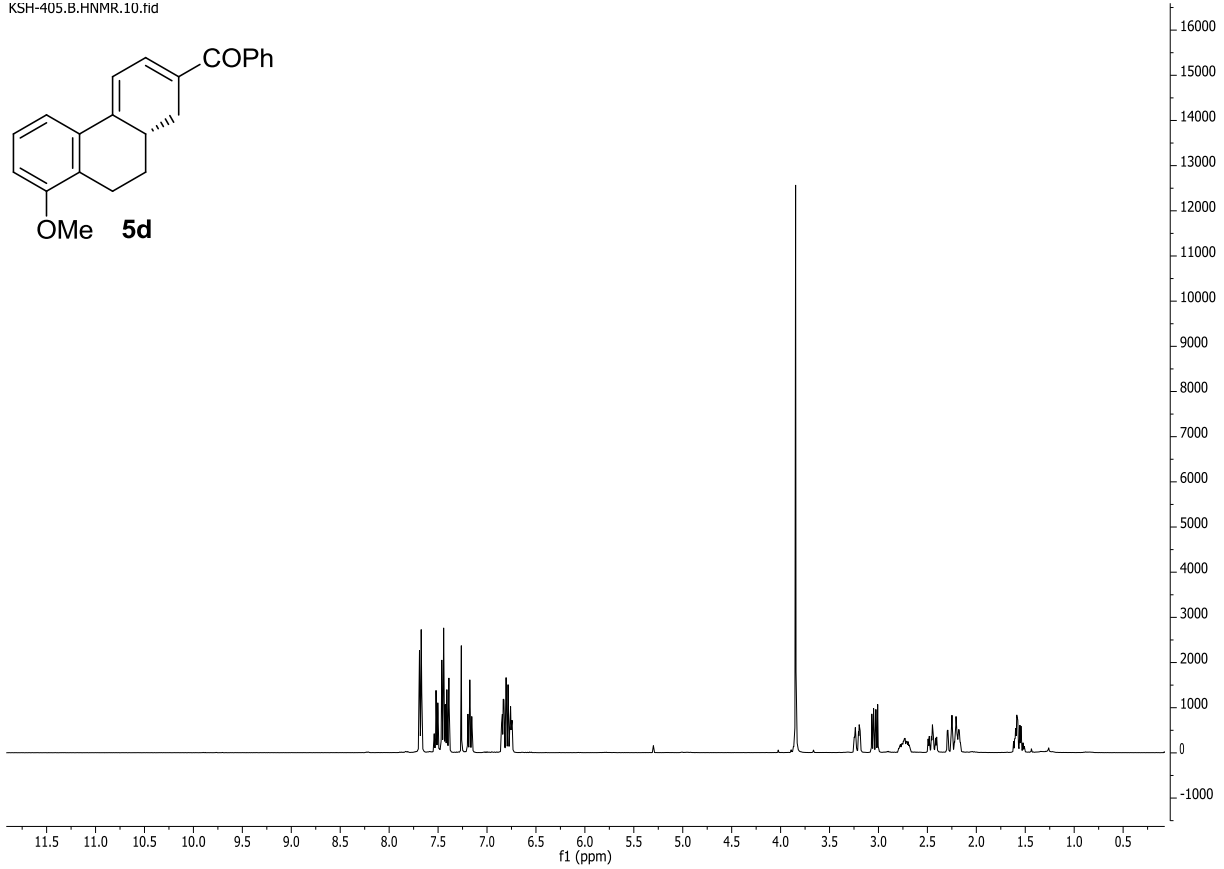

KSH-405.B.CNMR.10.fid

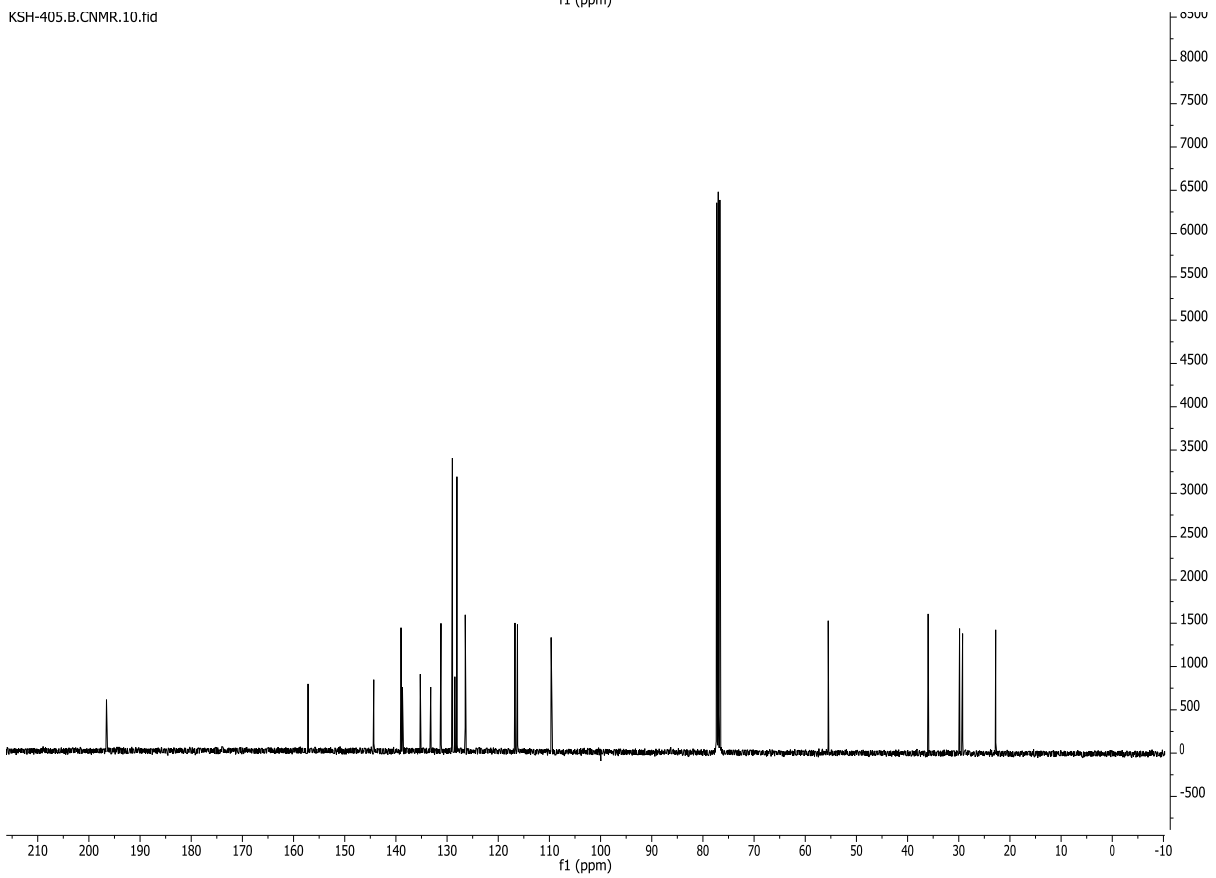



KSH-405.A.HNMR.10.fid

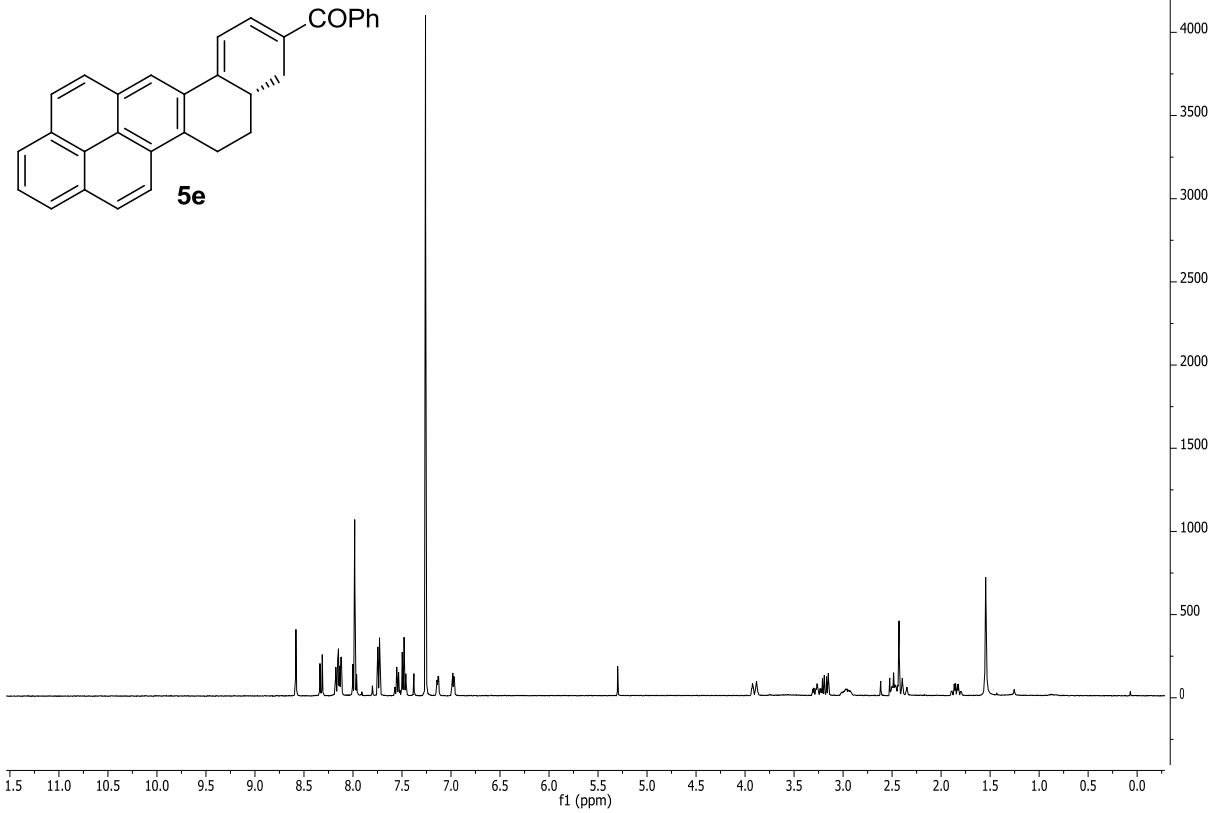

KSH-405.A.CNMR.20.fid

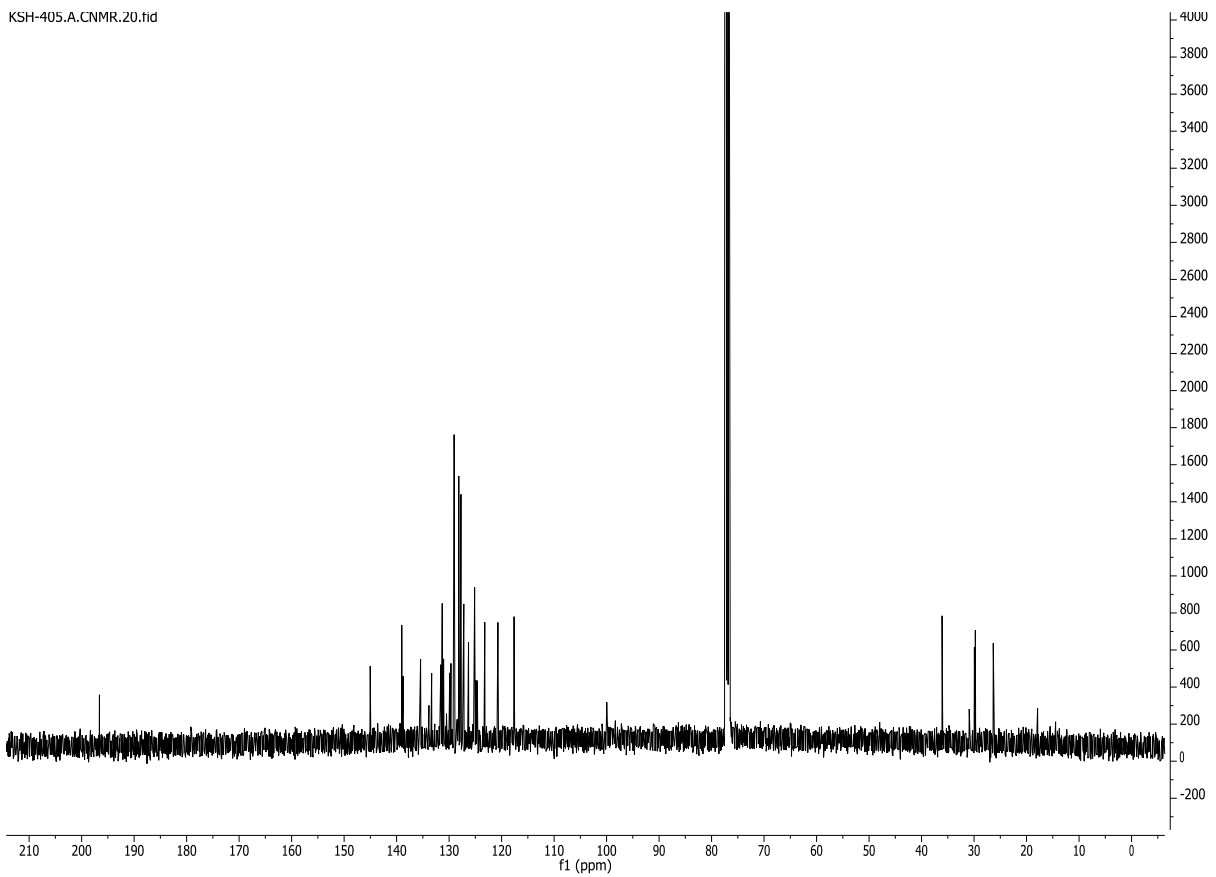

KSH-417.A.HNMR.10.fid

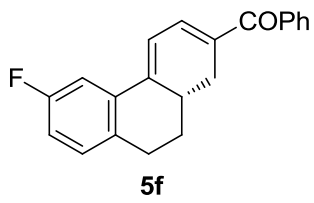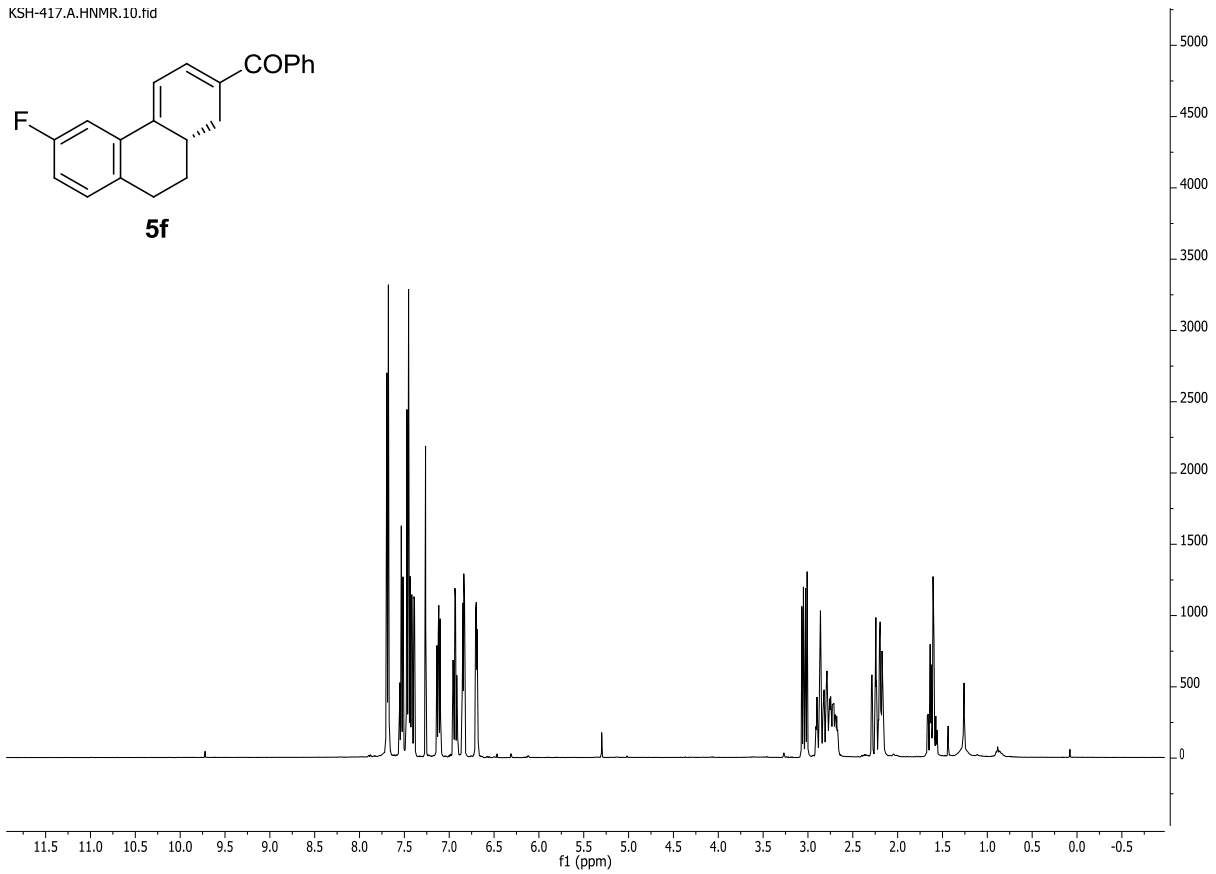

KSH-417.A.CNMR.decoupled.10.fid

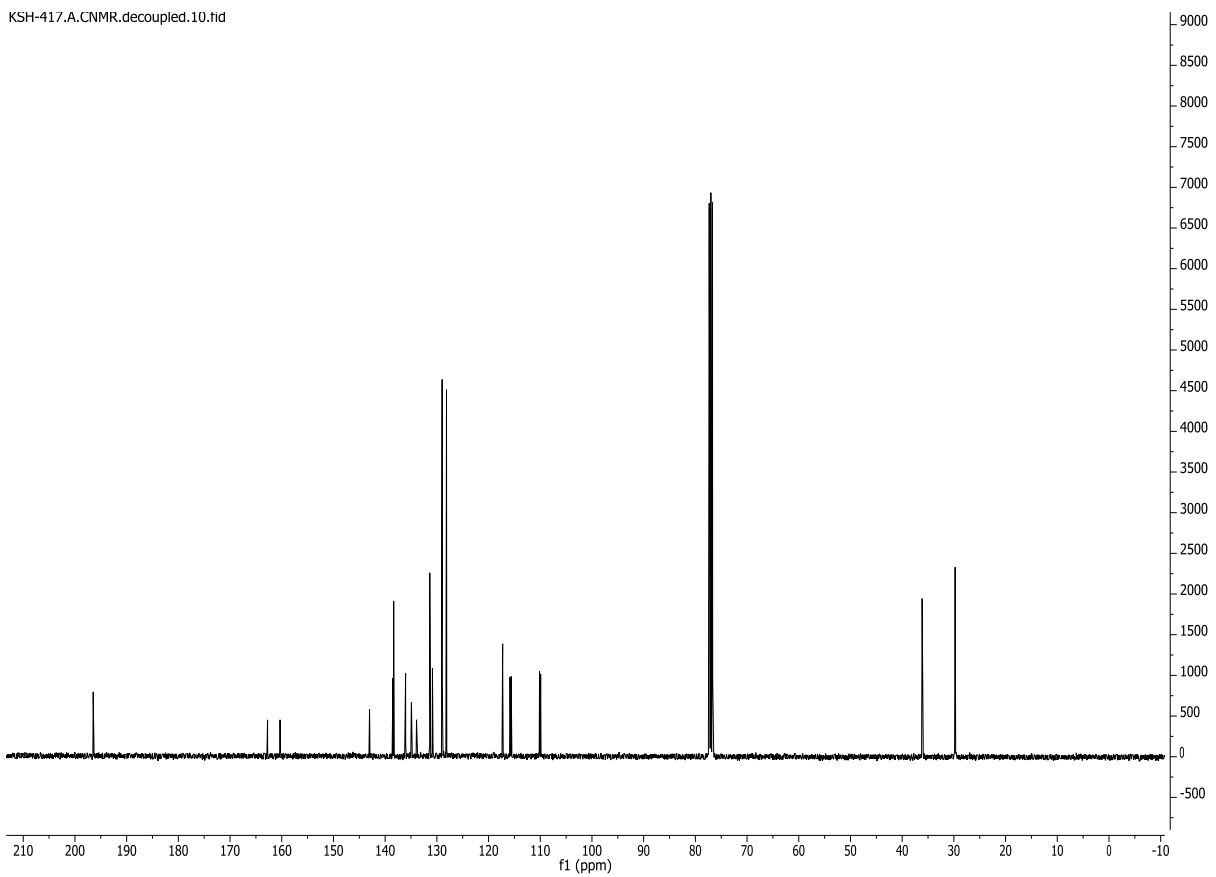

KSH-417.A.FNMR..10.fid

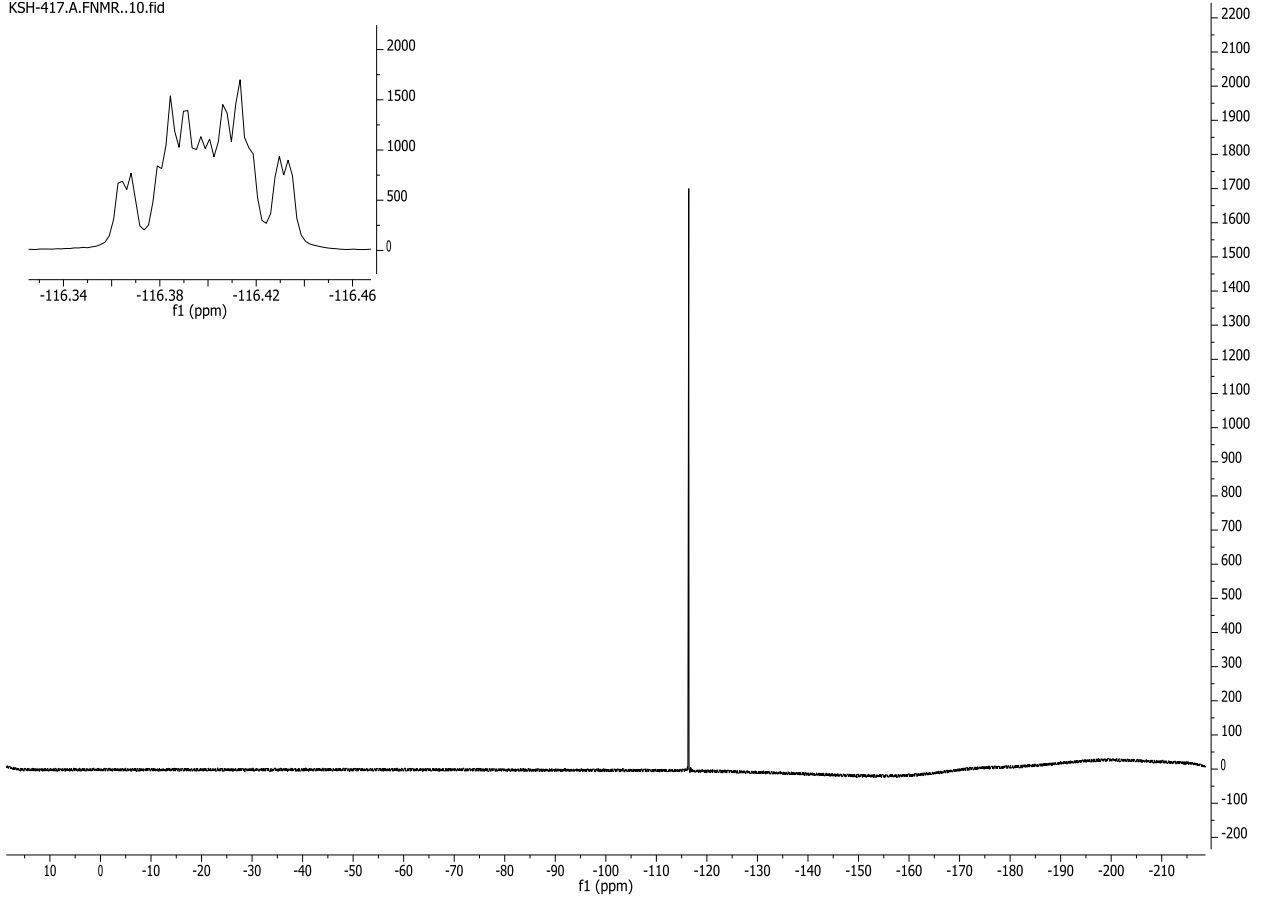

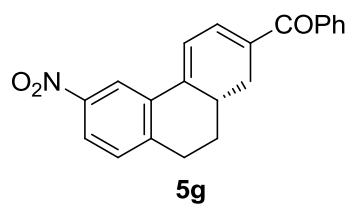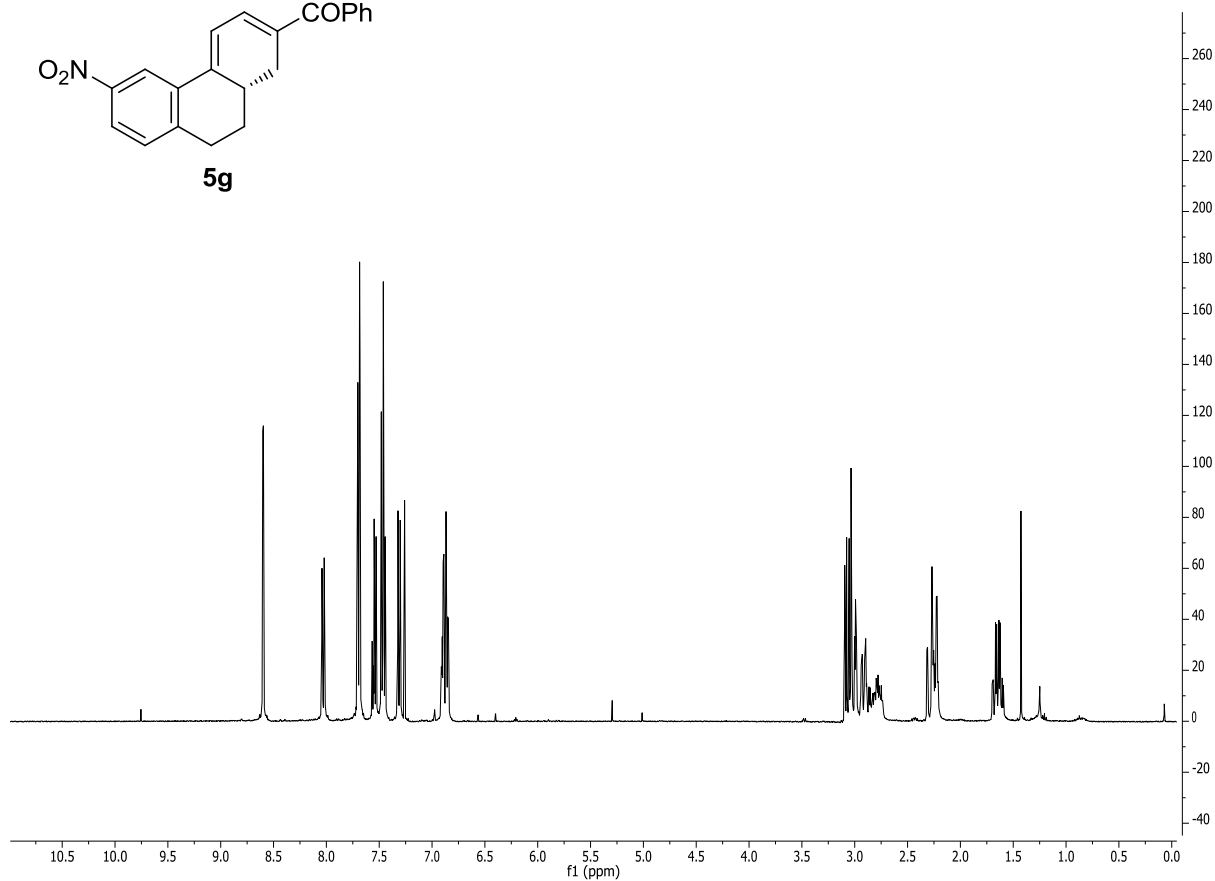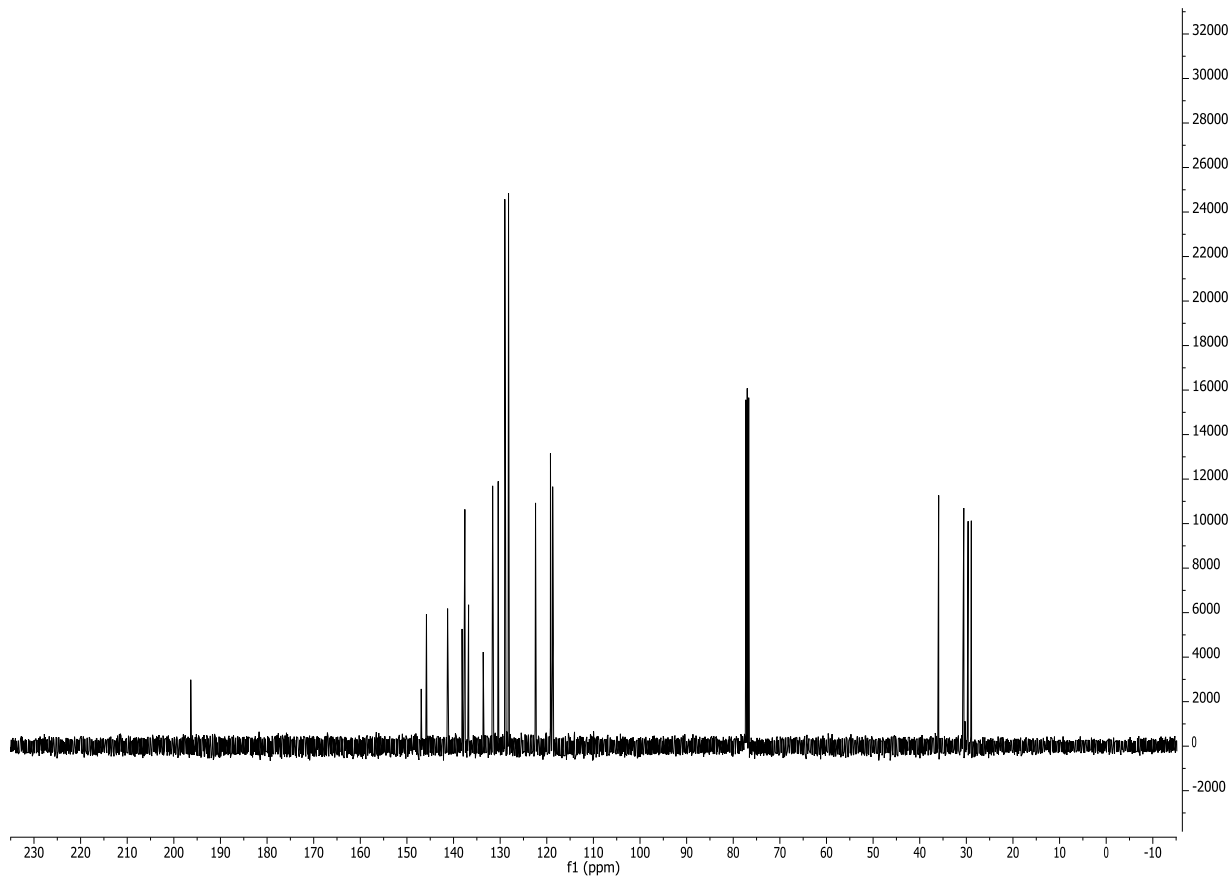

326\_H.10.fid

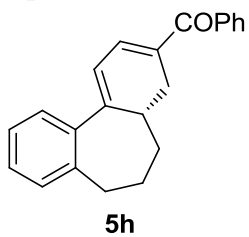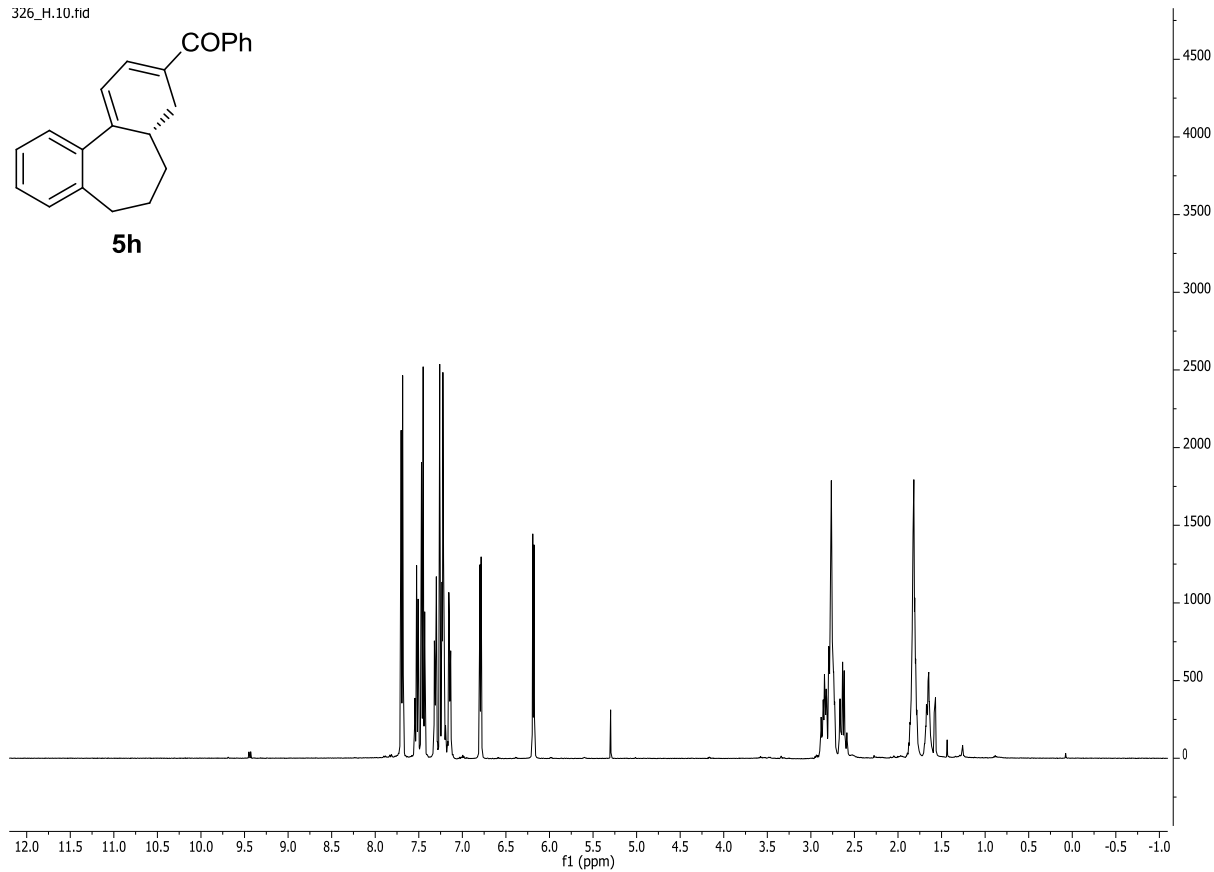

326\_C.10.fid

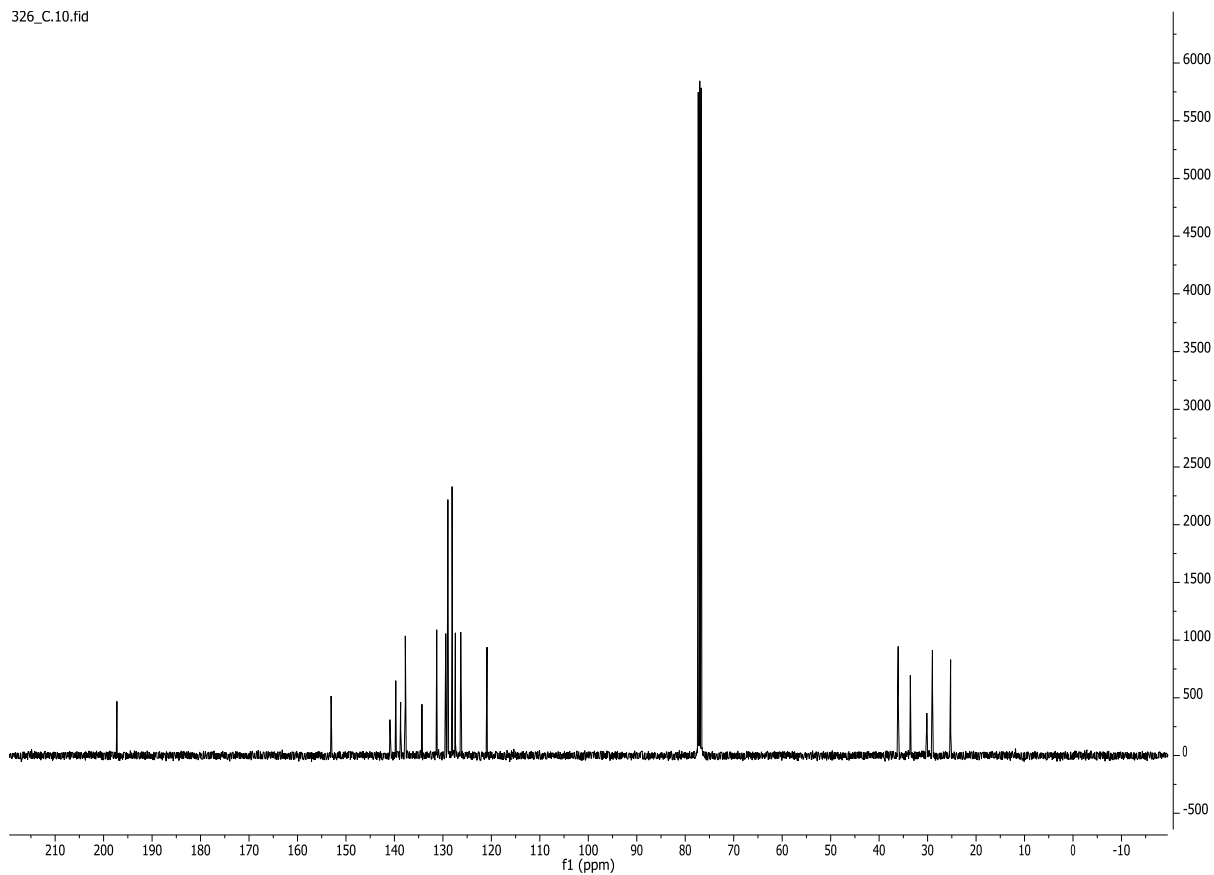

309\_H.10.fid

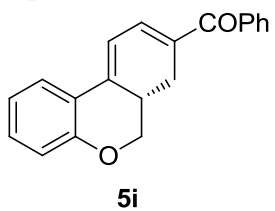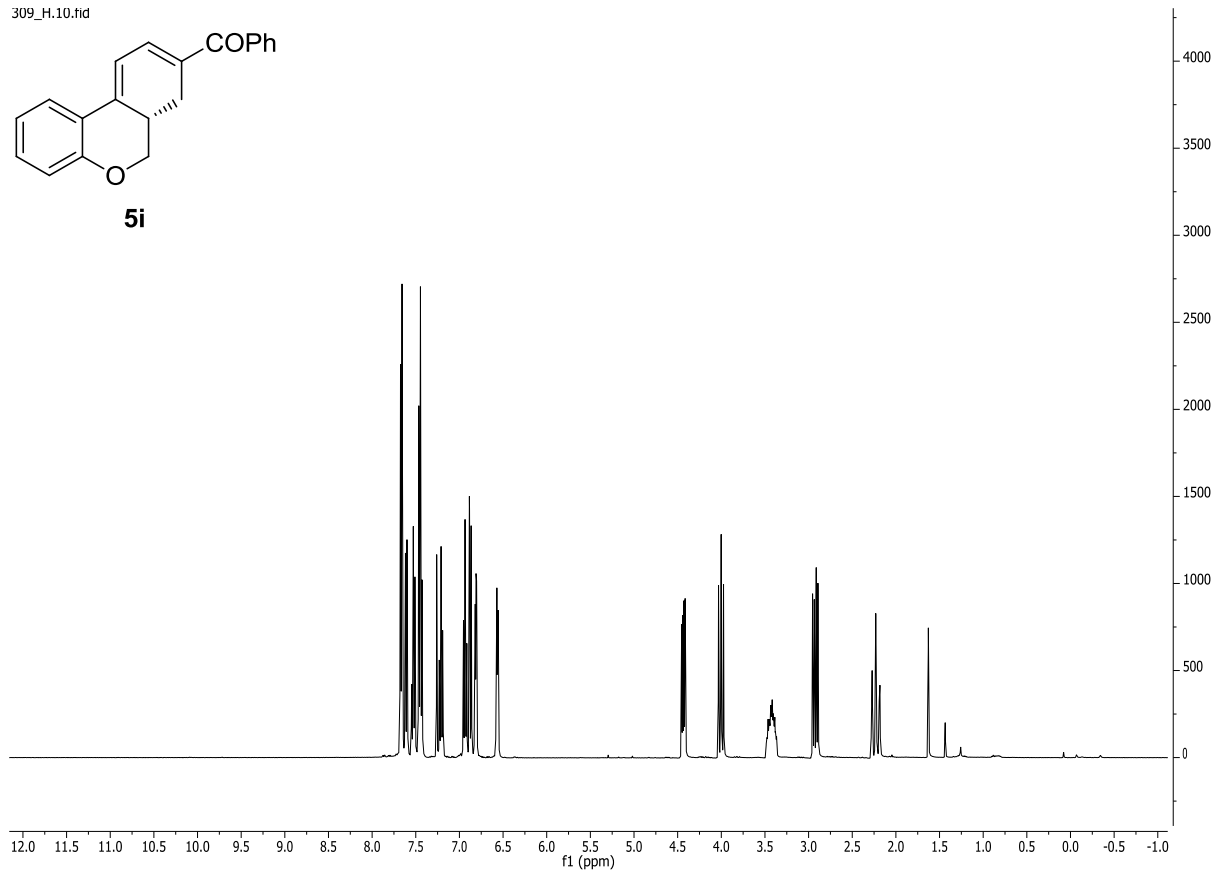

309\_C.10.fid

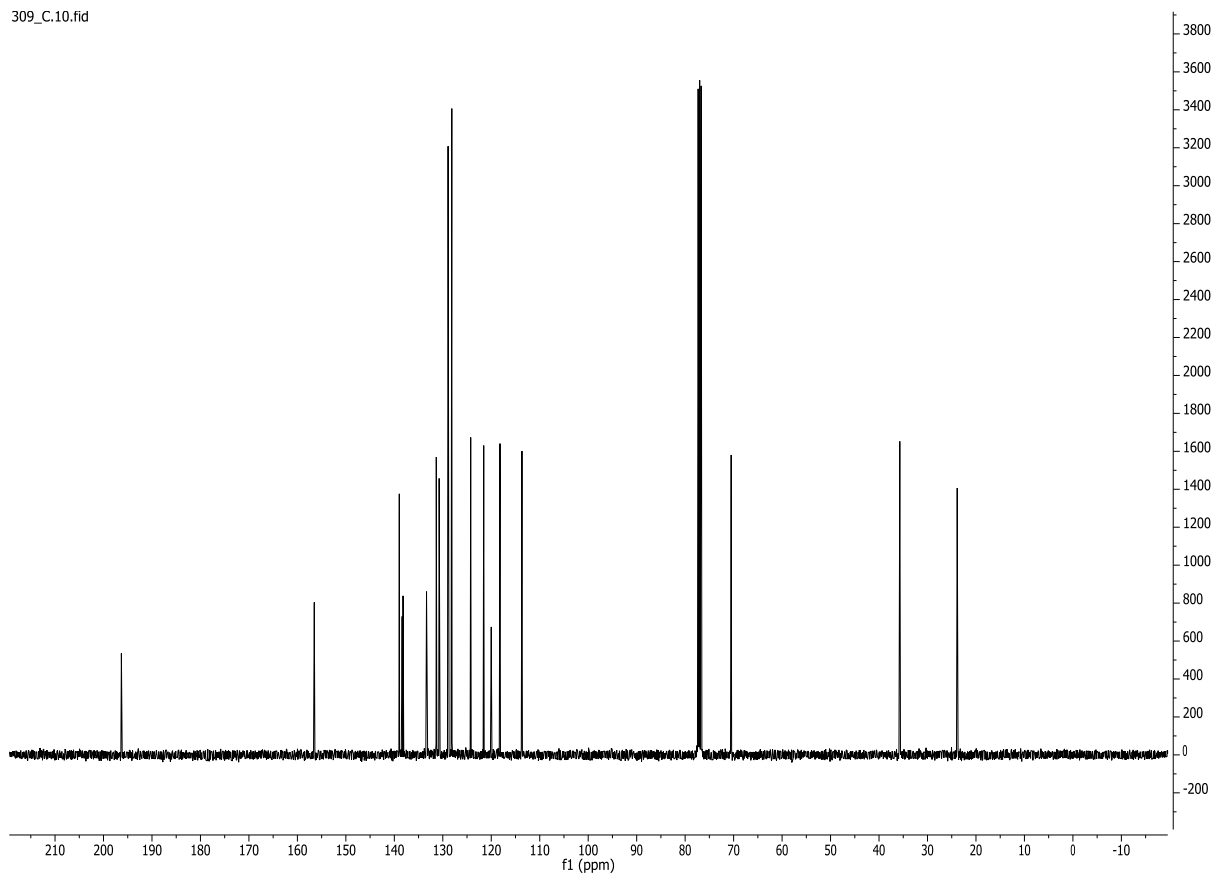

336\_co.10.fid

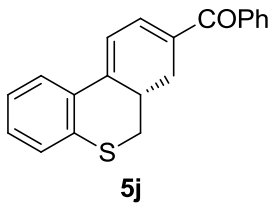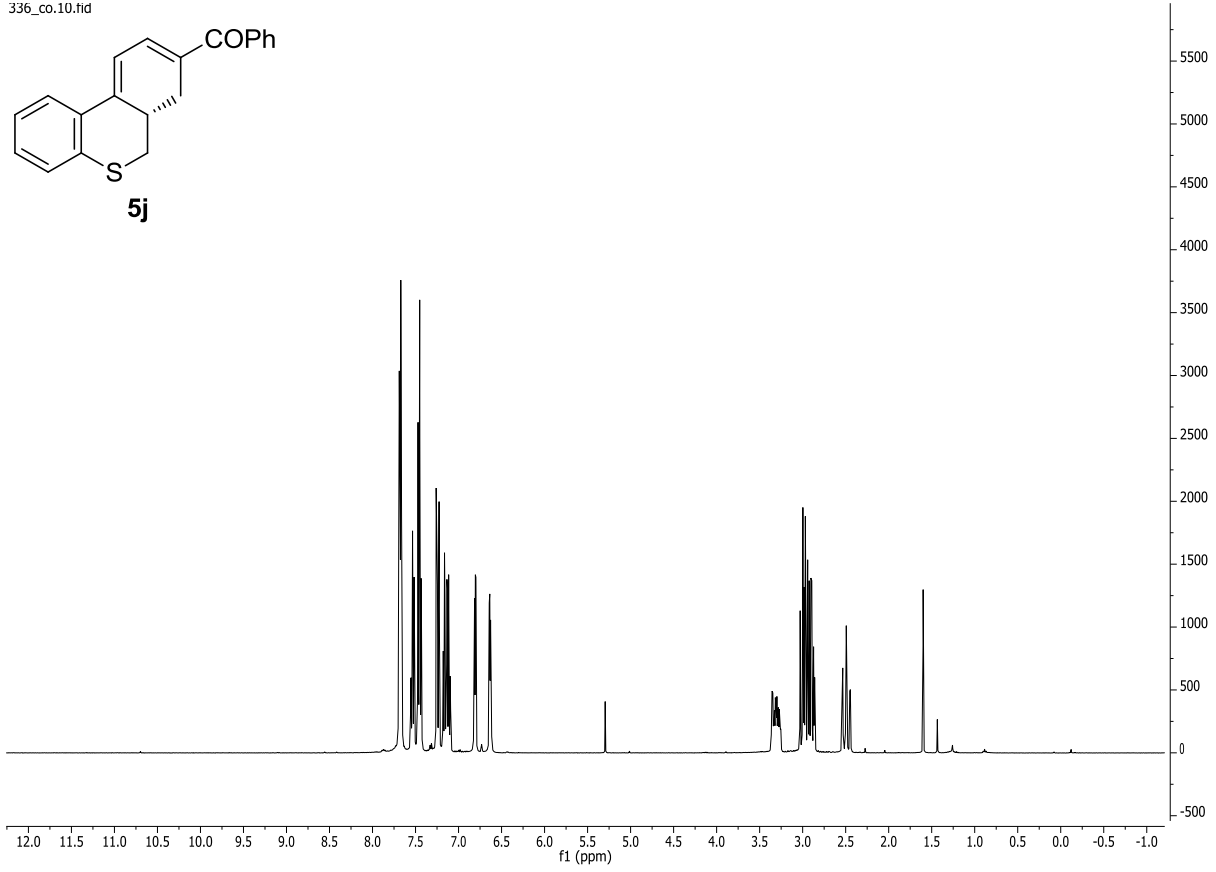

336\_C.10.fid

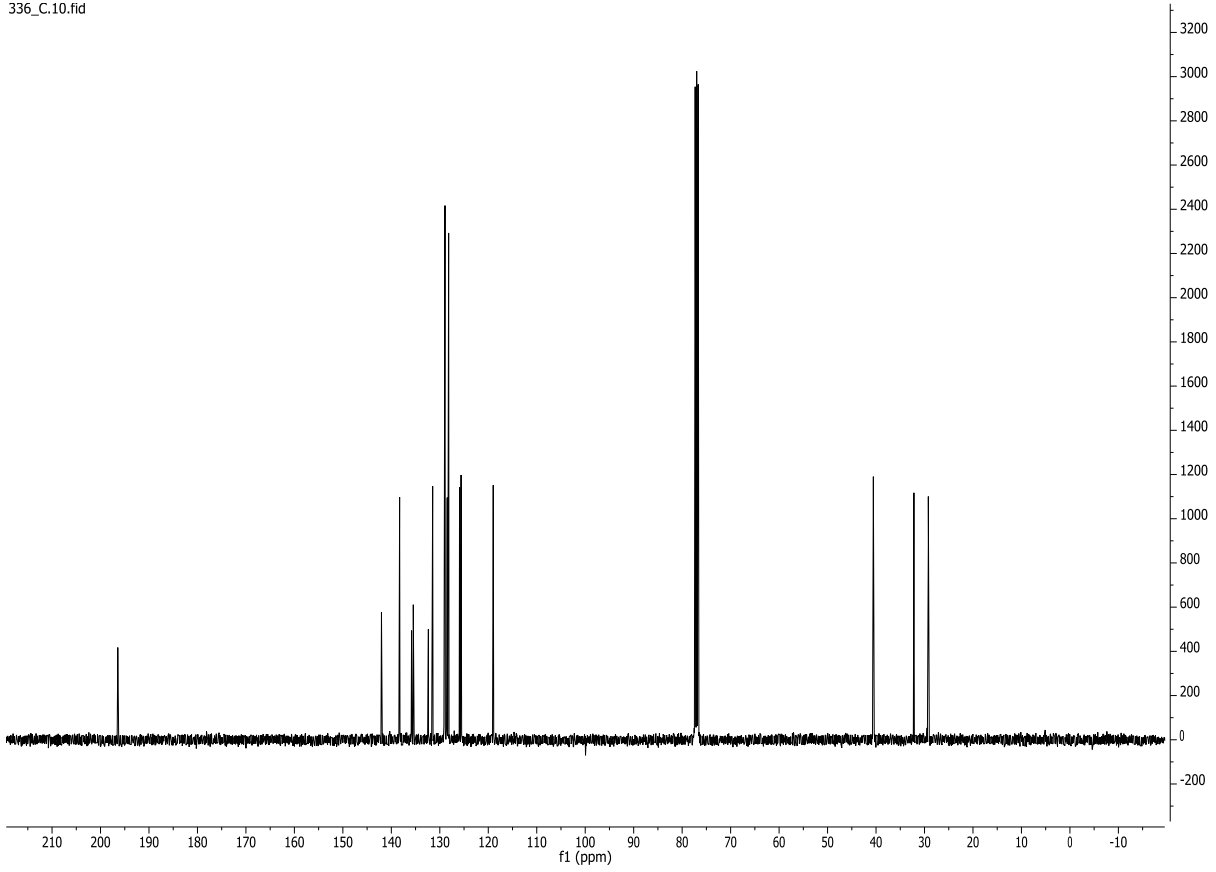

LAL28-FC.H.10.fid

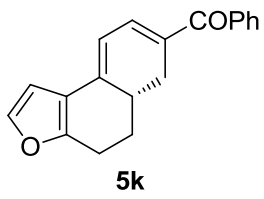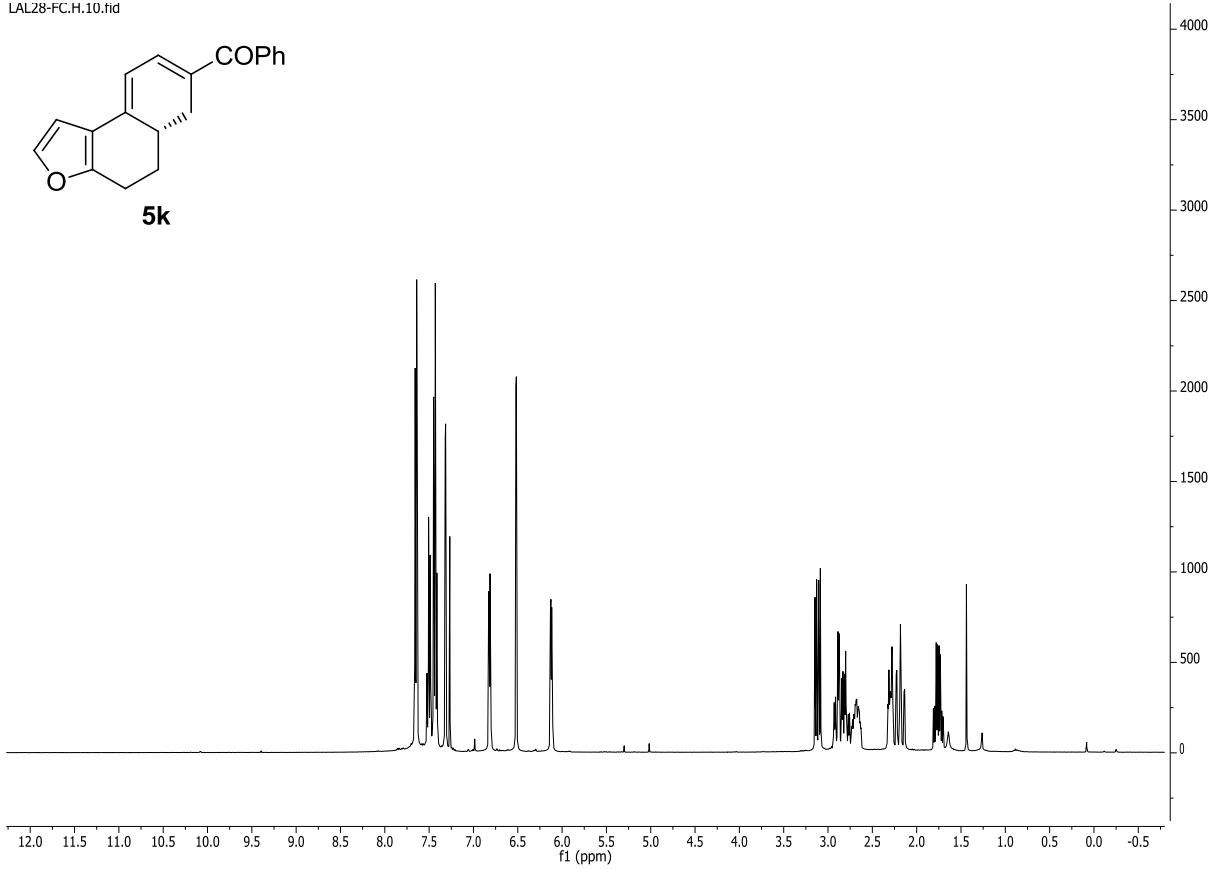

LAL28-FC.C.10.fid

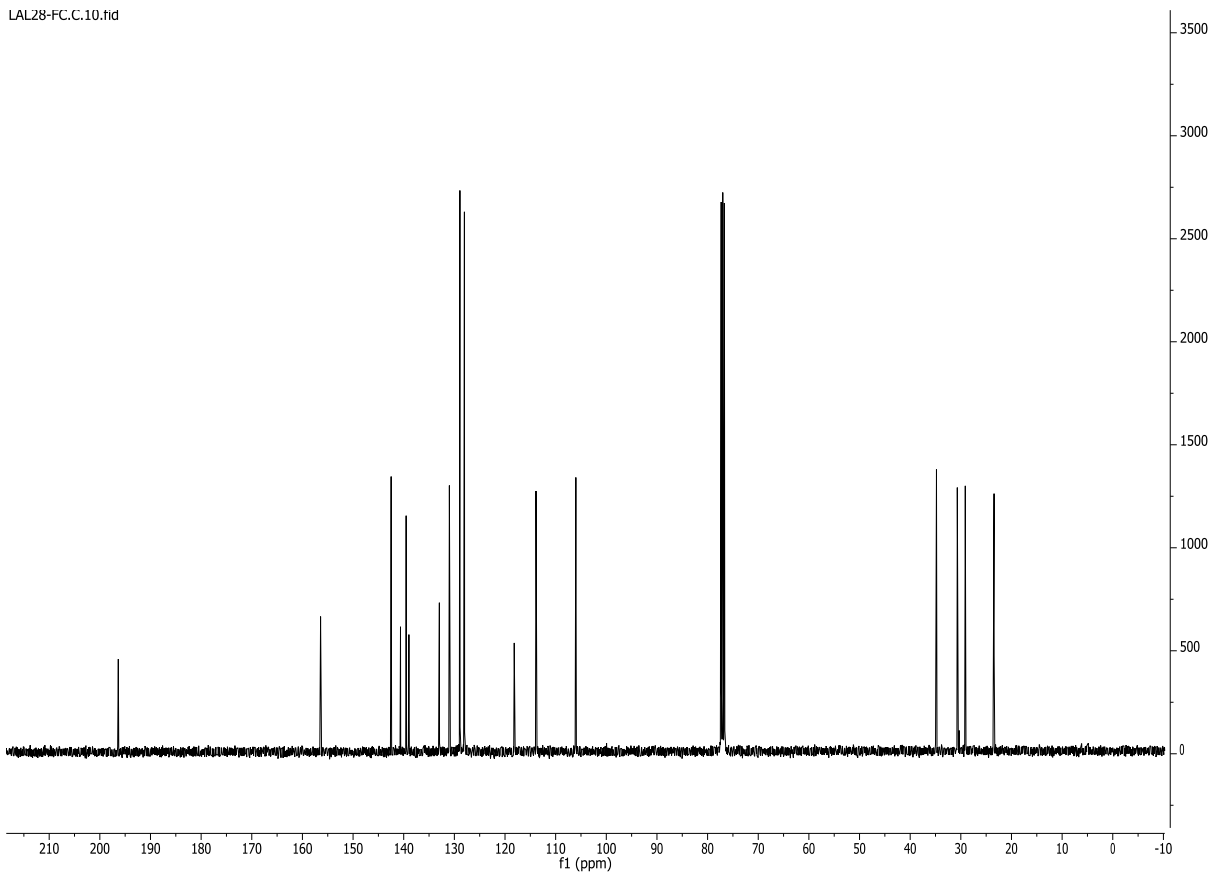



315\_H.10.fid

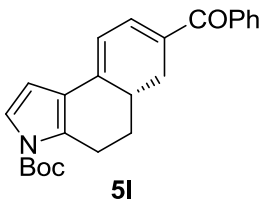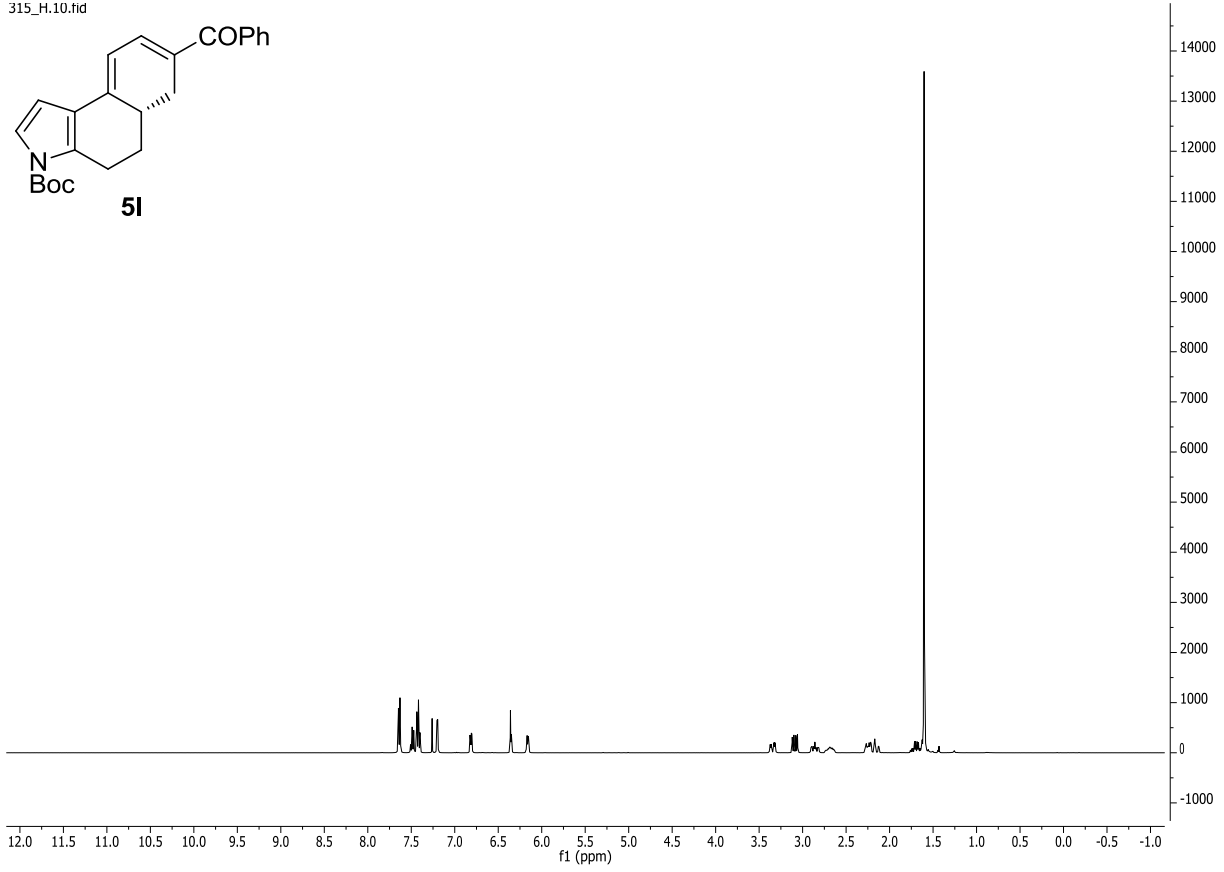

315\_C.10.fid

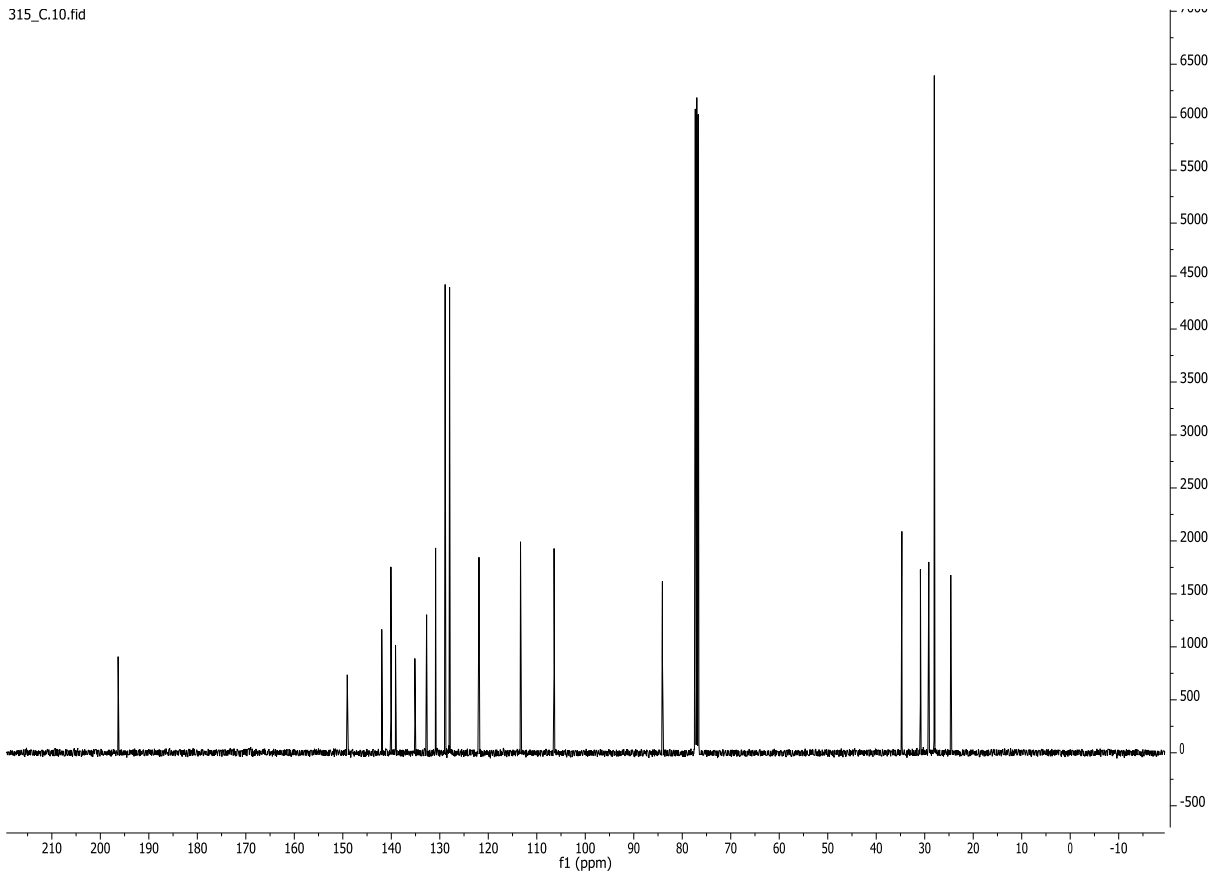



KSH-336.B.PNMR.10.fid

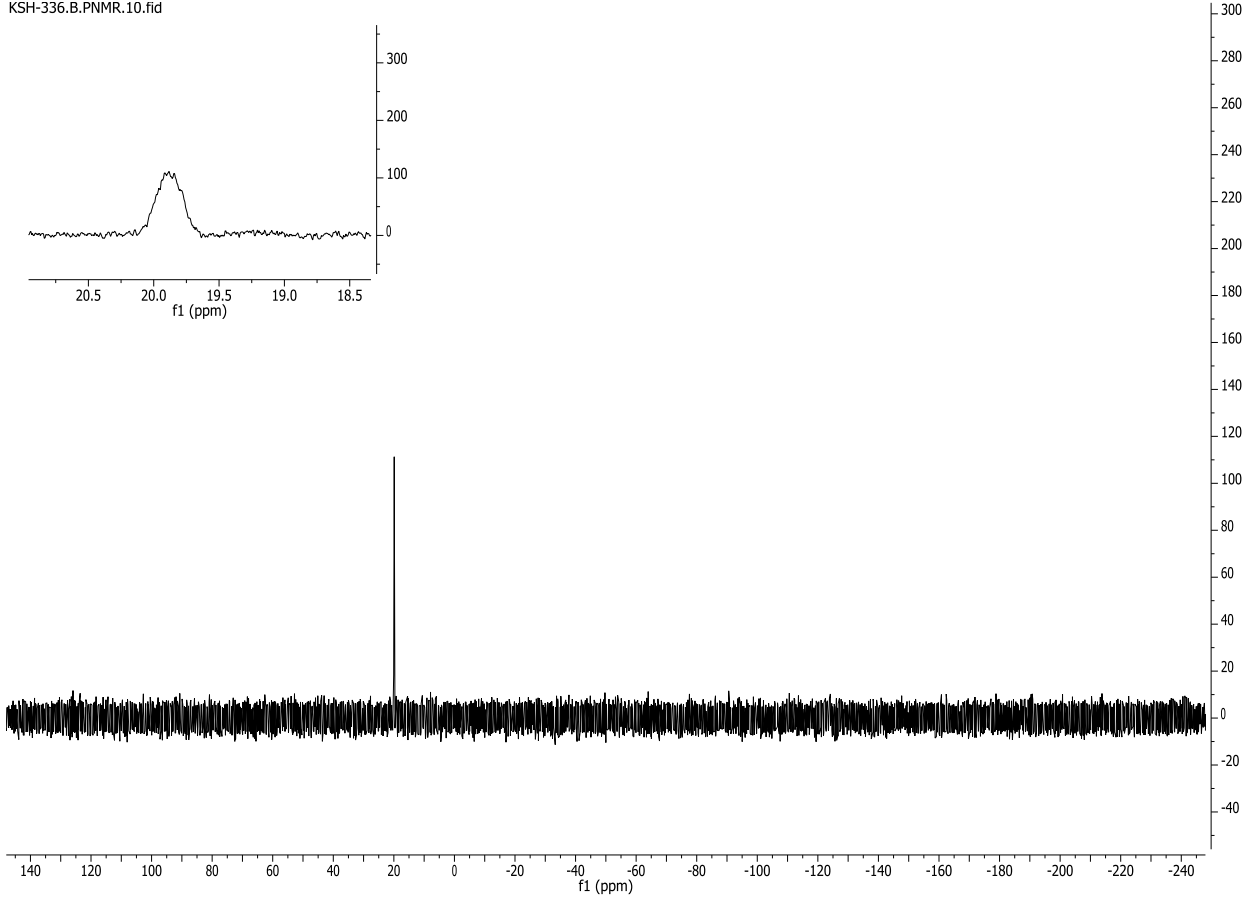

KSH-356.B.HNMR.10.fid

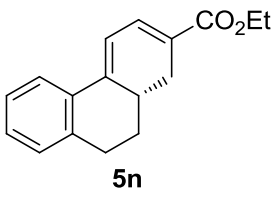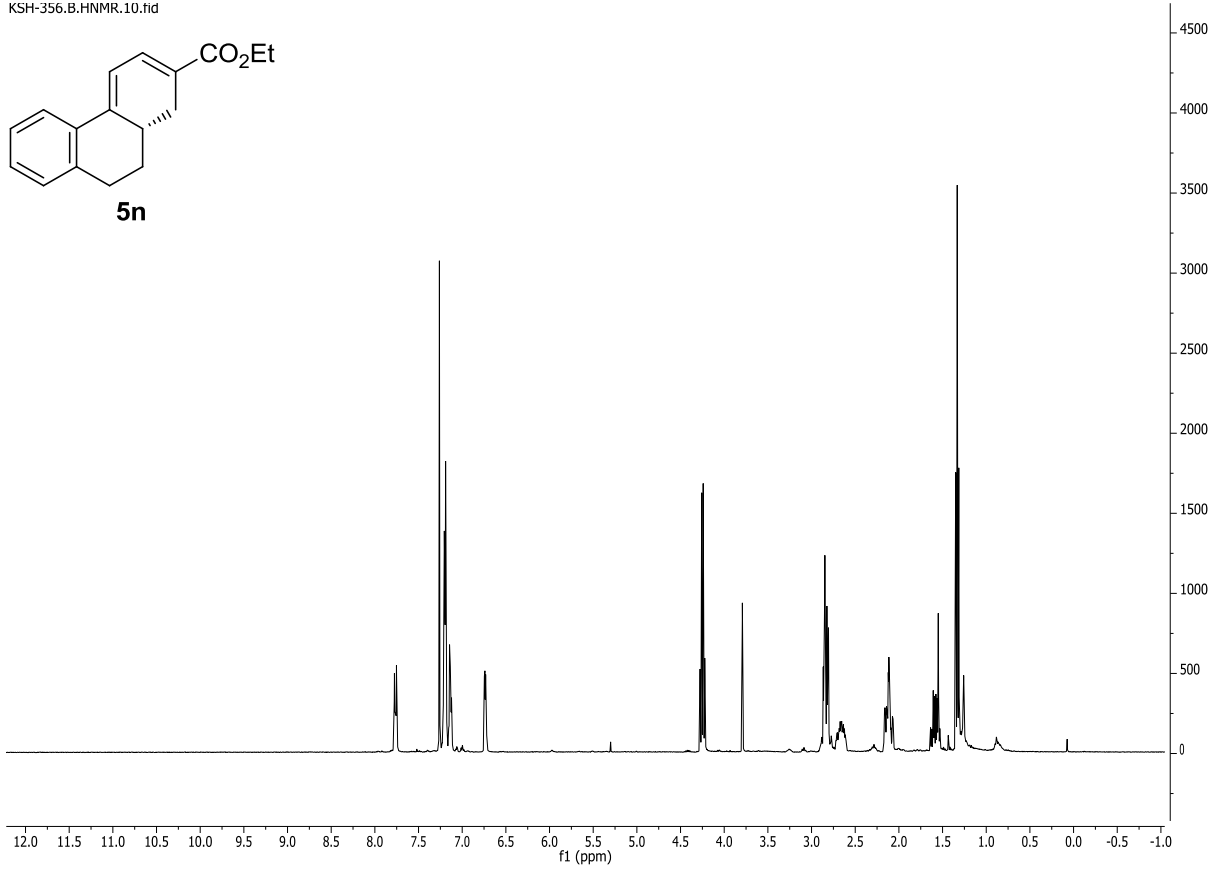

KSH-356.C.HNMR.10.fid

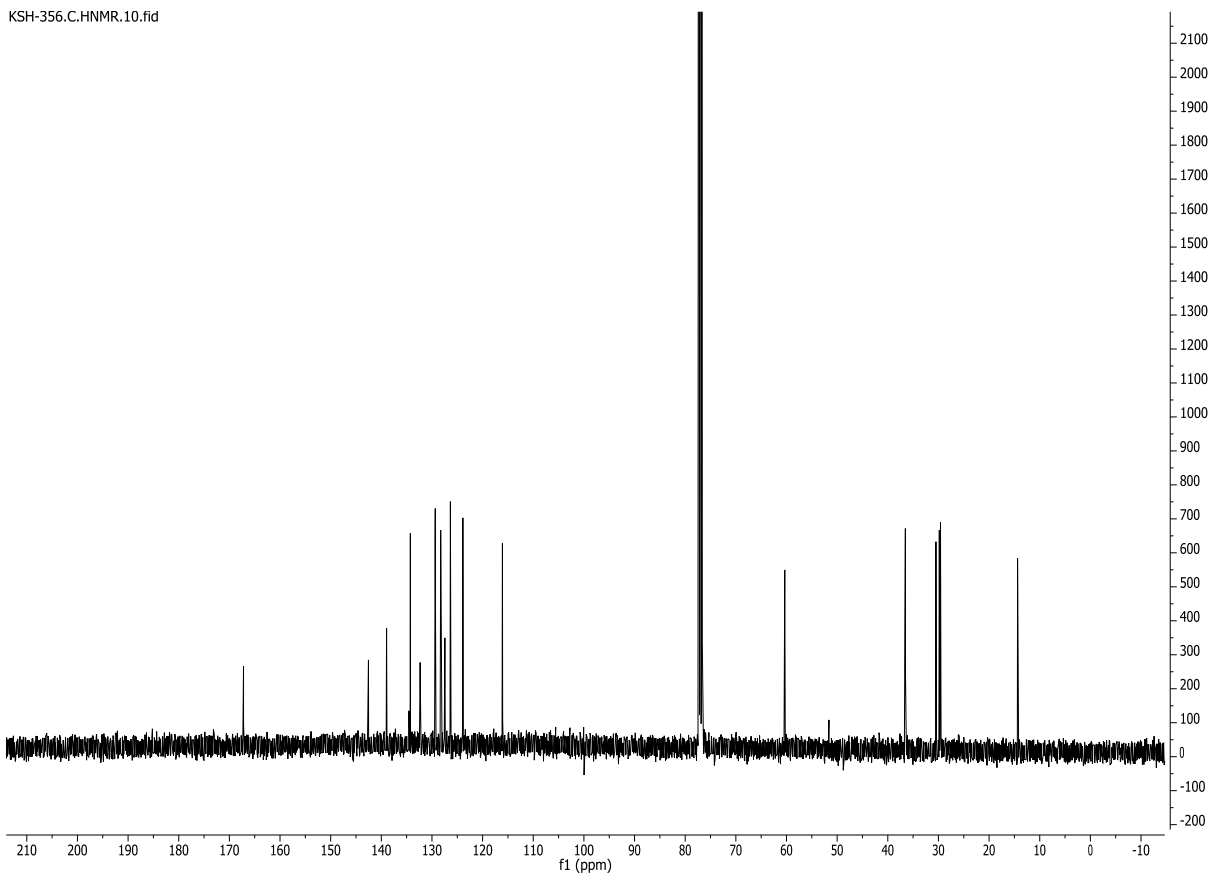

KSH-392.A.HNMR.20.fid

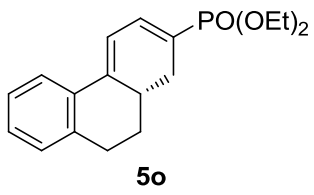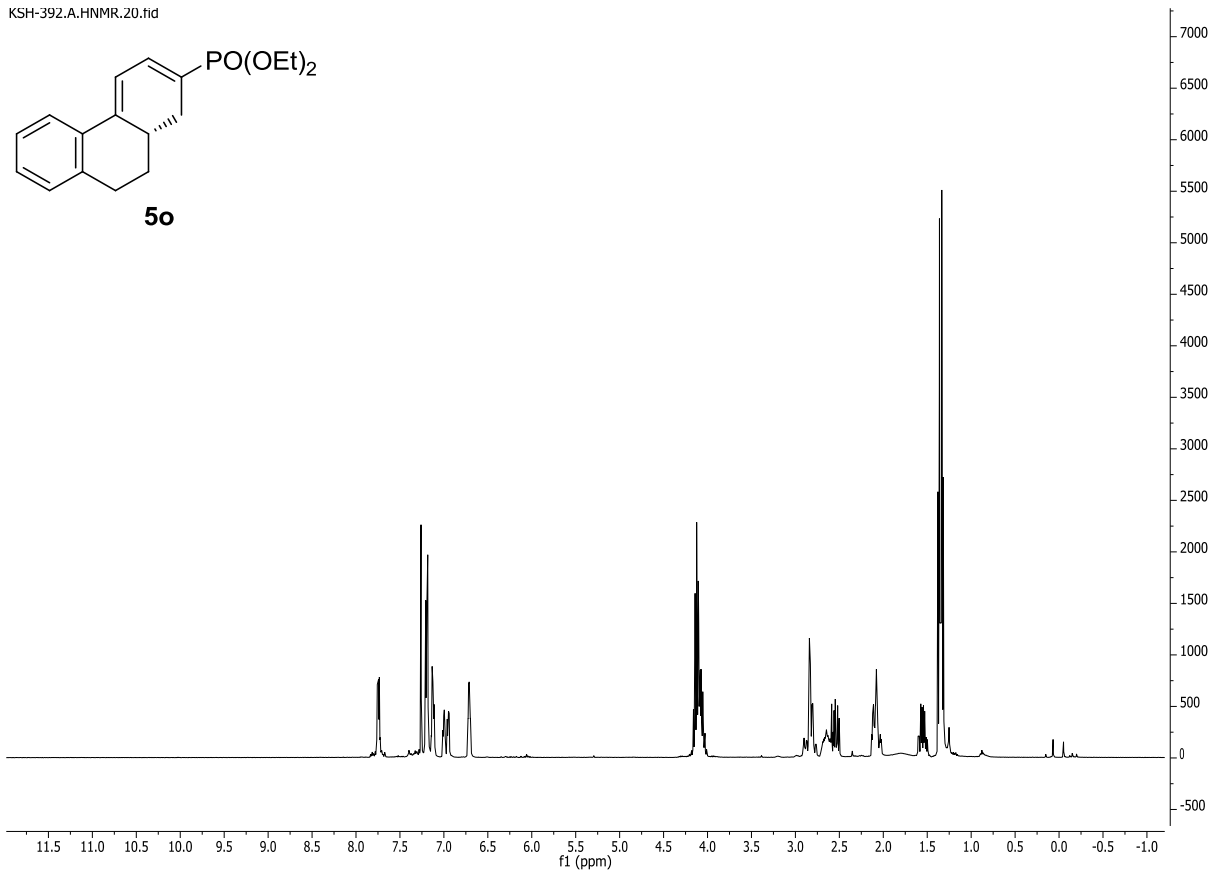

KSH-392.A.CNMR.20.fid

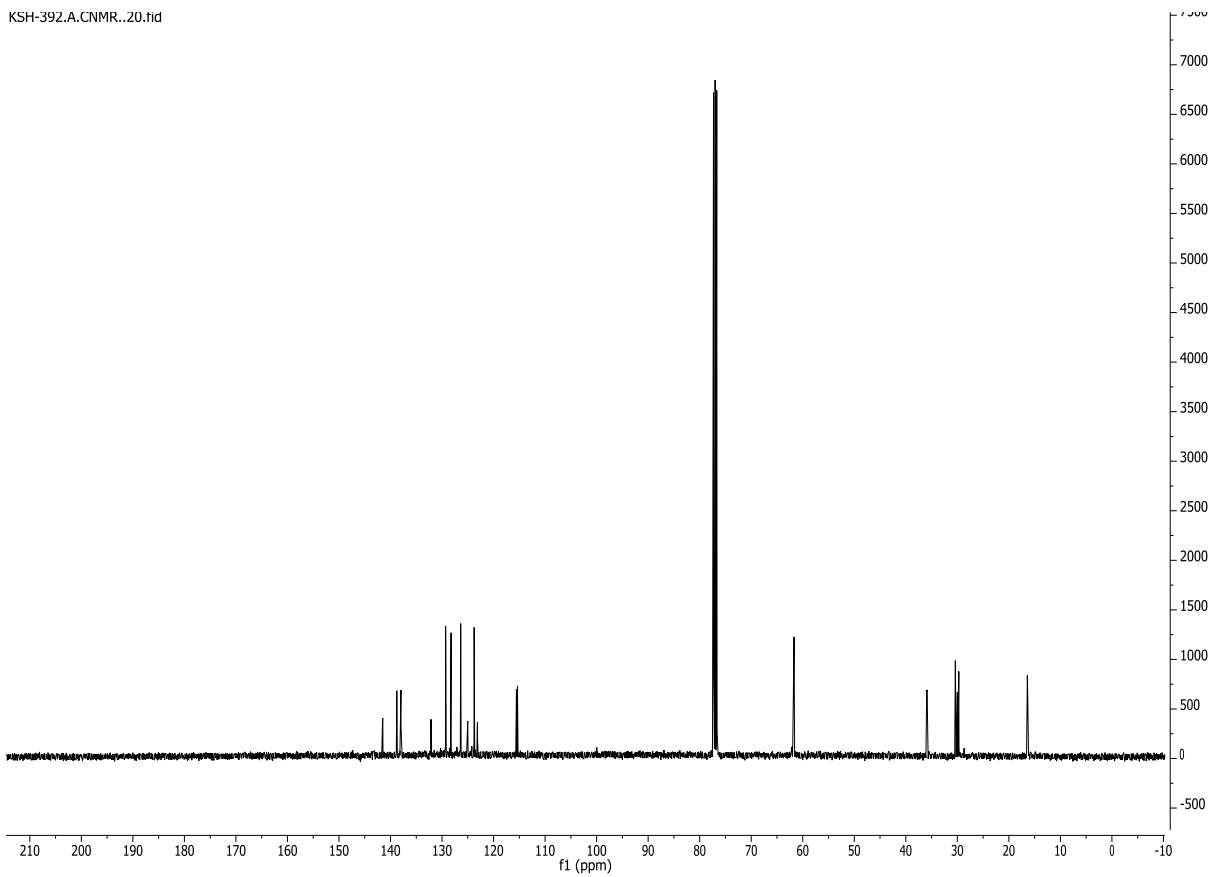

KSH-392.A.PNMR..20.fid

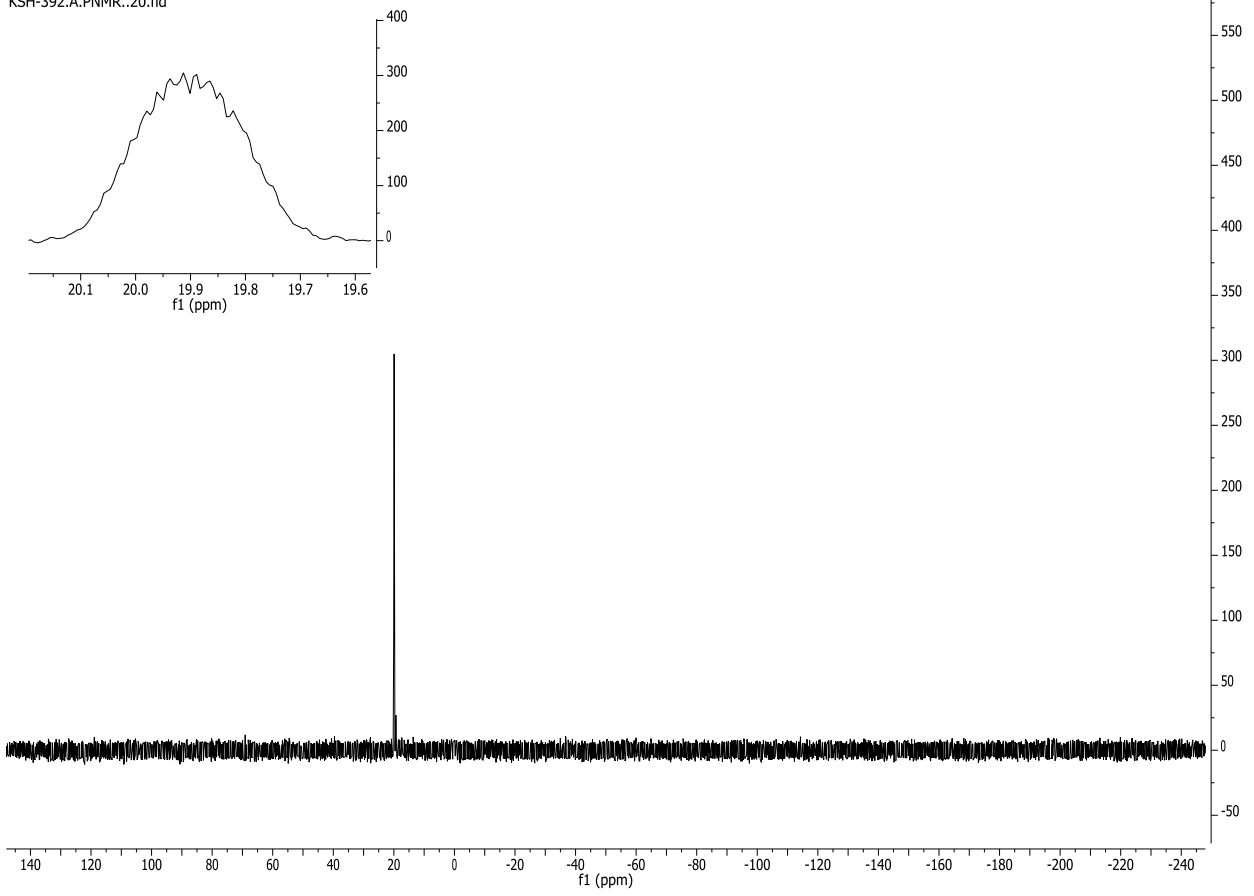

335\_co.10.fid

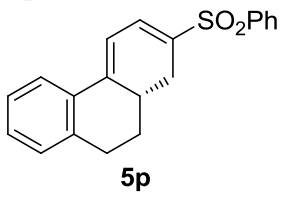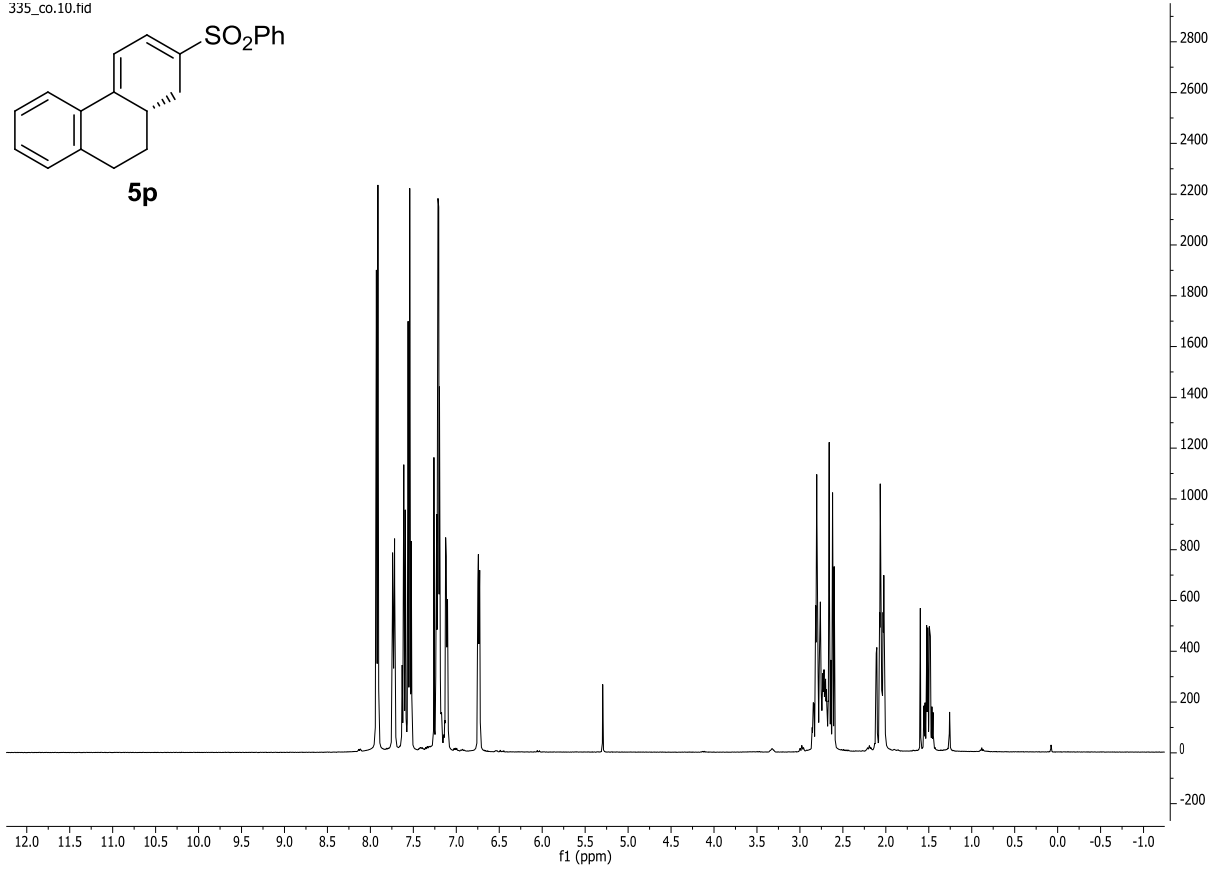

335\_C.10.fid

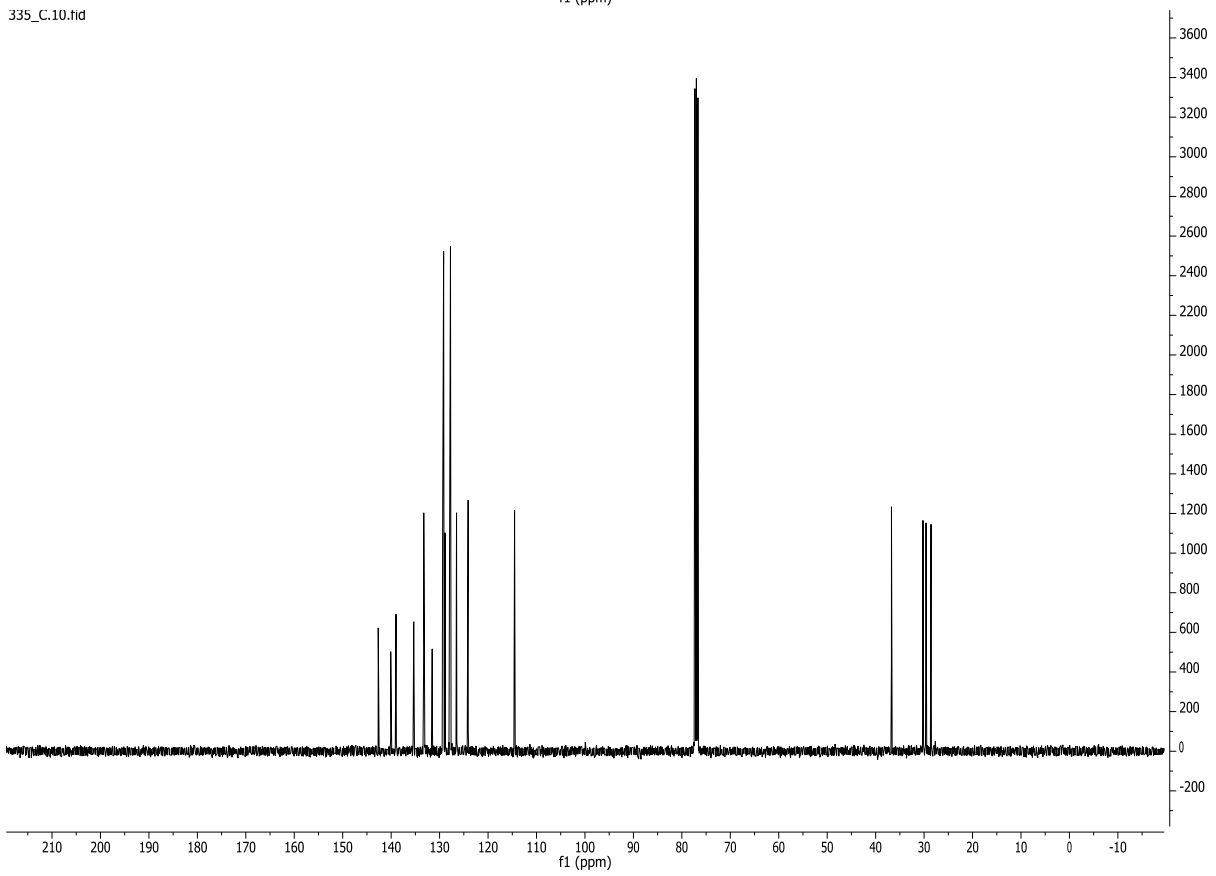

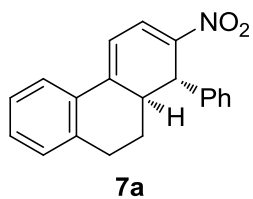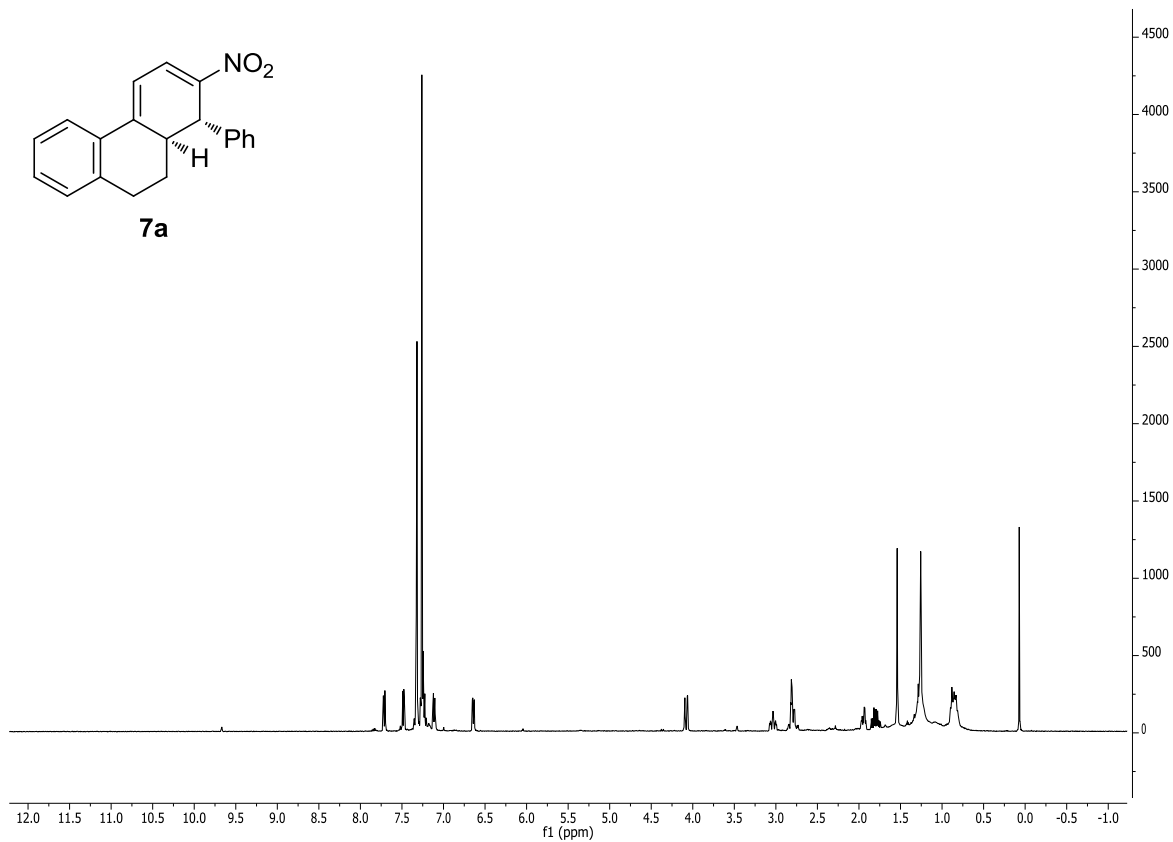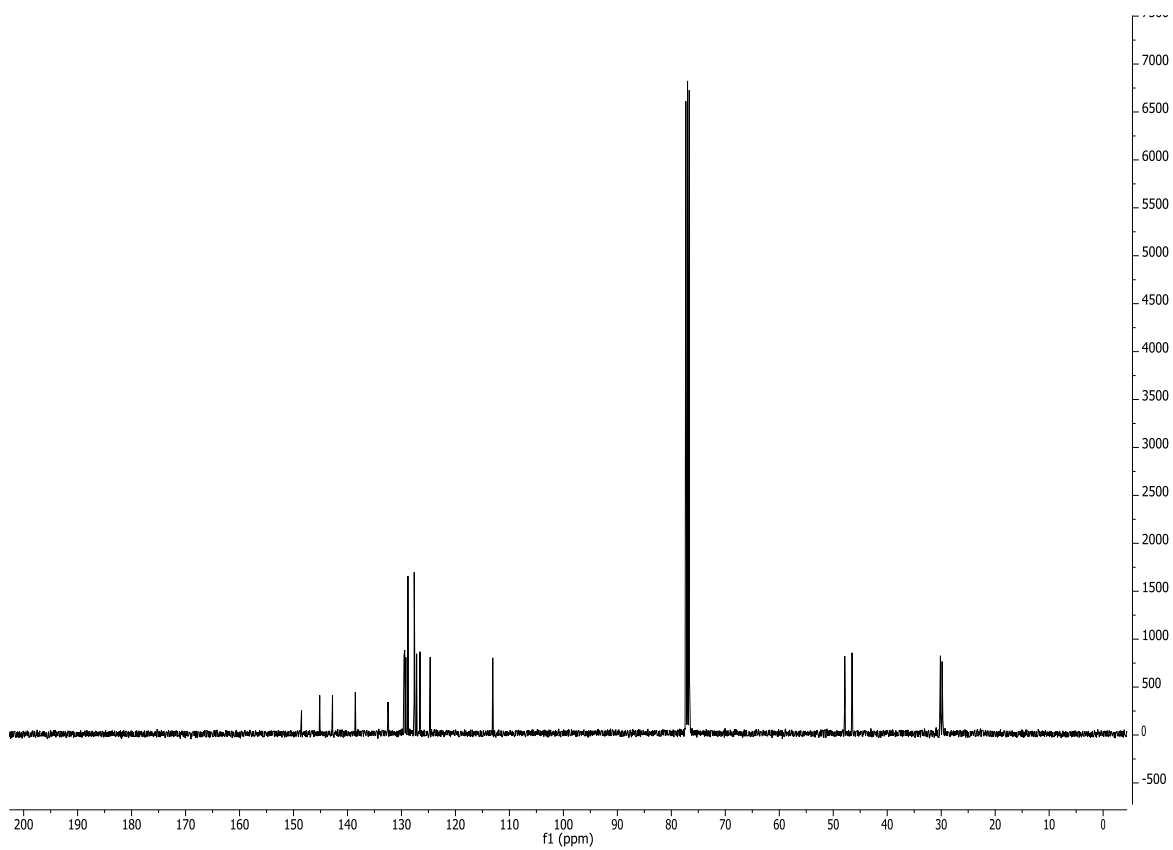



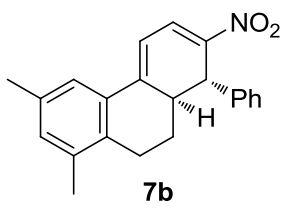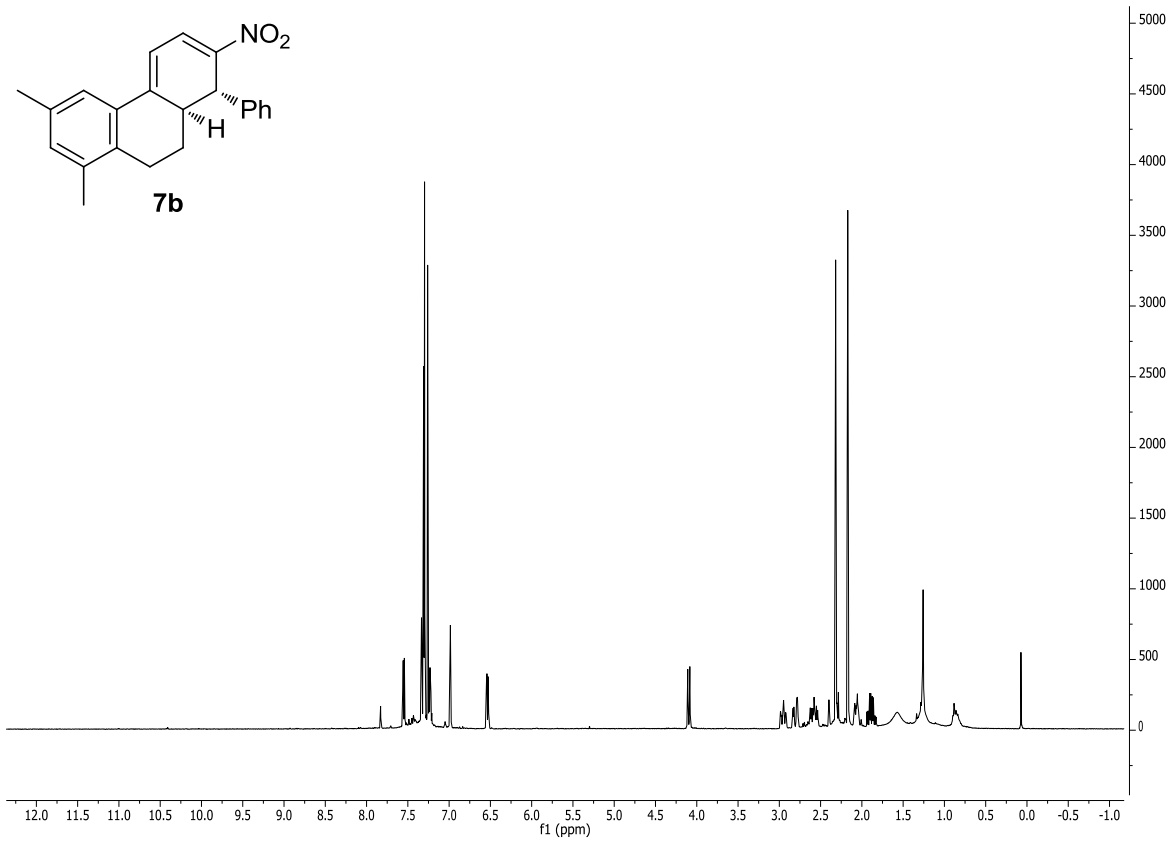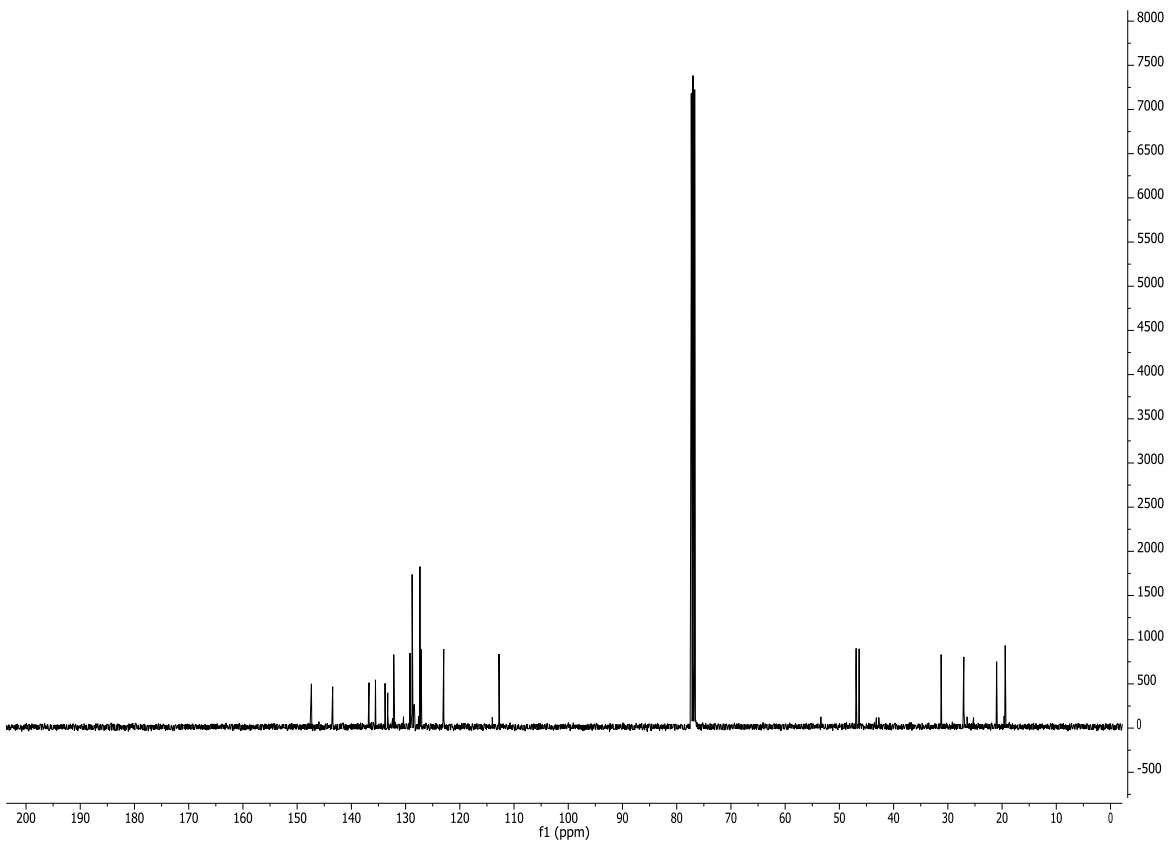



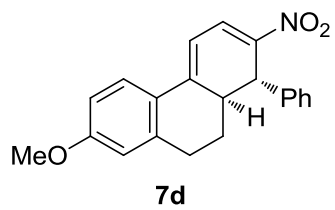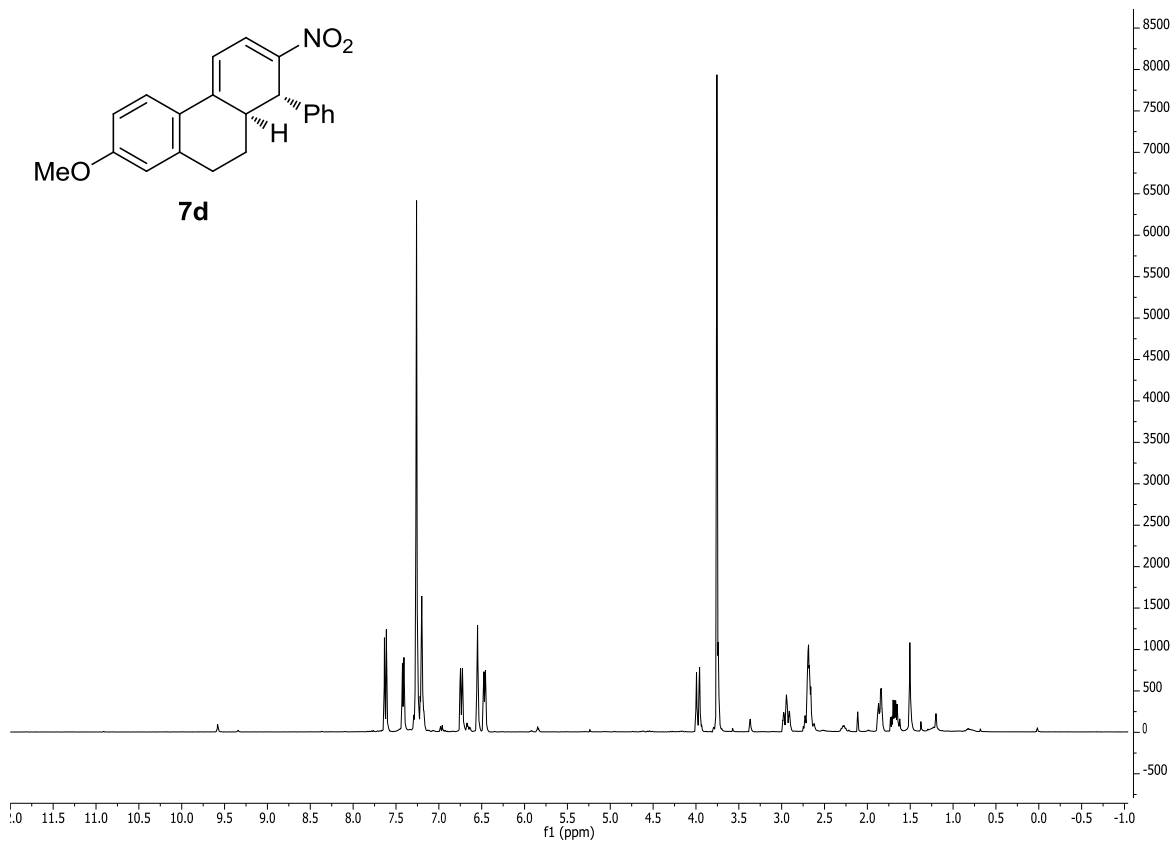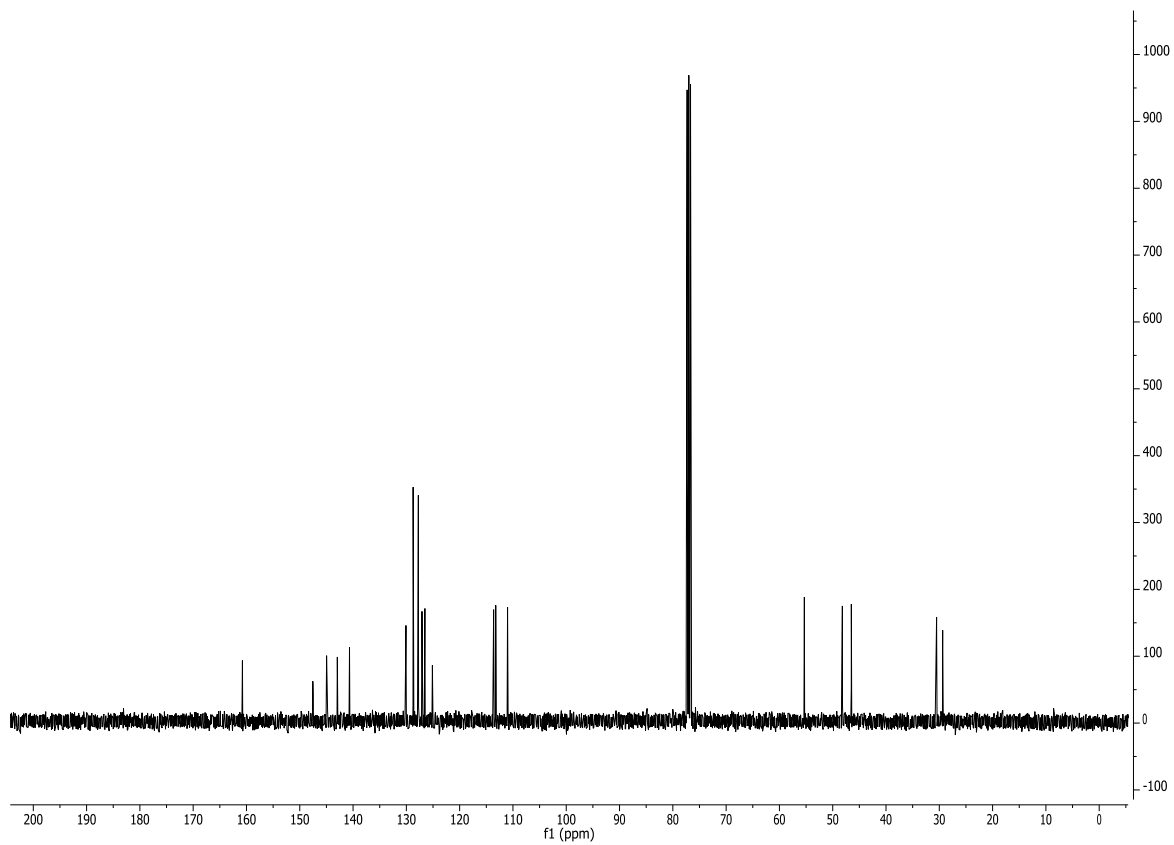

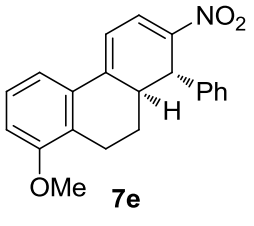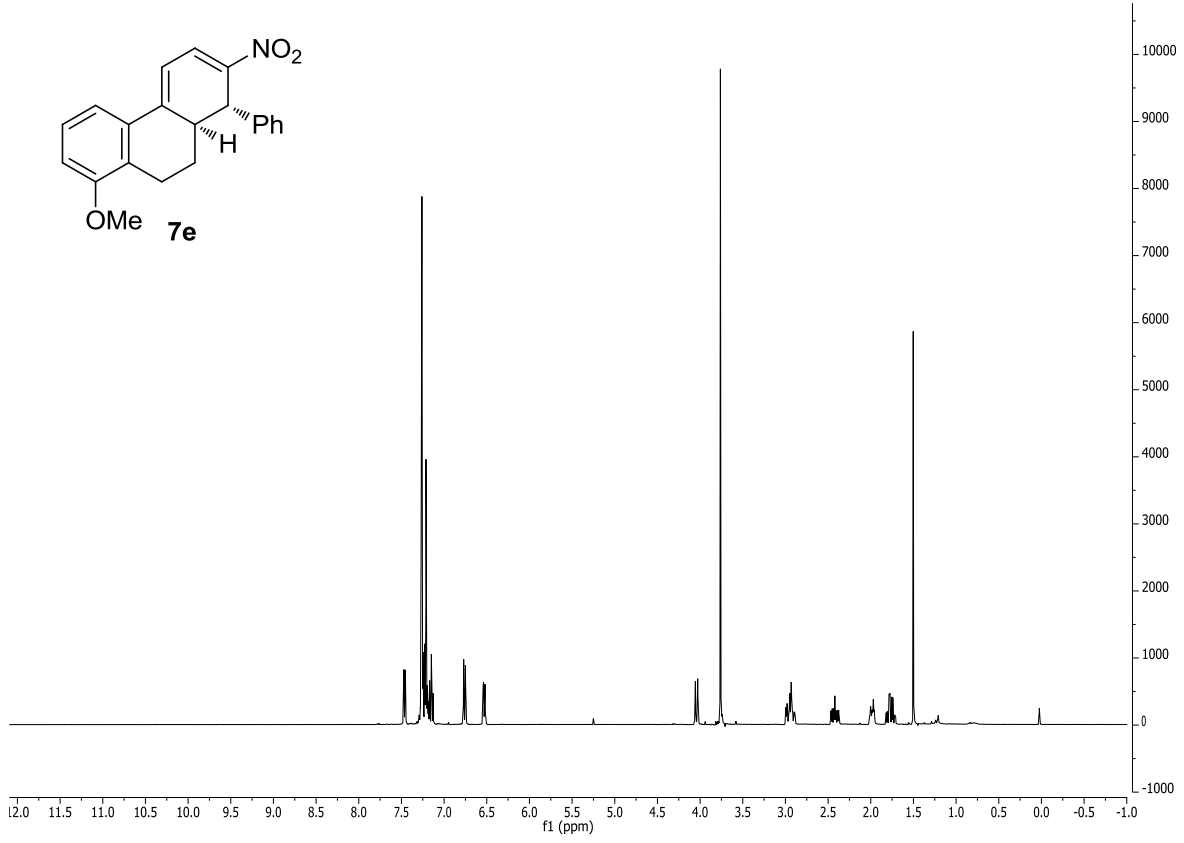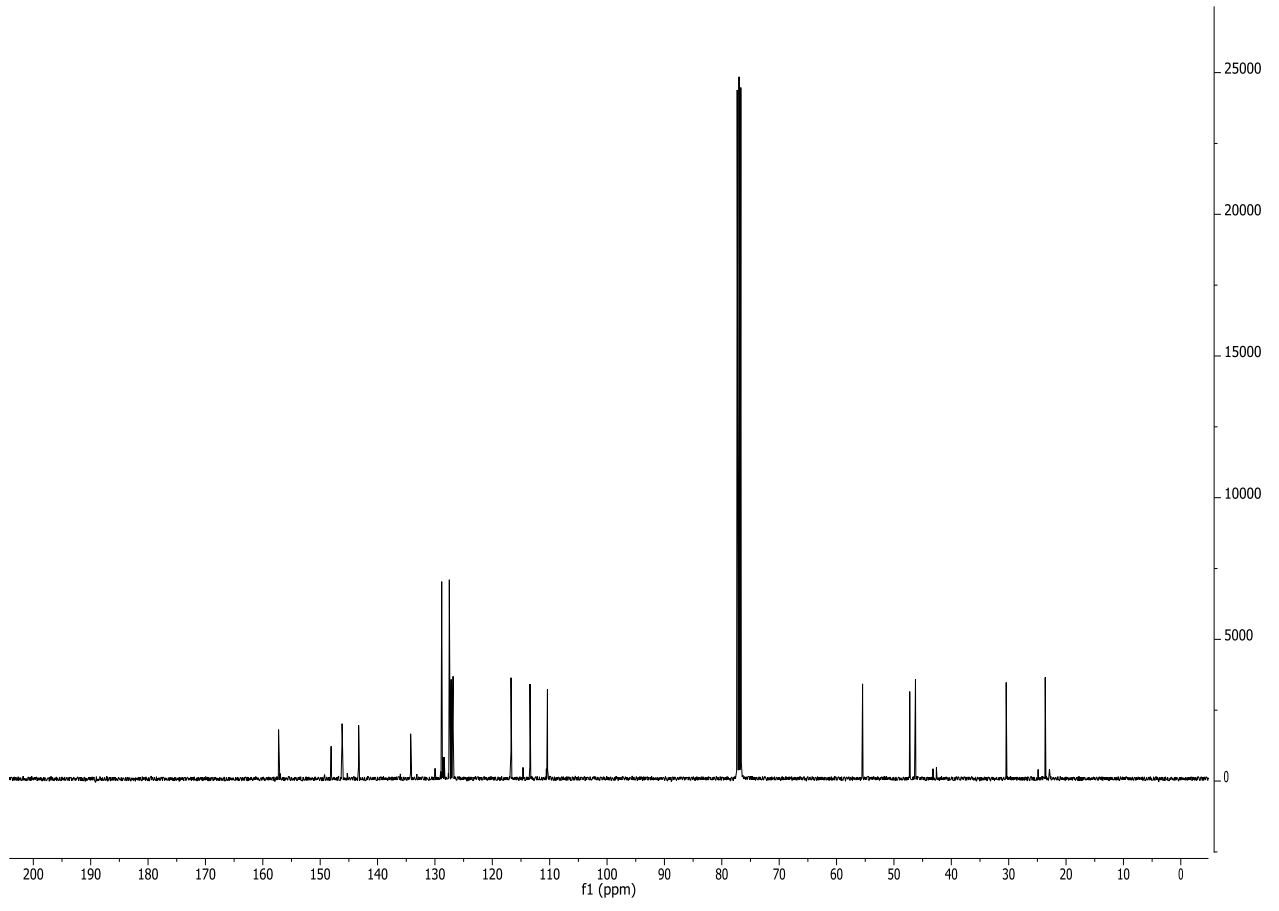

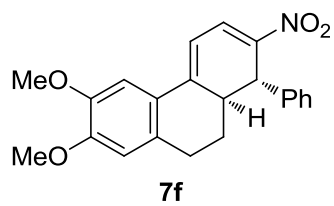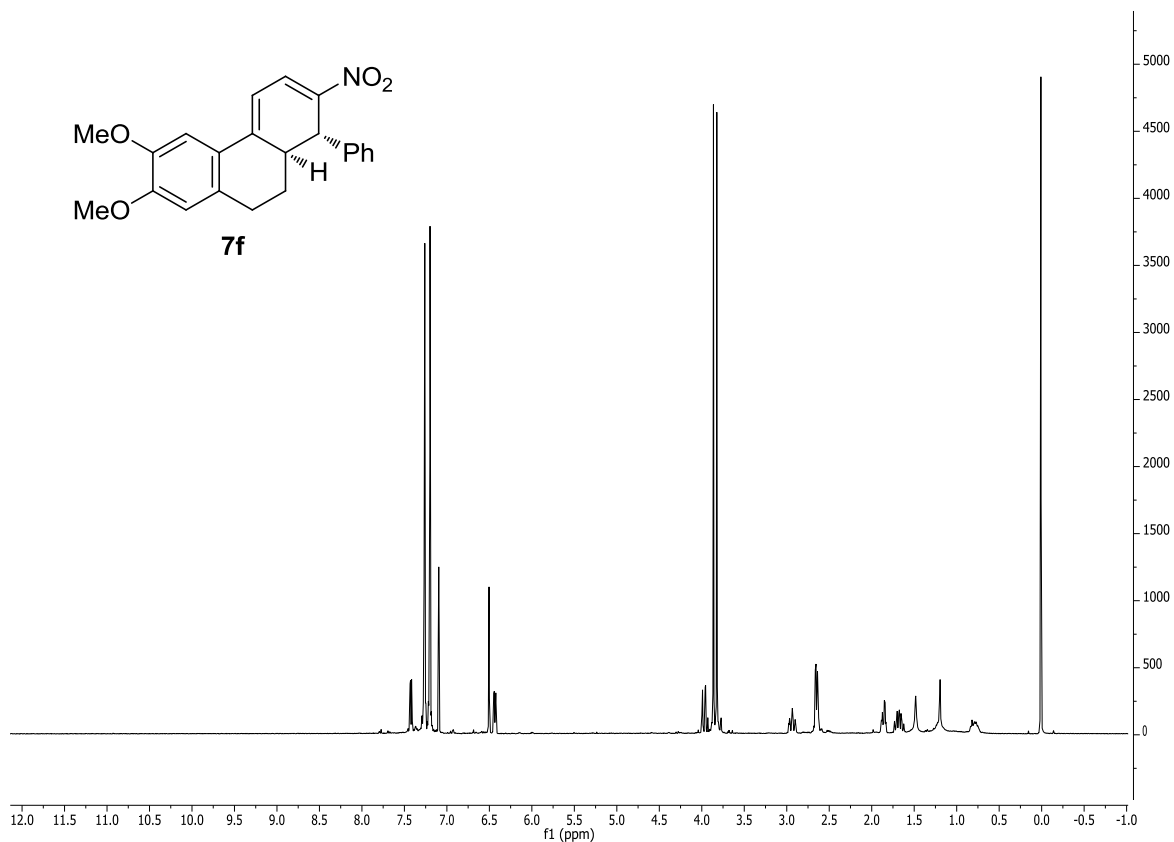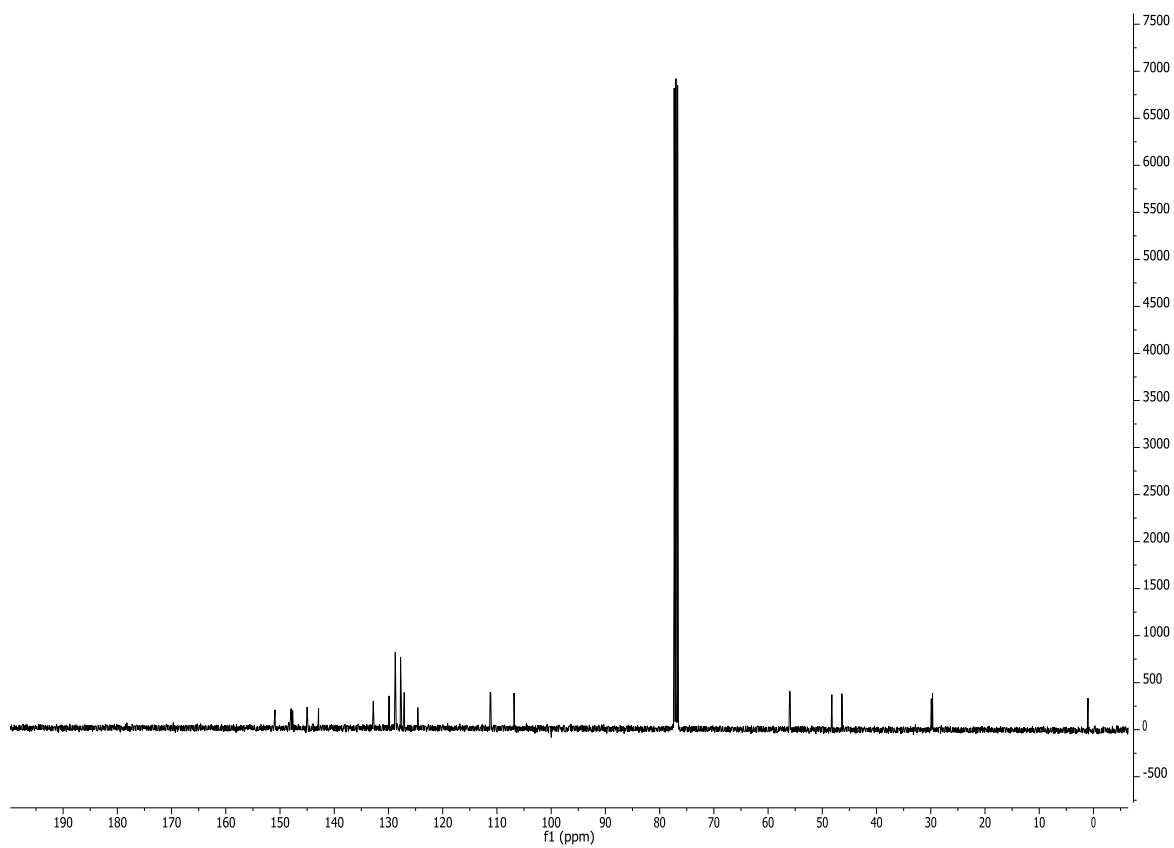

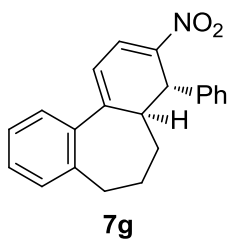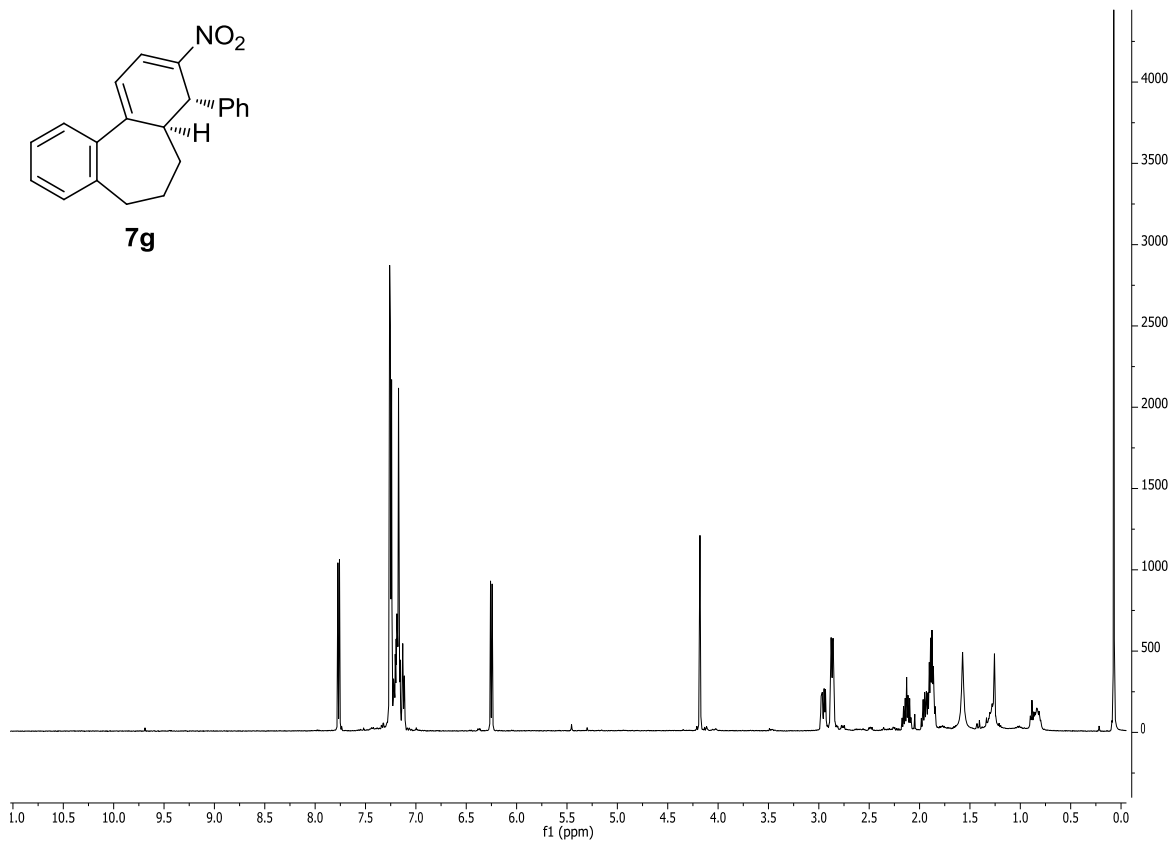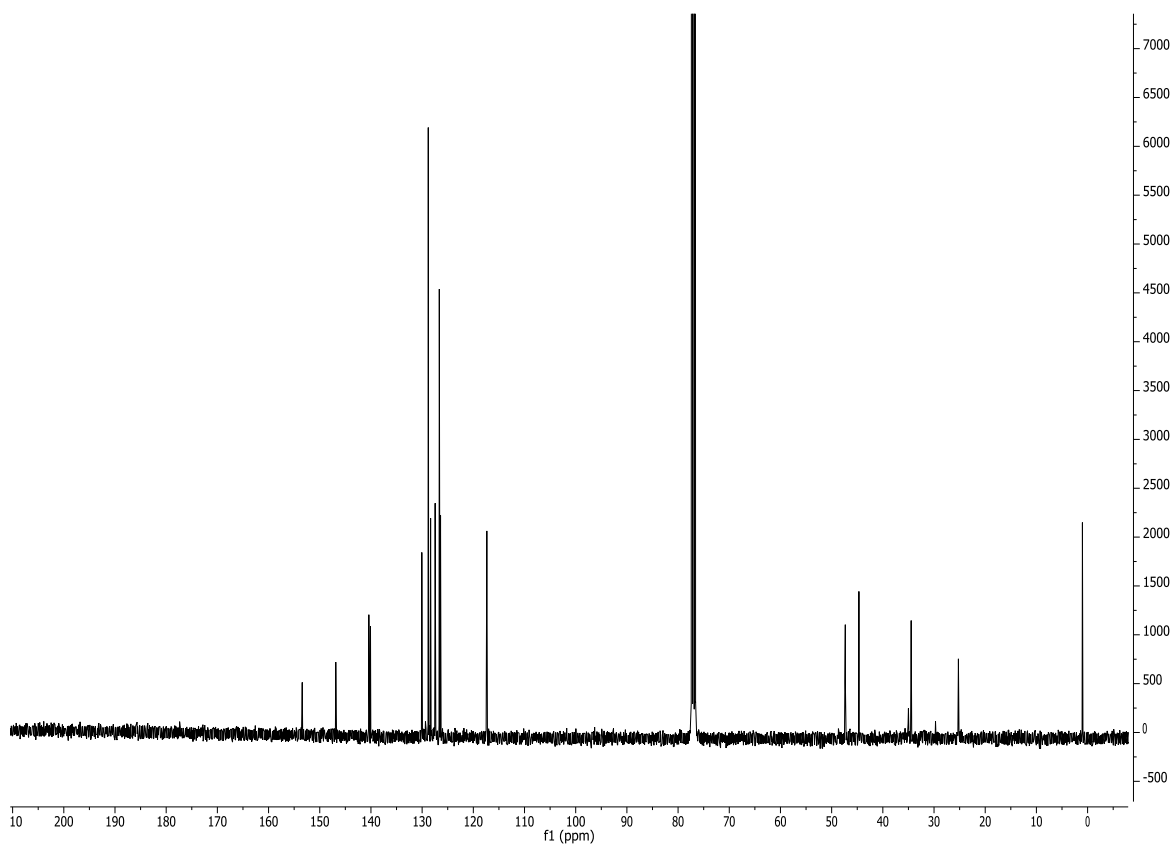

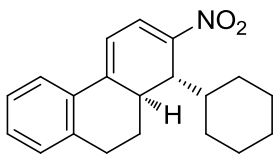

7h

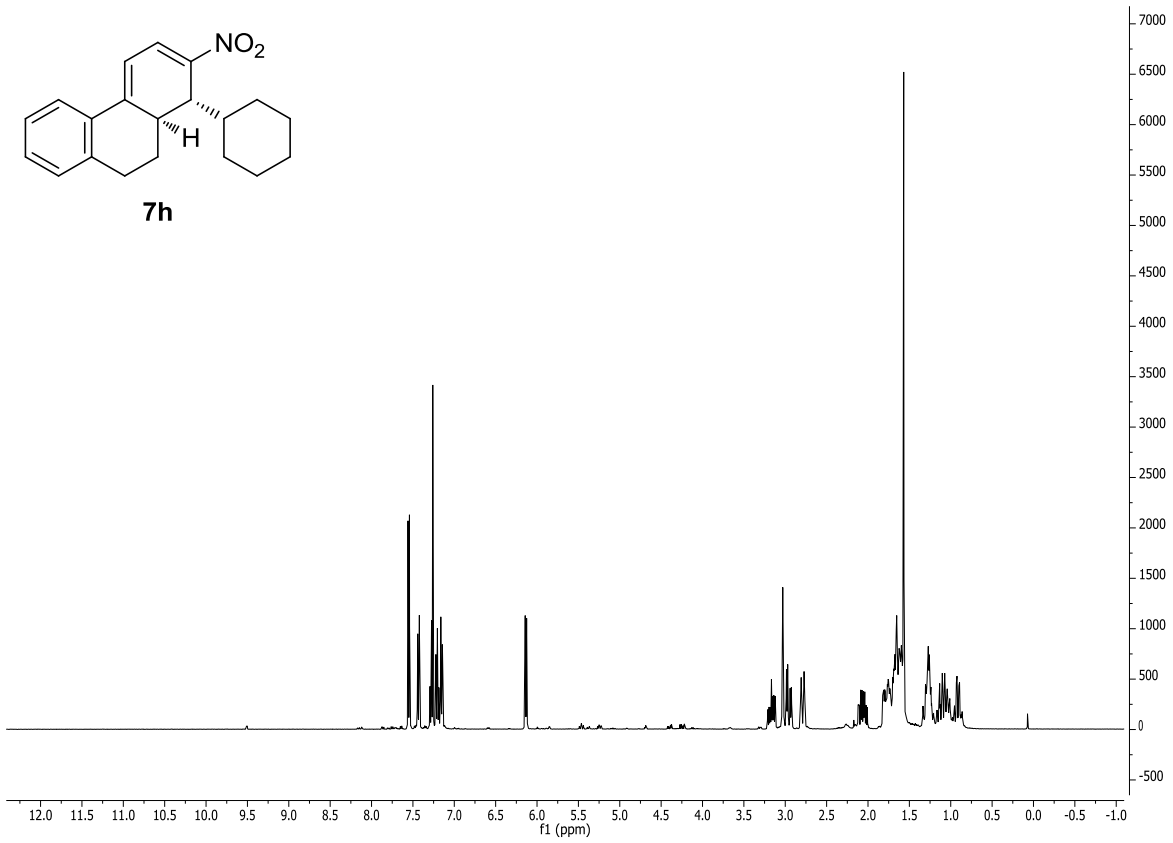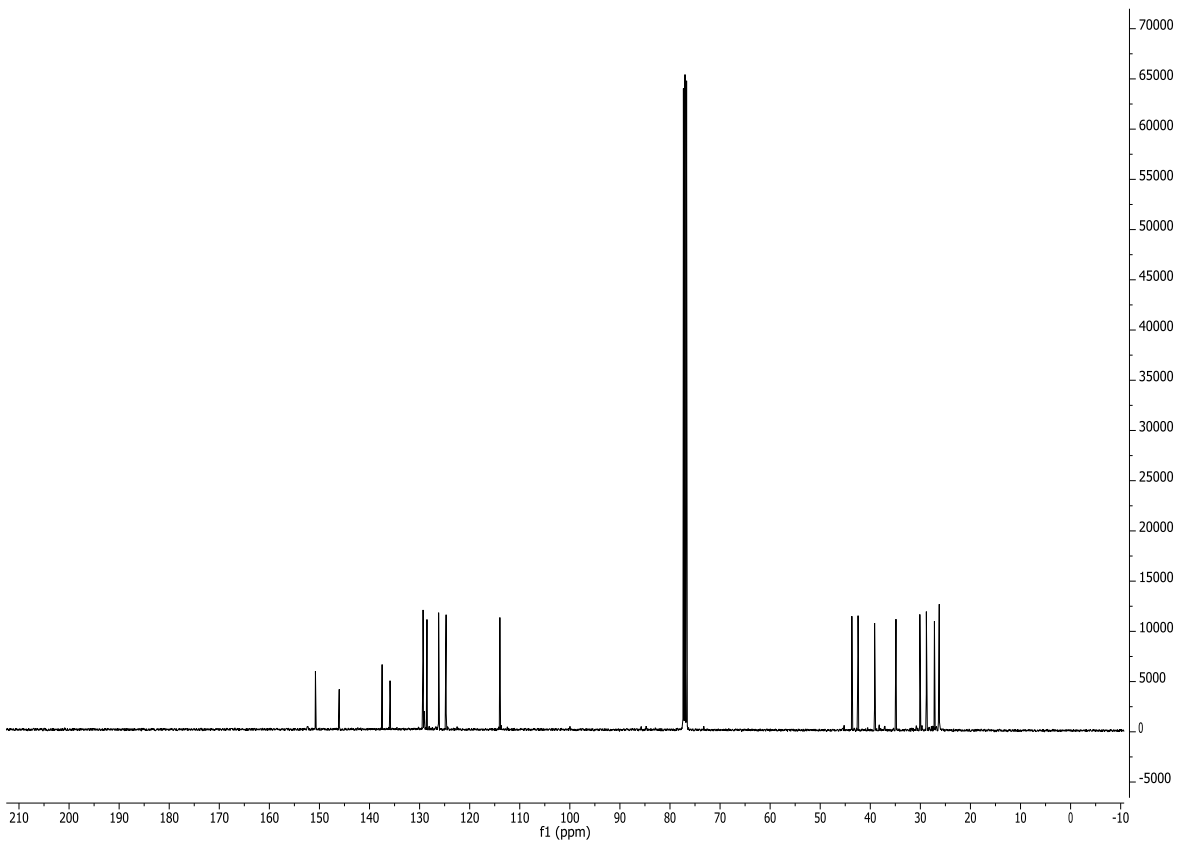

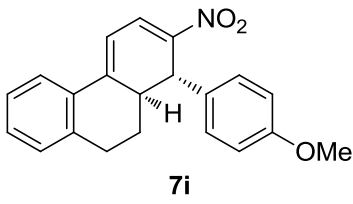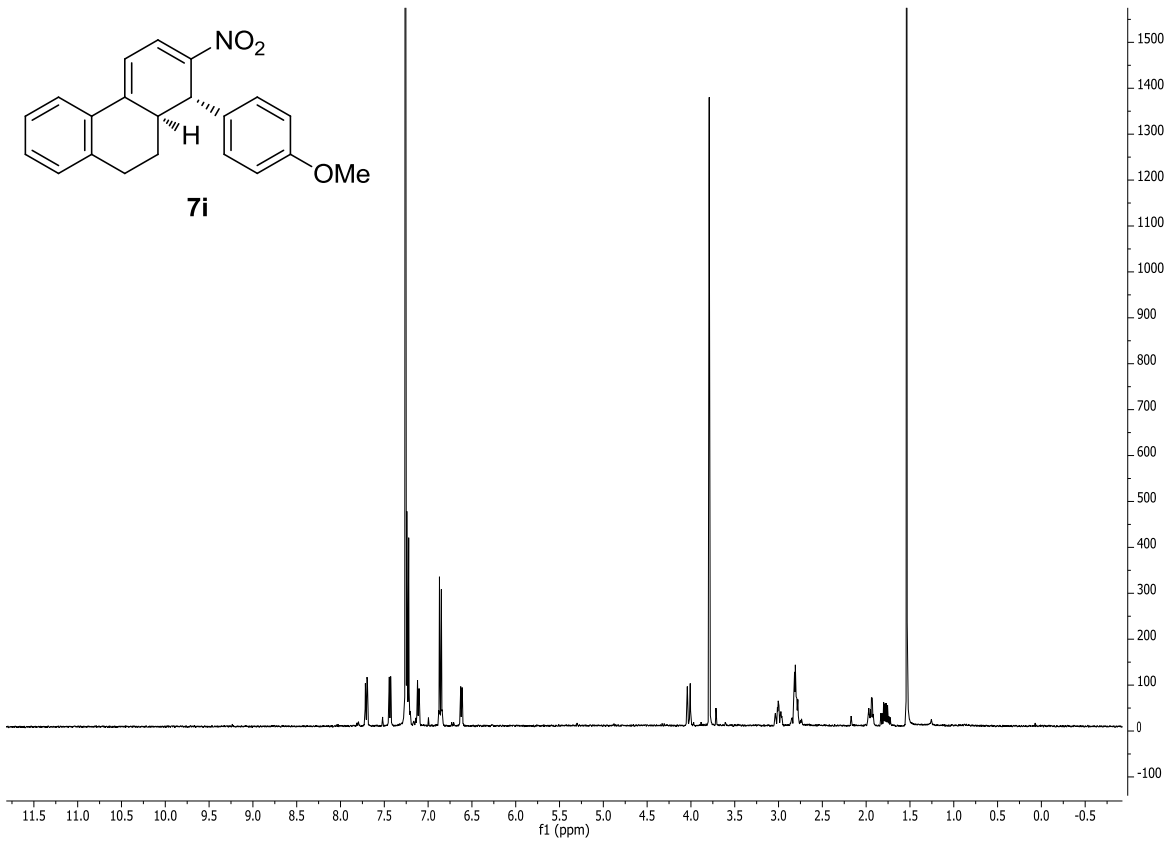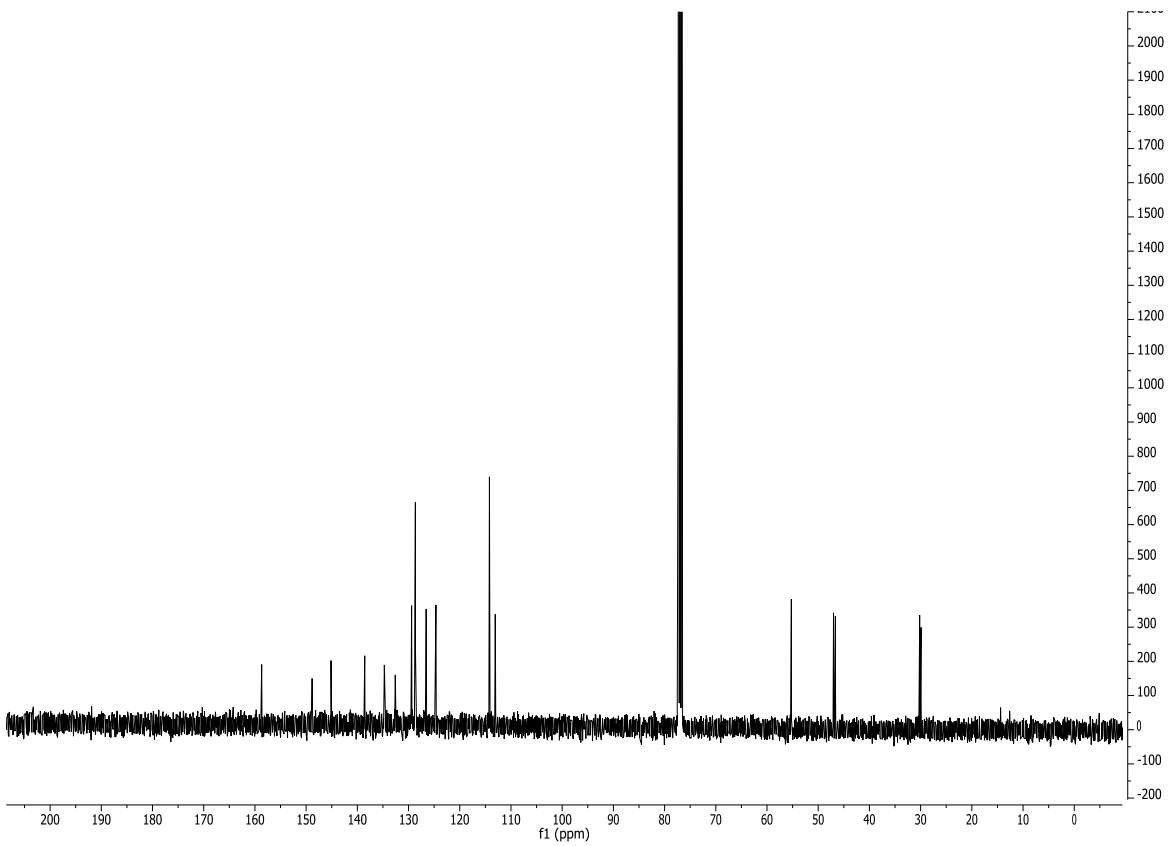



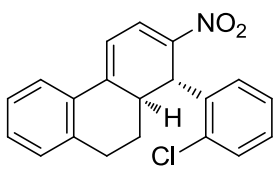

7j

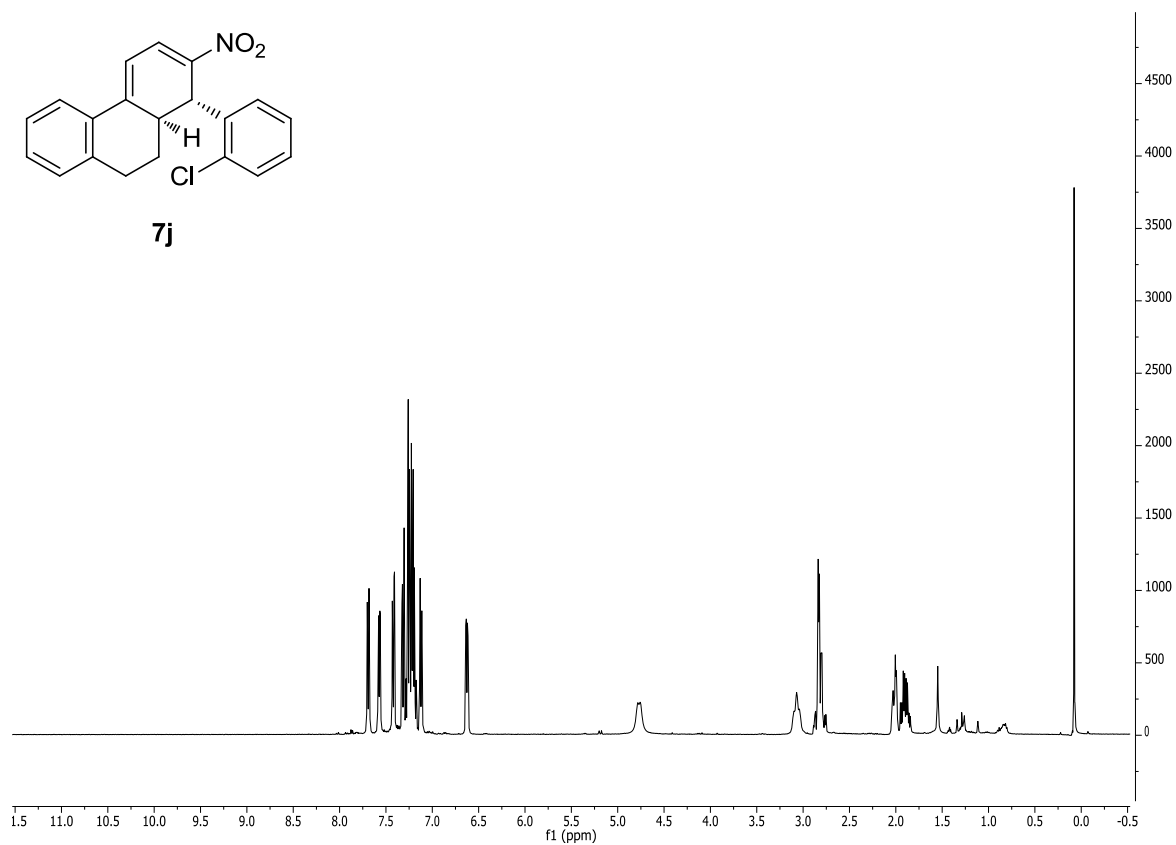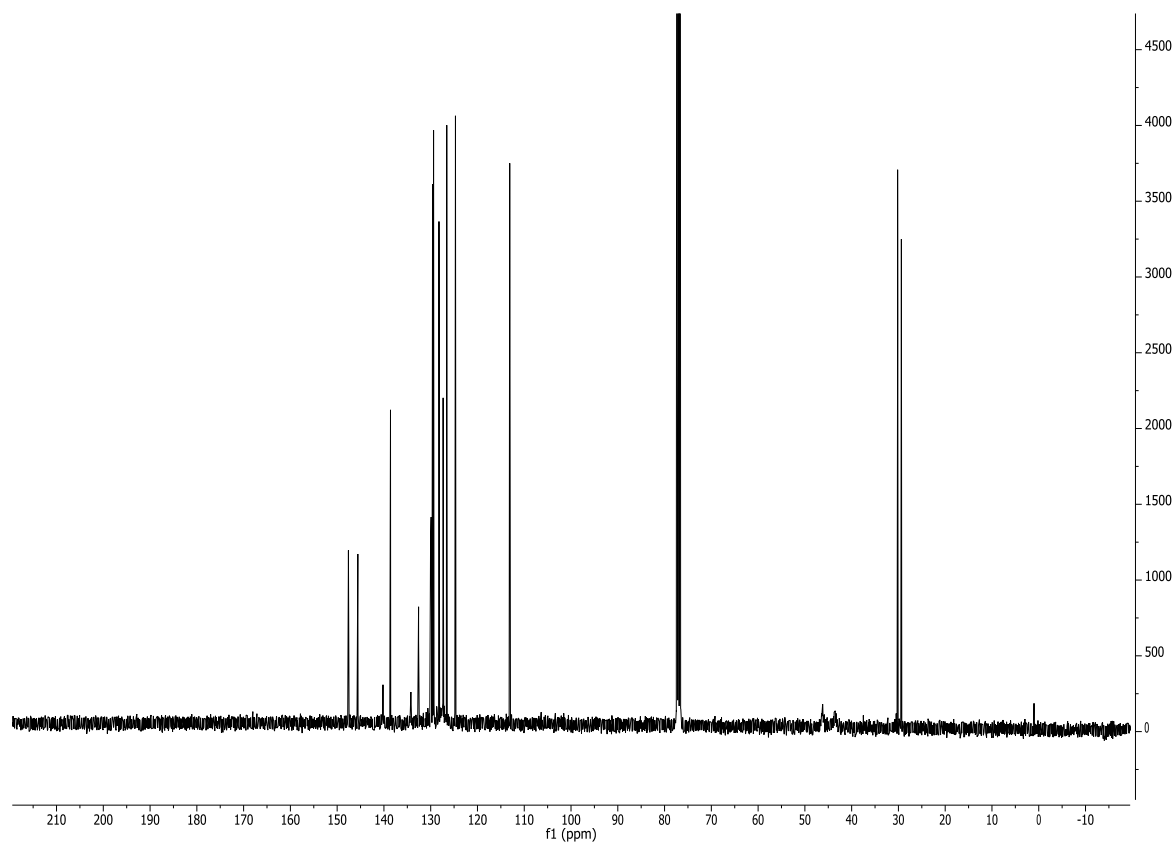

## 6. UPC<sup>2</sup> traces

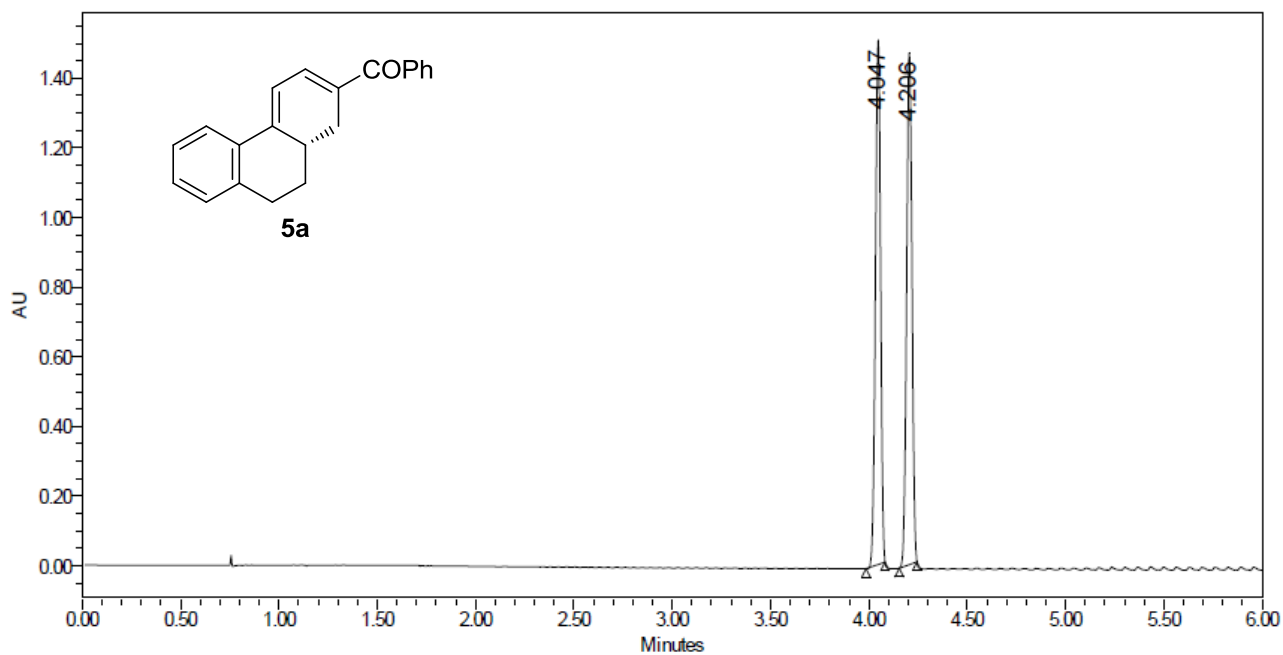

|   | Retention Time (min) | % Area |
|---|----------------------|--------|
| 1 | 4.206                | 50.36  |
| 2 | 4.047                | 49.64  |

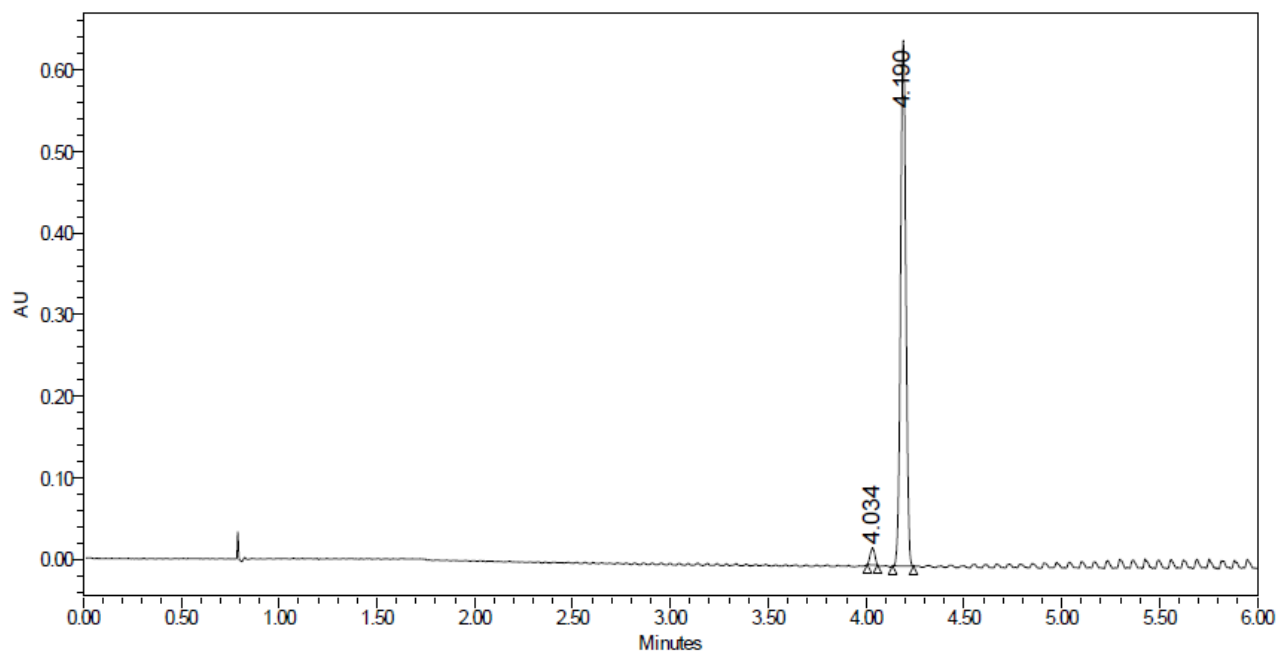

|   | Retention Time (min) | % Area |
|---|----------------------|--------|
| 1 | 4.034                | 2.69   |
| 2 | 4.190                | 97.31  |

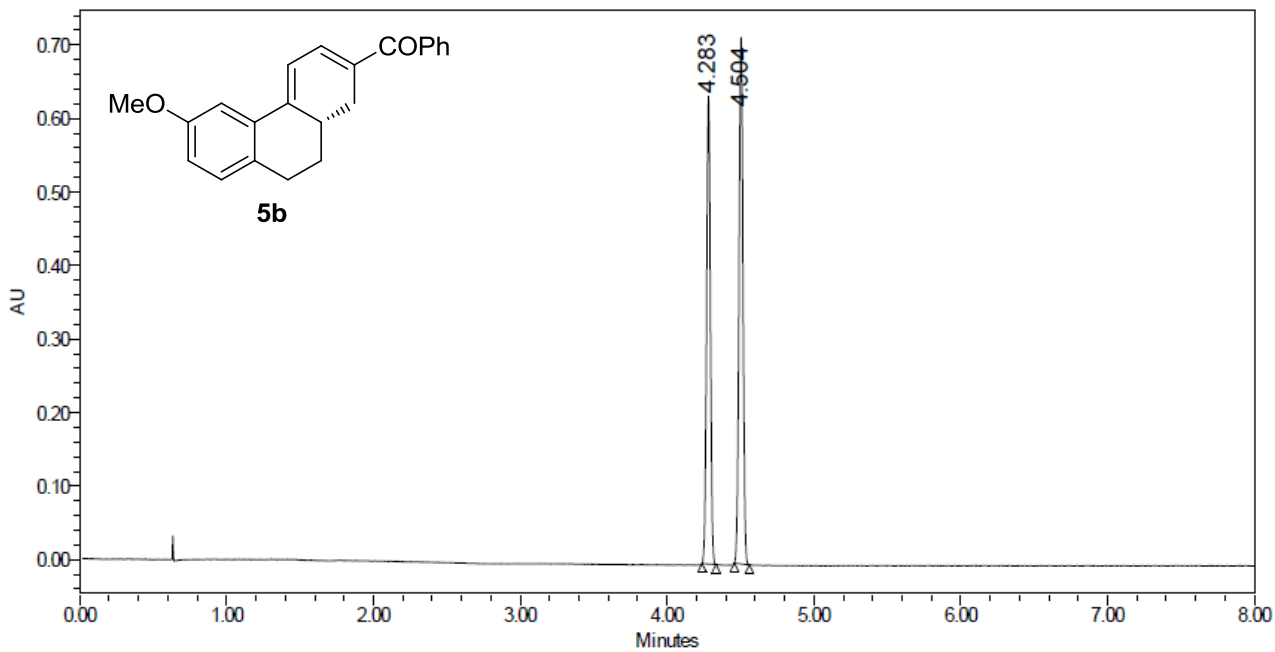

|   | Retention Time (min) | % Area |
|---|----------------------|--------|
| 1 | 4.283                | 46.01  |
| 2 | 4.504                | 53.99  |

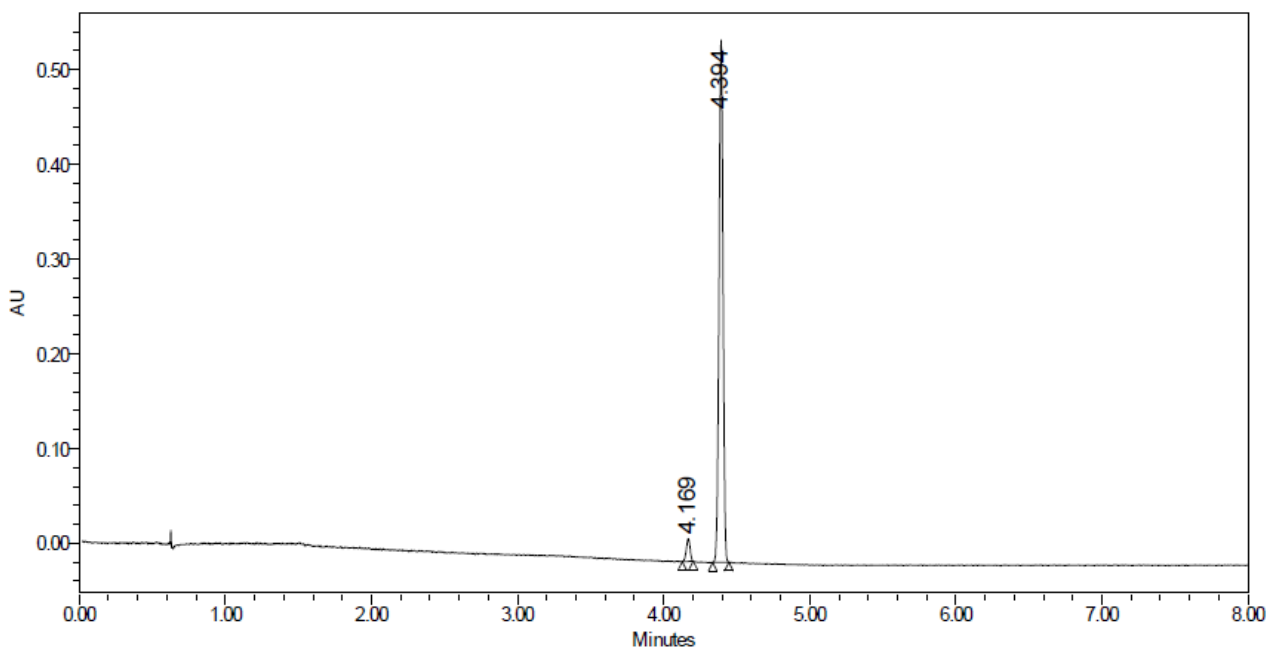

|   | Retention Time (min) | % Area |
|---|----------------------|--------|
| 1 | 4.169                | 3.93   |
| 2 | 4.394                | 96.07  |

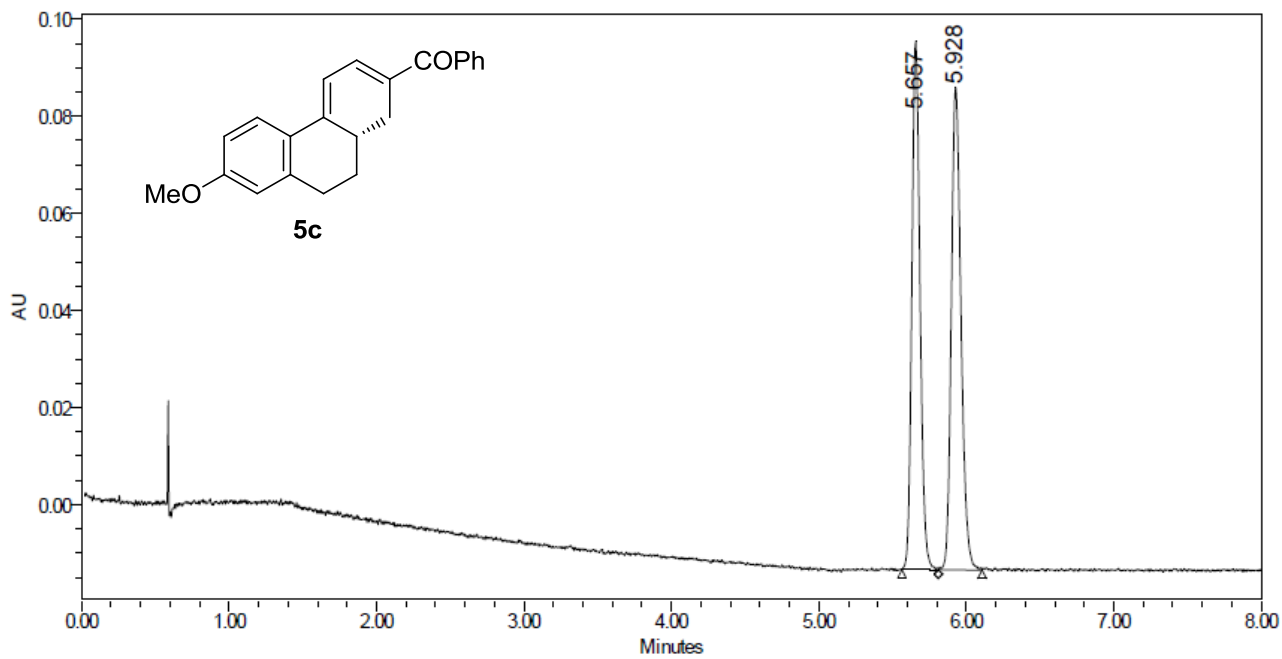

|   | Retention Time (min) | % Area |
|---|----------------------|--------|
| 1 | 5.657                | 48.05  |
| 2 | 5.928                | 51.95  |

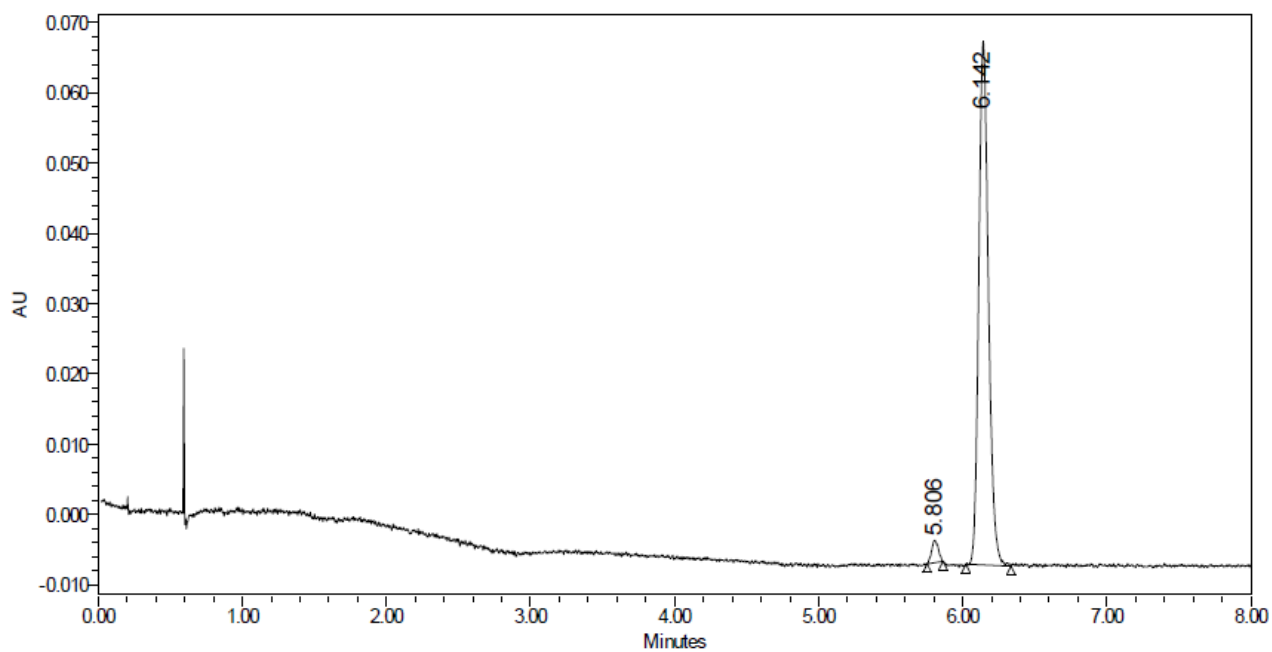

|   | Retention Time (min) | % Area |
|---|----------------------|--------|
| 1 | 5.806                | 2.88   |
| 2 | 6.142                | 97.12  |

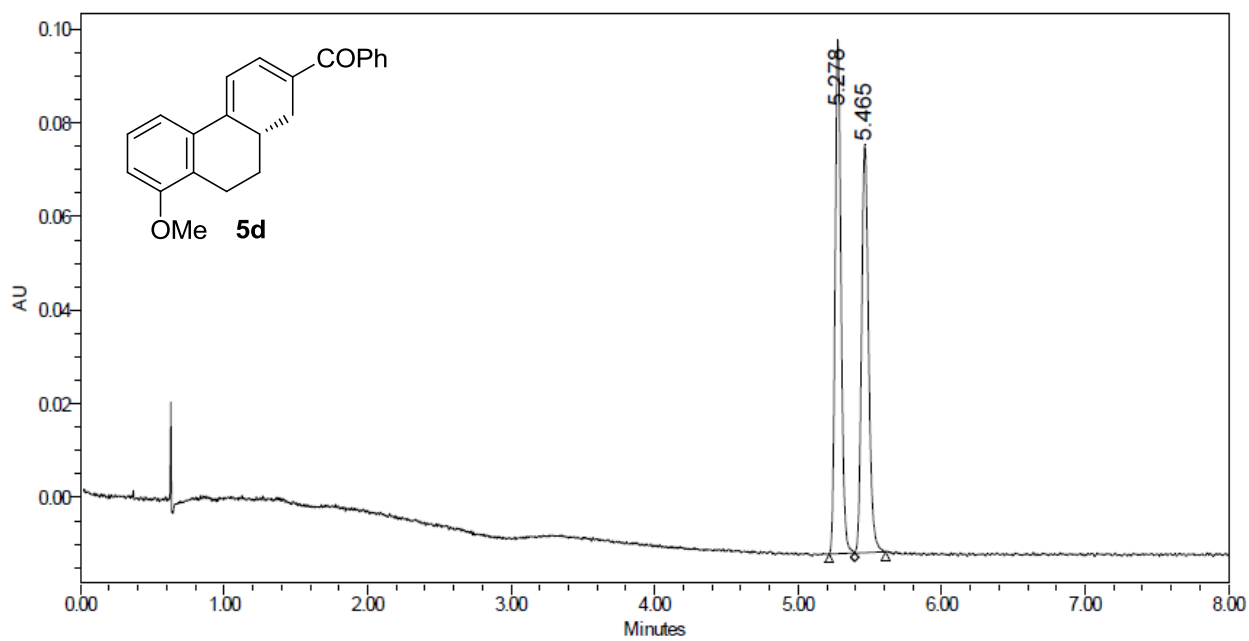

|   | Retention Time (min) | % Area |
|---|----------------------|--------|
| 1 | 5.278                | 51.54  |
| 2 | 5.465                | 48.46  |

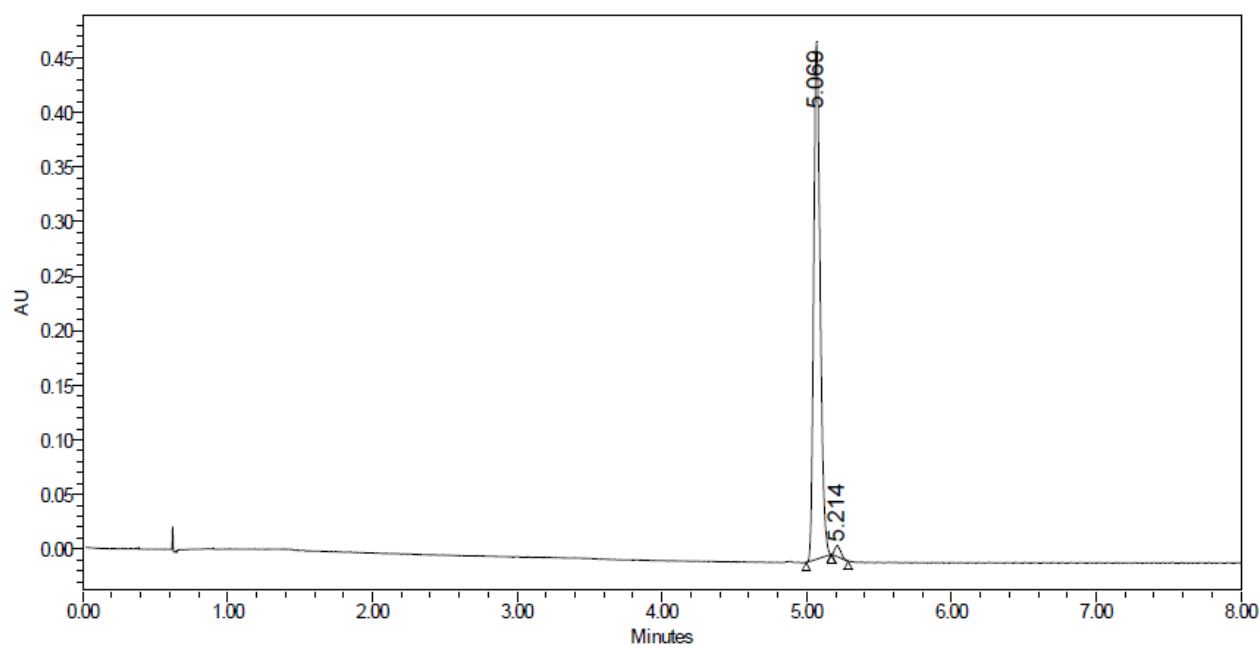

|   | Retention Time (min) | % Area |
|---|----------------------|--------|
| 1 | 5.069                | 98.10  |
| 2 | 5.214                | 1.90   |

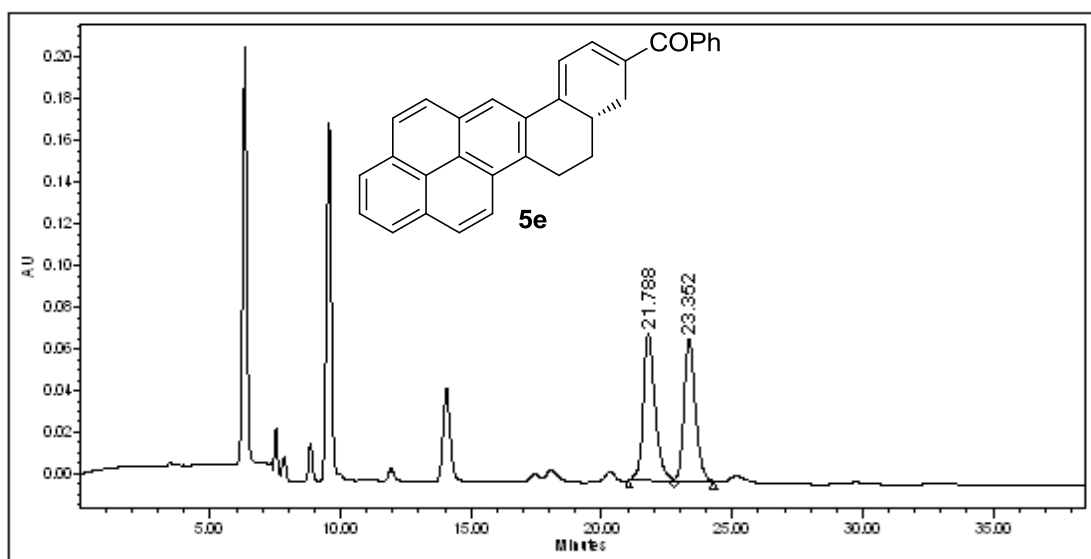

| RT | Area    | % Area | Height |
|----|---------|--------|--------|
| 1  | 2198747 | 51.77  | 70316  |
| 2  | 2048623 | 48.23  | 67847  |

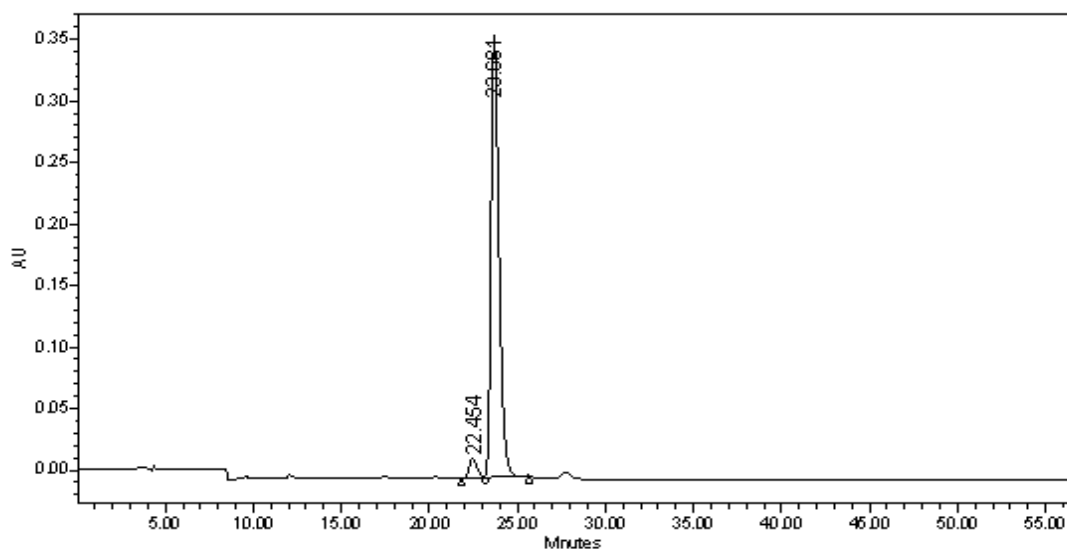

| RT | Area     | % Area | Height |
|----|----------|--------|--------|
| 1  | 488053   | 4.14   | 16207  |
| 2  | 11297024 | 95.86  | 358442 |

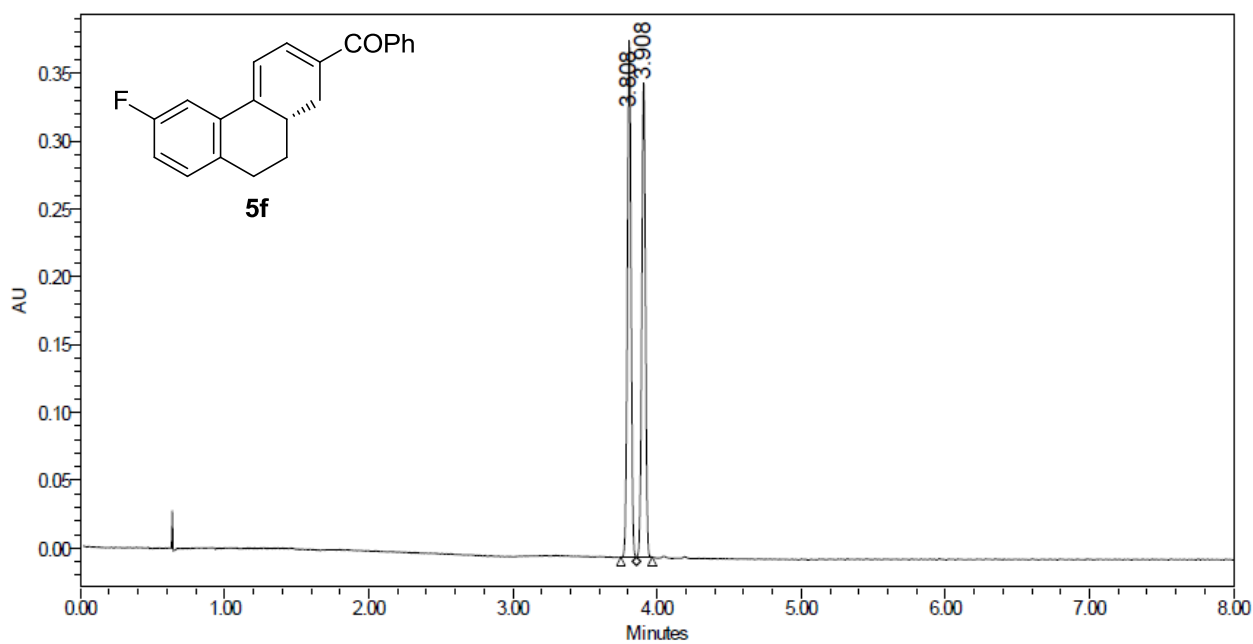

|   | Retention Time (min) | % Area |
|---|----------------------|--------|
| 1 | 3.808                | 52.01  |
| 2 | 3.908                | 47.99  |

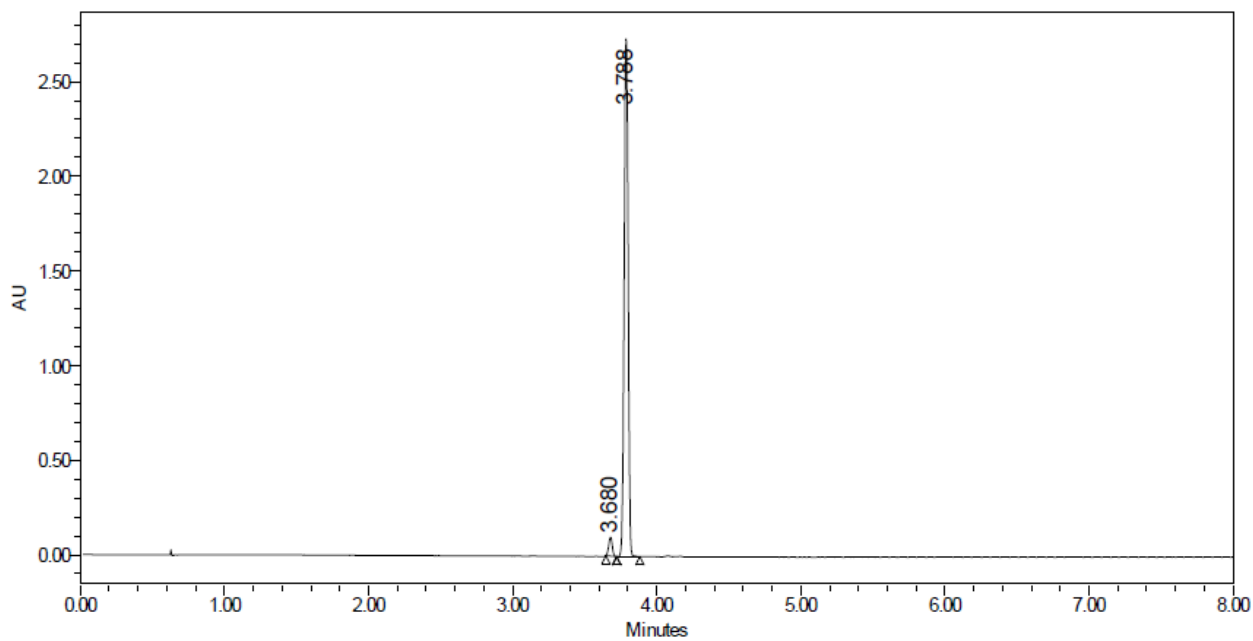

|   | Retention Time (min) | % Area |
|---|----------------------|--------|
| 1 | 3.680                | 3.12   |
| 2 | 3.788                | 96.88  |

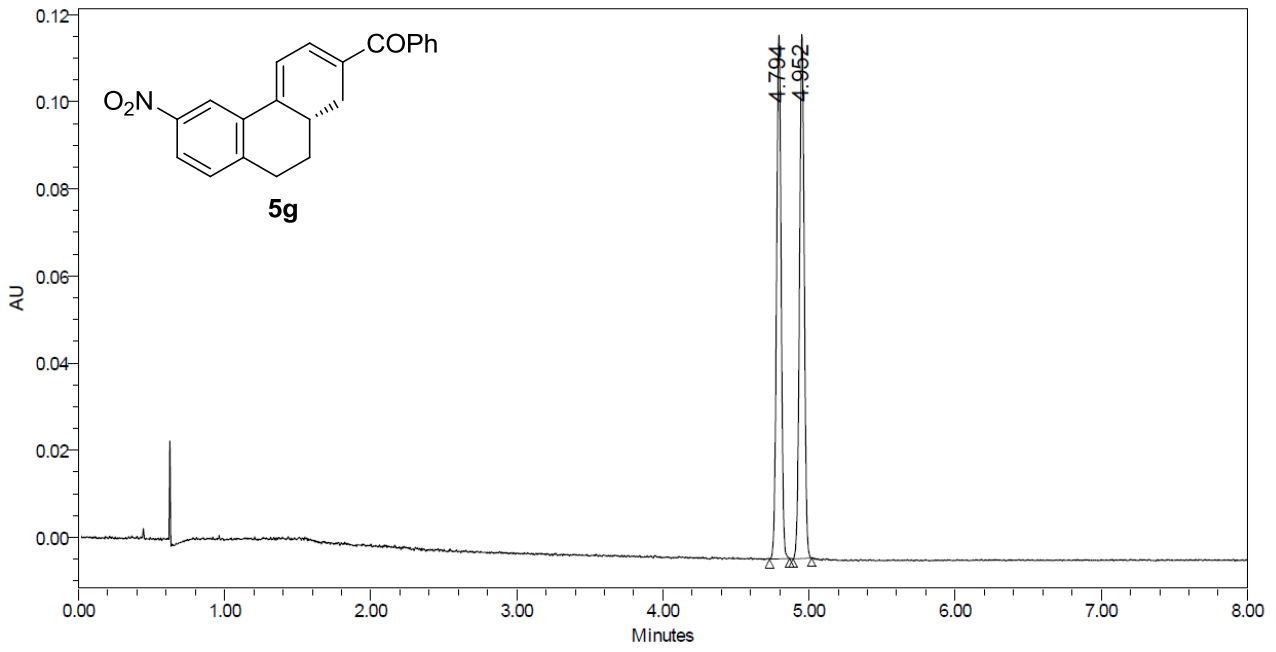

|   | Retention Time (min) | % Area |
|---|----------------------|--------|
| 1 | 4.794                | 49.14  |
| 2 | 4.952                | 50.86  |

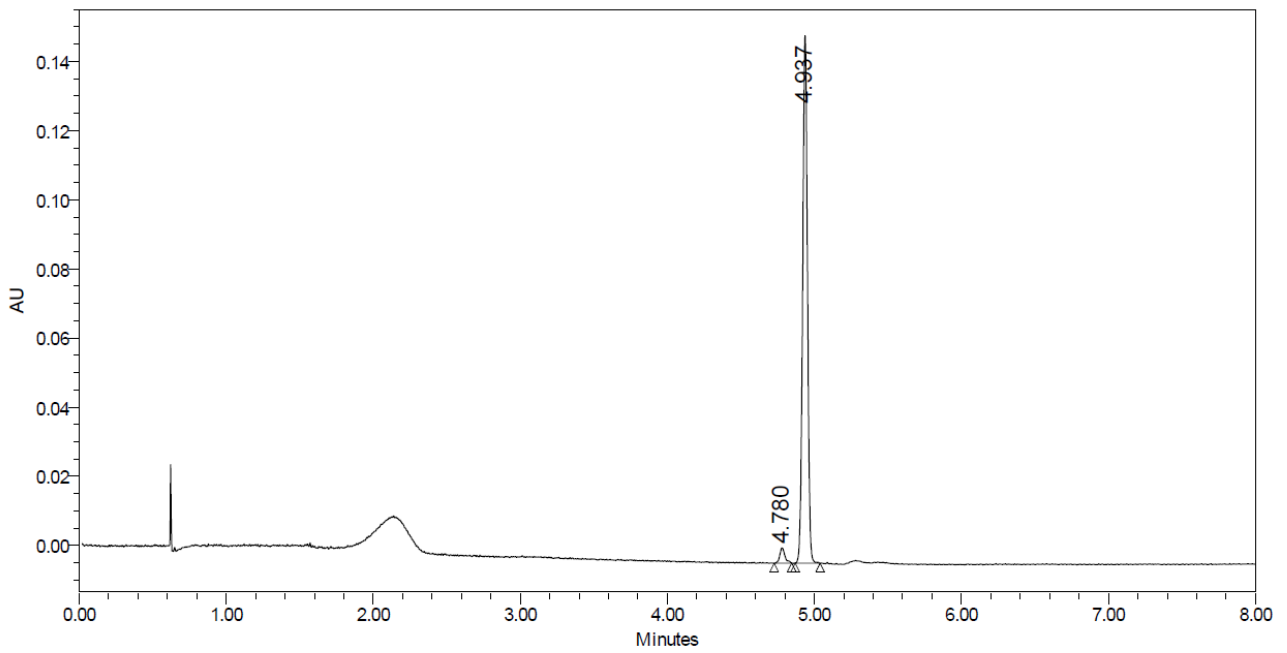

|   | Retention Time (min) | % Area |
|---|----------------------|--------|
| 1 | 4.780                | 3.04   |
| 2 | 4.937                | 96.96  |



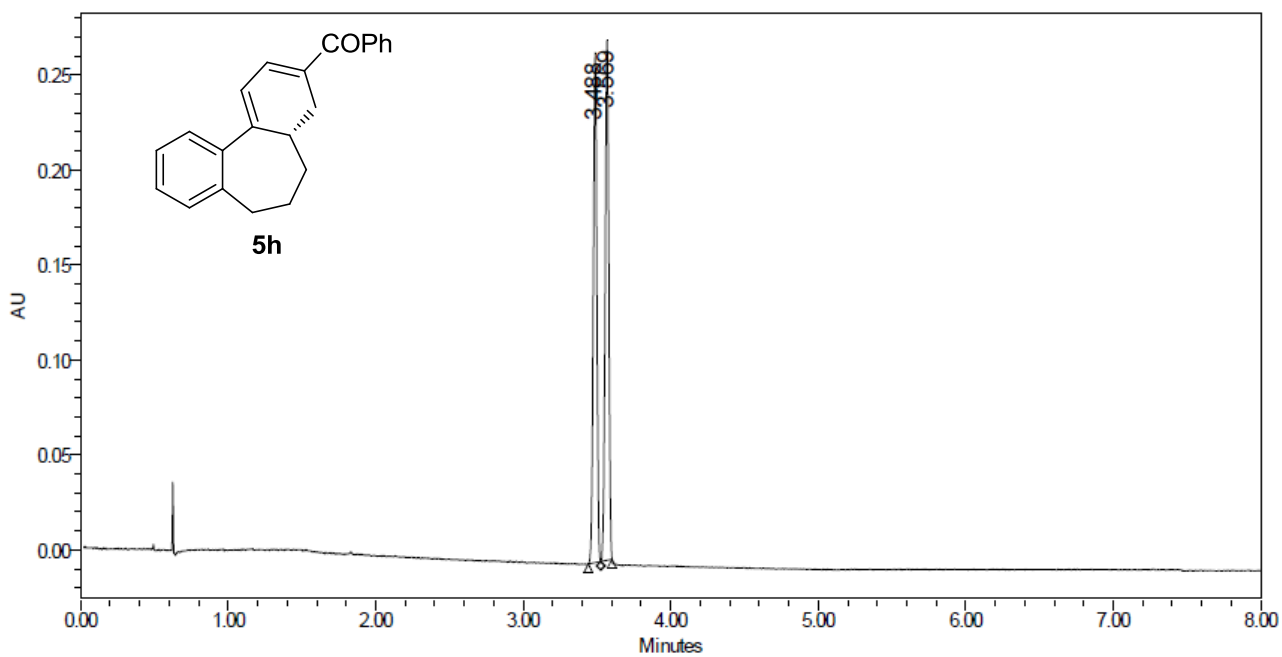

|   | Retention Time (min) | % Area |
|---|----------------------|--------|
| 1 | 3.488                | 49.02  |
| 2 | 3.569                | 50.98  |

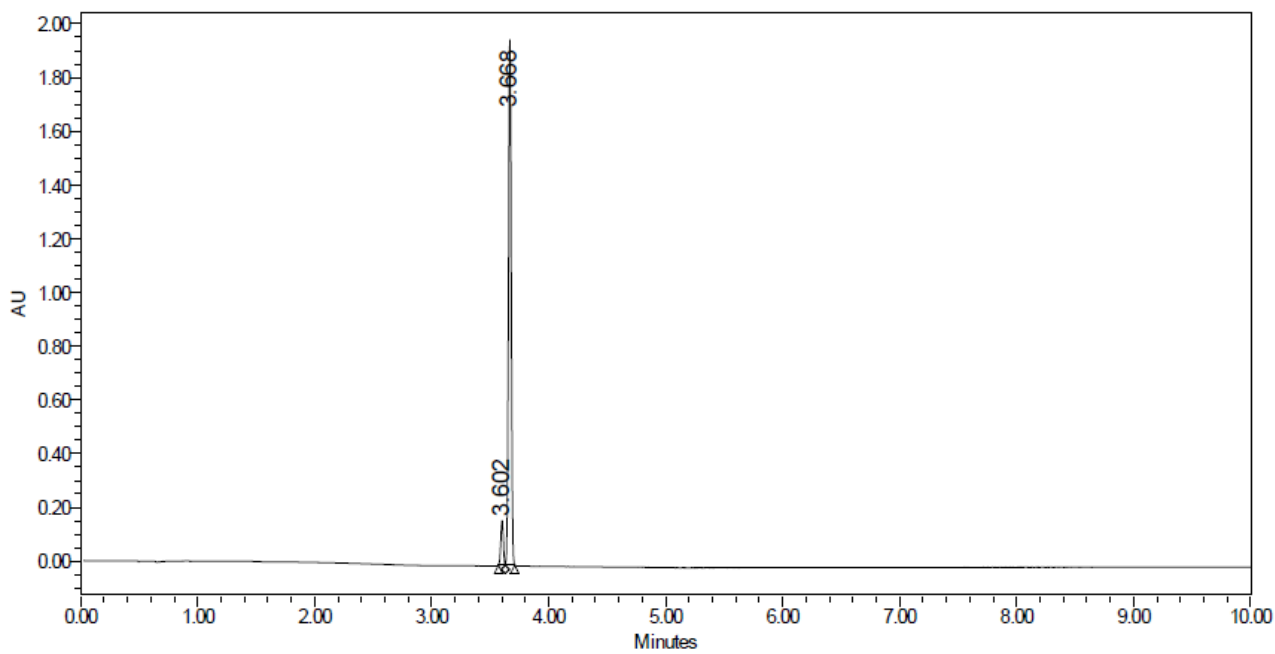

|   | Retention Time (min) | % Area |
|---|----------------------|--------|
| 1 | 3.602                | 7.05   |
| 2 | 3.668                | 92.95  |

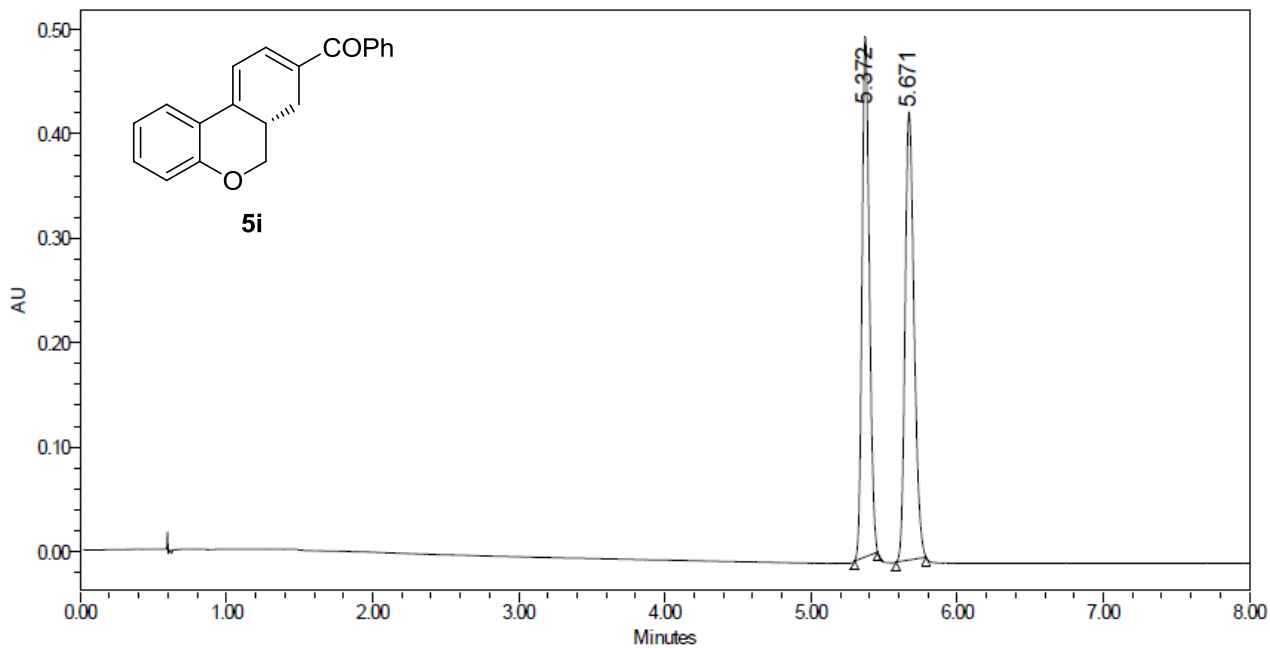

|   | Retention Time (min) | % Area |
|---|----------------------|--------|
| 1 | 5.372                | 48.49  |
| 2 | 5.671                | 51.51  |

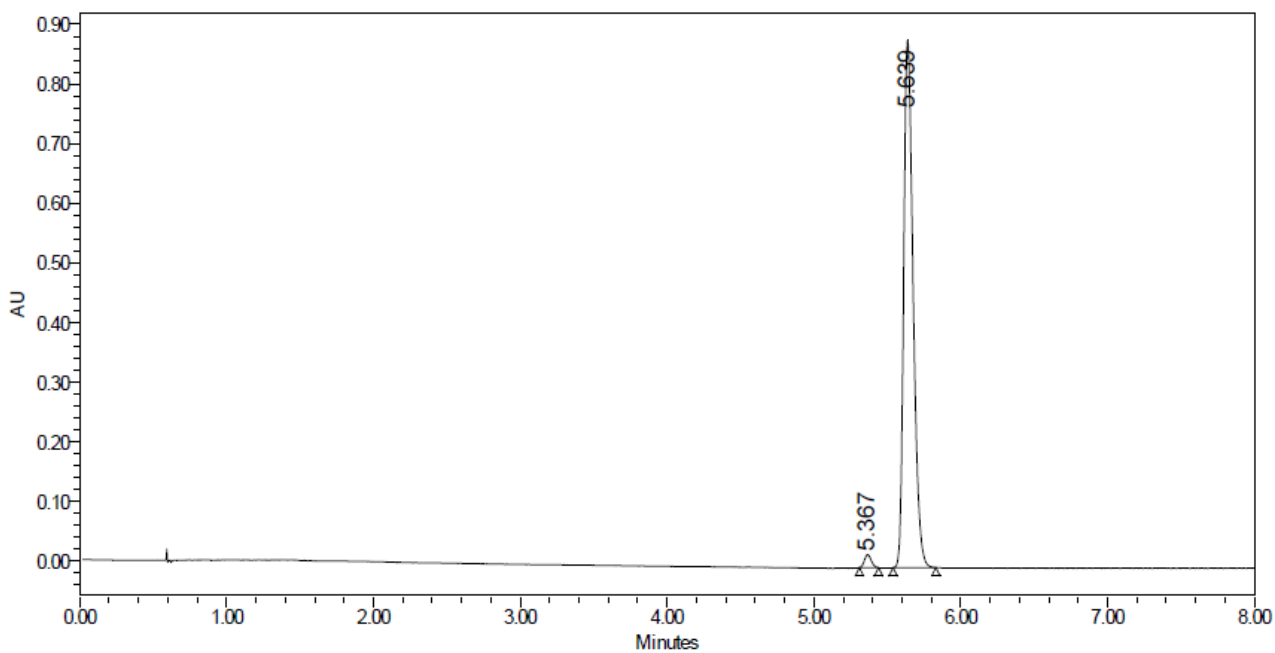

|   | Retention Time (min) | % Area |
|---|----------------------|--------|
| 1 | 5.367                | 1.77   |
| 2 | 5.639                | 98.23  |

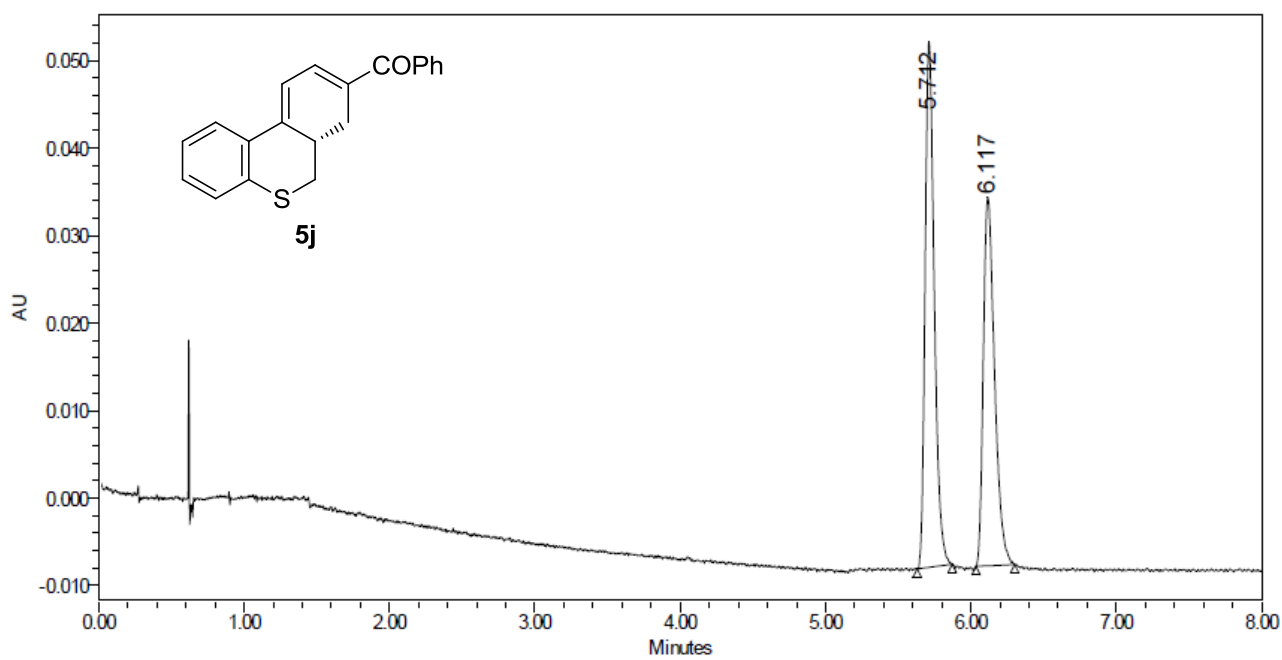

|   | Retention Time (min) | % Area |
|---|----------------------|--------|
| 1 | 5.712                | 53.83  |
| 2 | 6.117                | 46.17  |

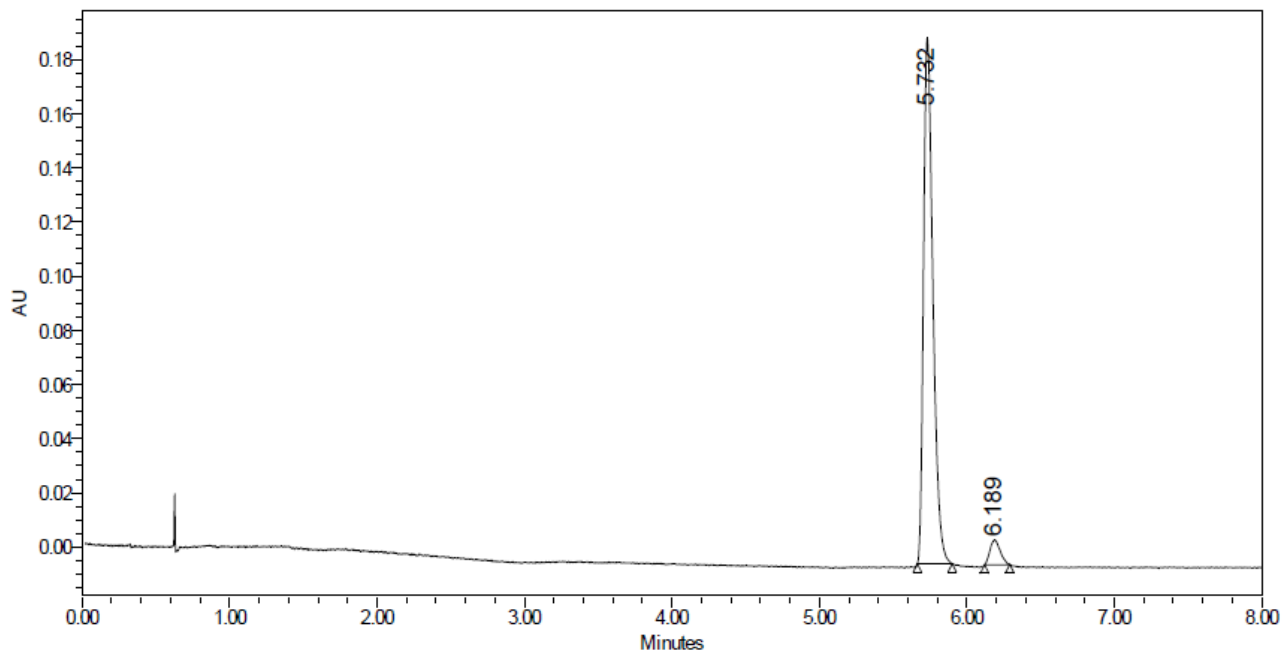

|   | Retention Time (min) | % Area |
|---|----------------------|--------|
| 1 | 5.732                | 95.15  |
| 2 | 6.189                | 4.85   |

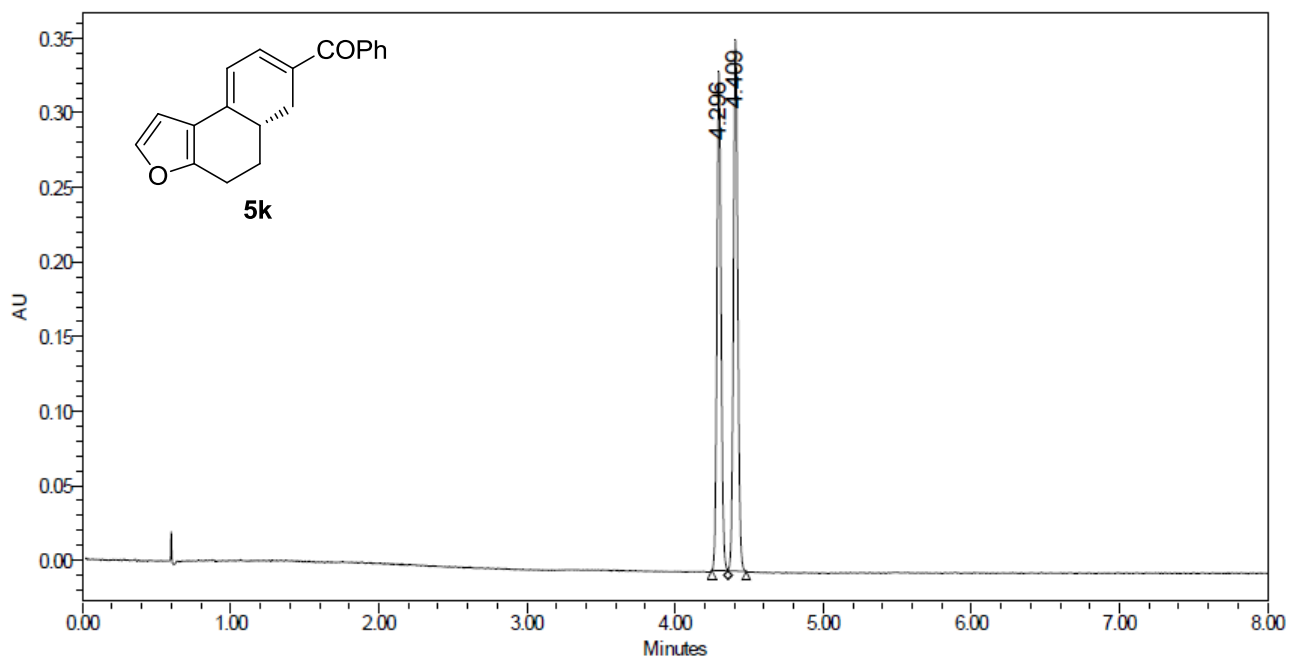

|   | Retention Time (min) | % Area |
|---|----------------------|--------|
| 1 | 4.296                | 47.40  |
| 2 | 4.409                | 52.60  |

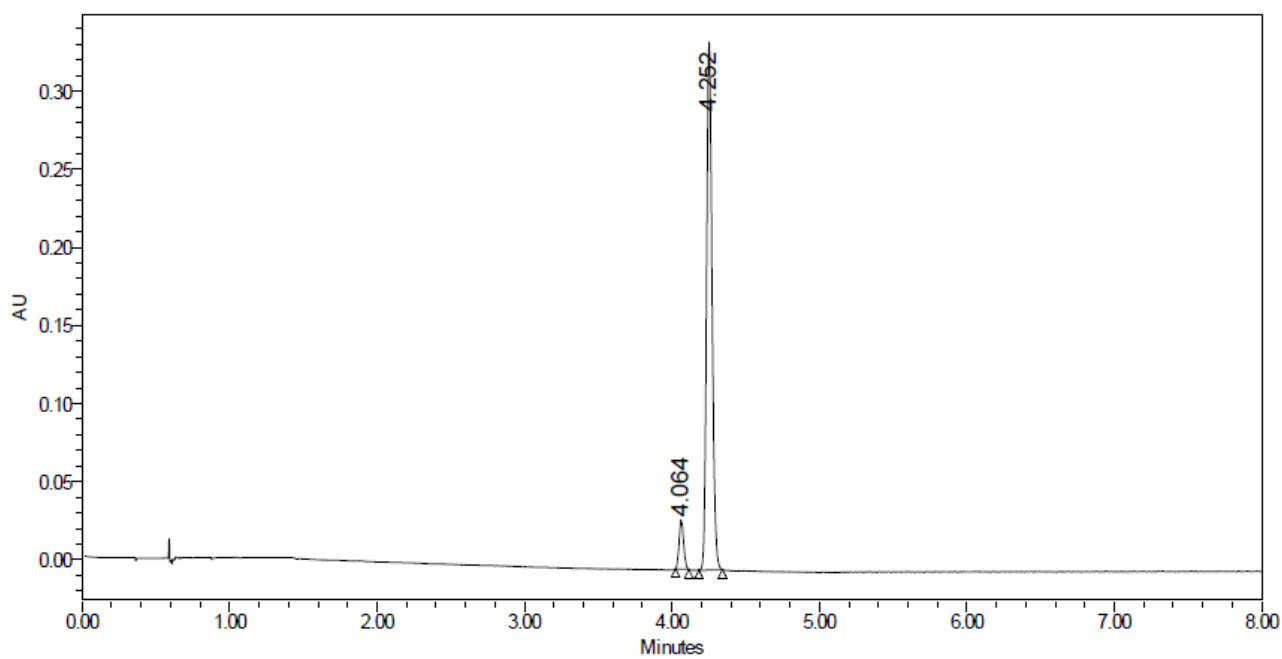

|   | Retention Time (min) | % Area |
|---|----------------------|--------|
| 1 | 4.064                | 7.12   |
| 2 | 4.252                | 92.88  |

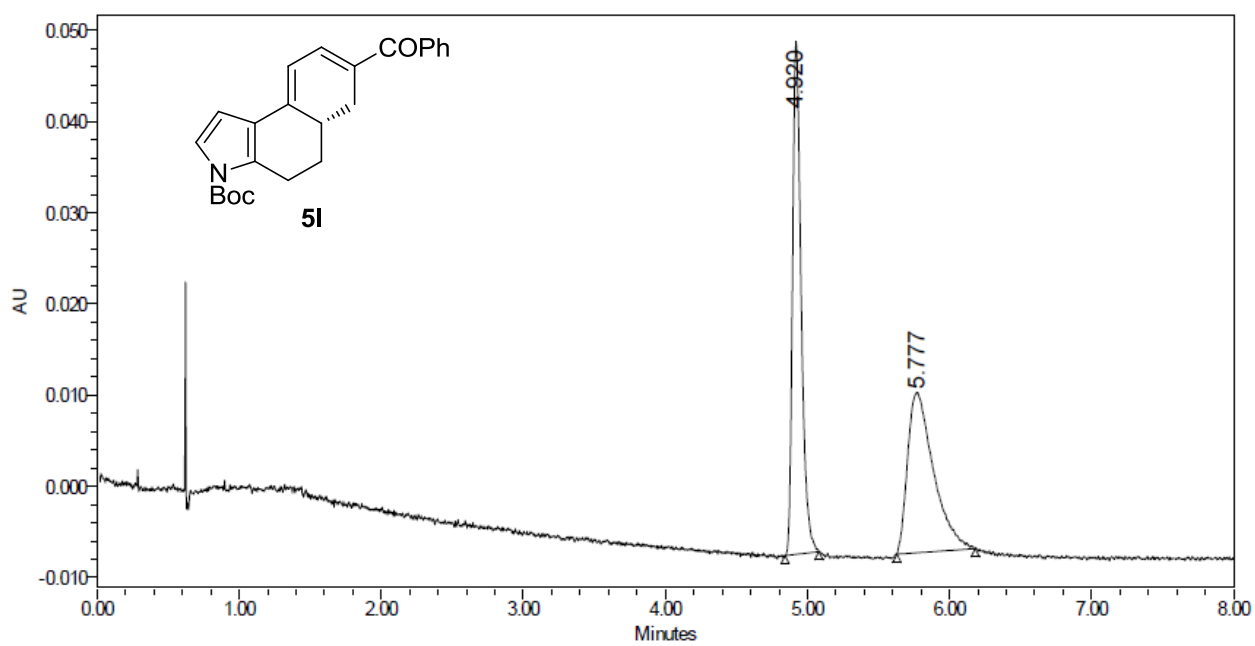

|   | Retention Time (min) | % Area |
|---|----------------------|--------|
| 1 | 4.920                | 51.52  |
| 2 | 5.777                | 48.48  |

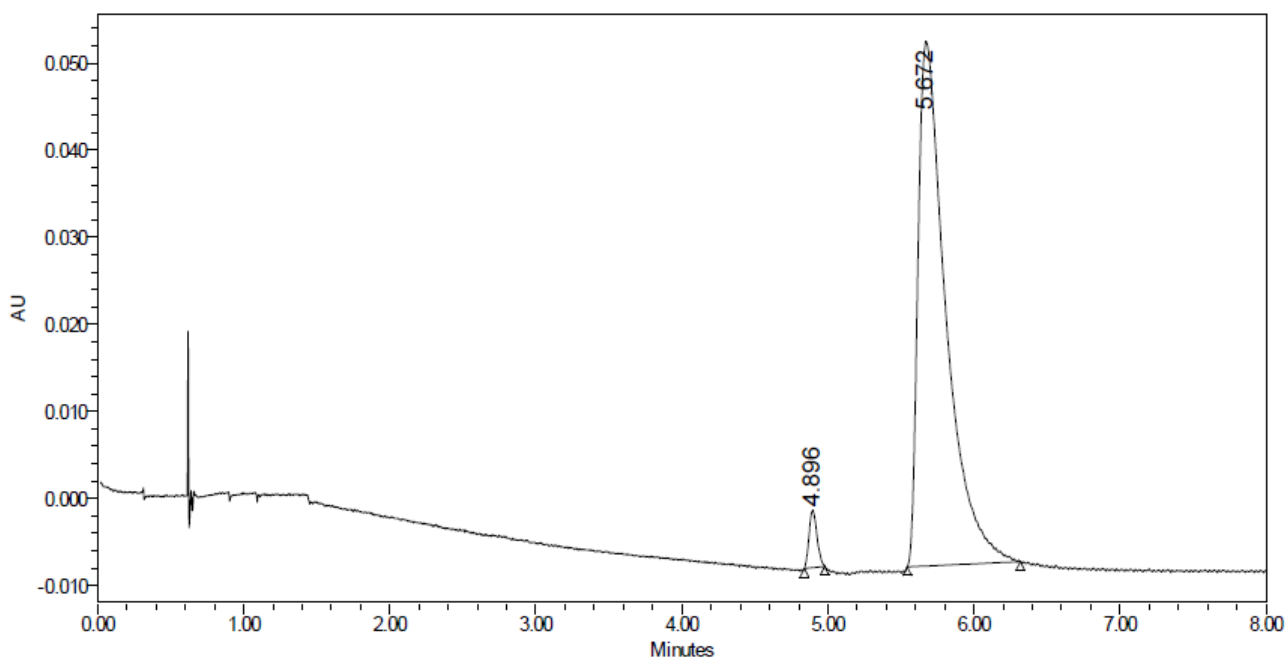

|   | Retention Time (min) | % Area |
|---|----------------------|--------|
| 1 | 4.896                | 3.02   |
| 2 | 5.672                | 96.98  |

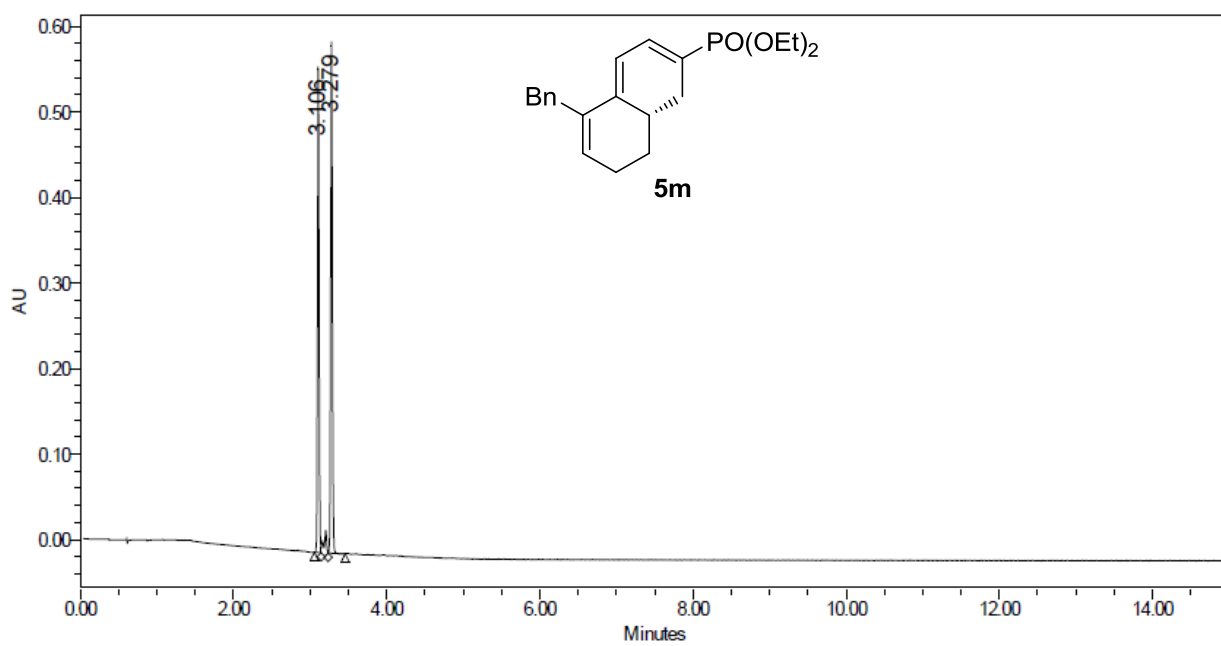

|   | Retention Time (min) | % Area |
|---|----------------------|--------|
| 1 | 3.106                | 46.52  |
| 2 | 3.279                | 53.48  |

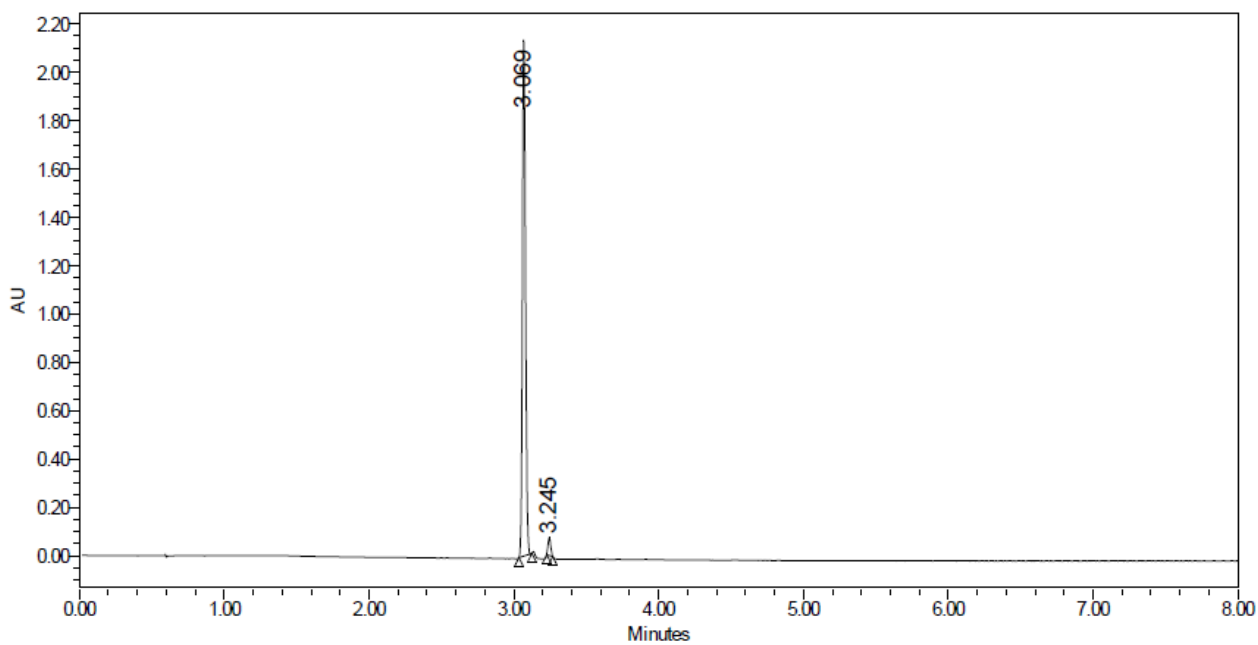

|   | Retention Time (min) | % Area |
|---|----------------------|--------|
| 1 | 3.069                | 97.13  |
| 2 | 3.245                | 2.87   |

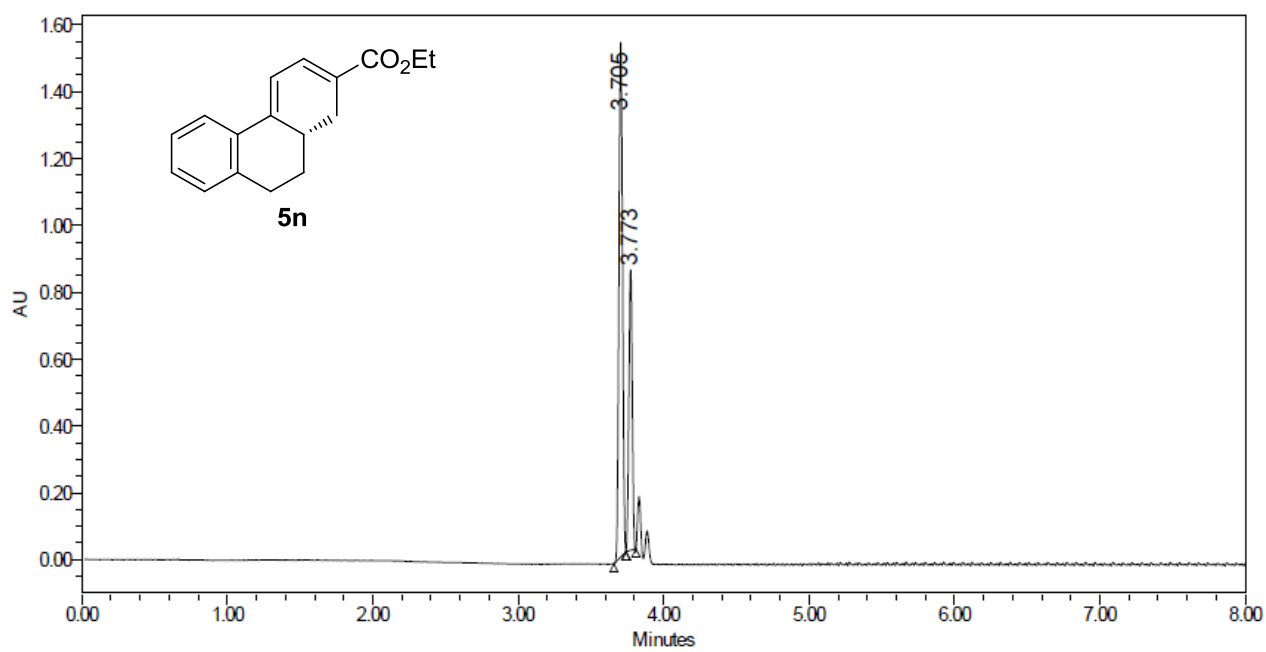

|   | Retention Time (min) | % Area |
|---|----------------------|--------|
| 1 | 3.705                | 66.45  |
| 2 | 3.773                | 33.55  |

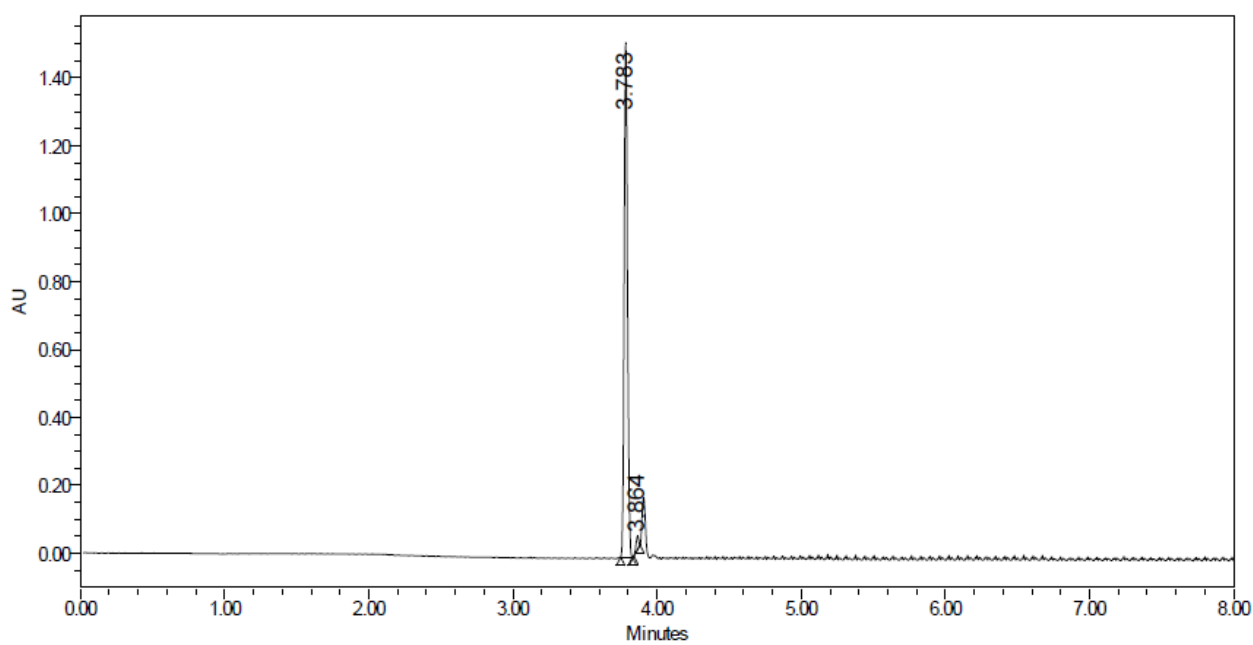

|   | Retention Time (min) | % Area |
|---|----------------------|--------|
| 1 | 3.783                | 98.02  |
| 2 | 3.864                | 1.98   |

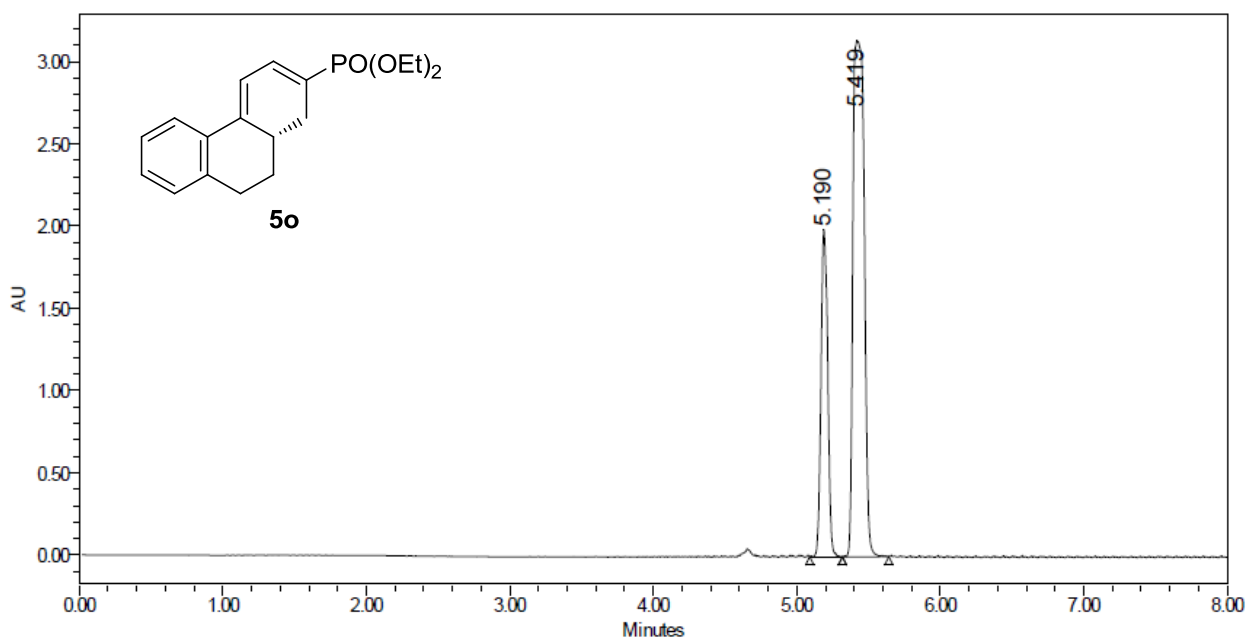

|   | Retention Time (min) | % Area |
|---|----------------------|--------|
| 1 | 5.190                | 27.54  |
| 2 | 5.419                | 72.46  |

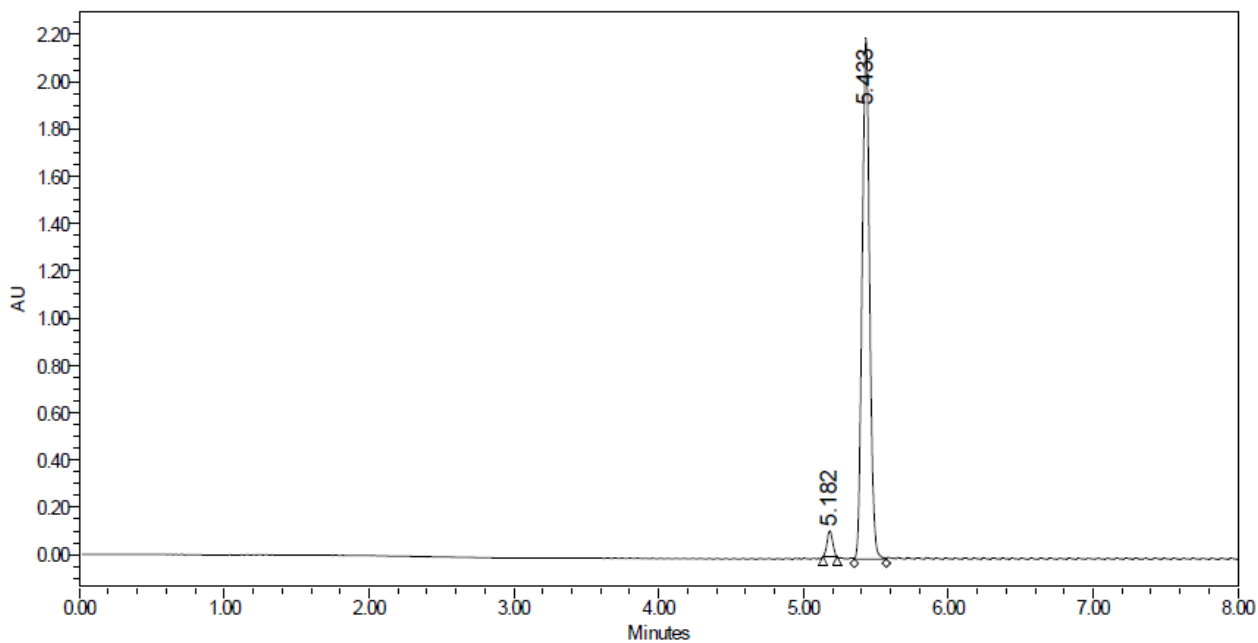

|   | Retention Time (min) | % Area |
|---|----------------------|--------|
| 1 | 5.182                | 3.49   |
| 2 | 5.433                | 96.51  |



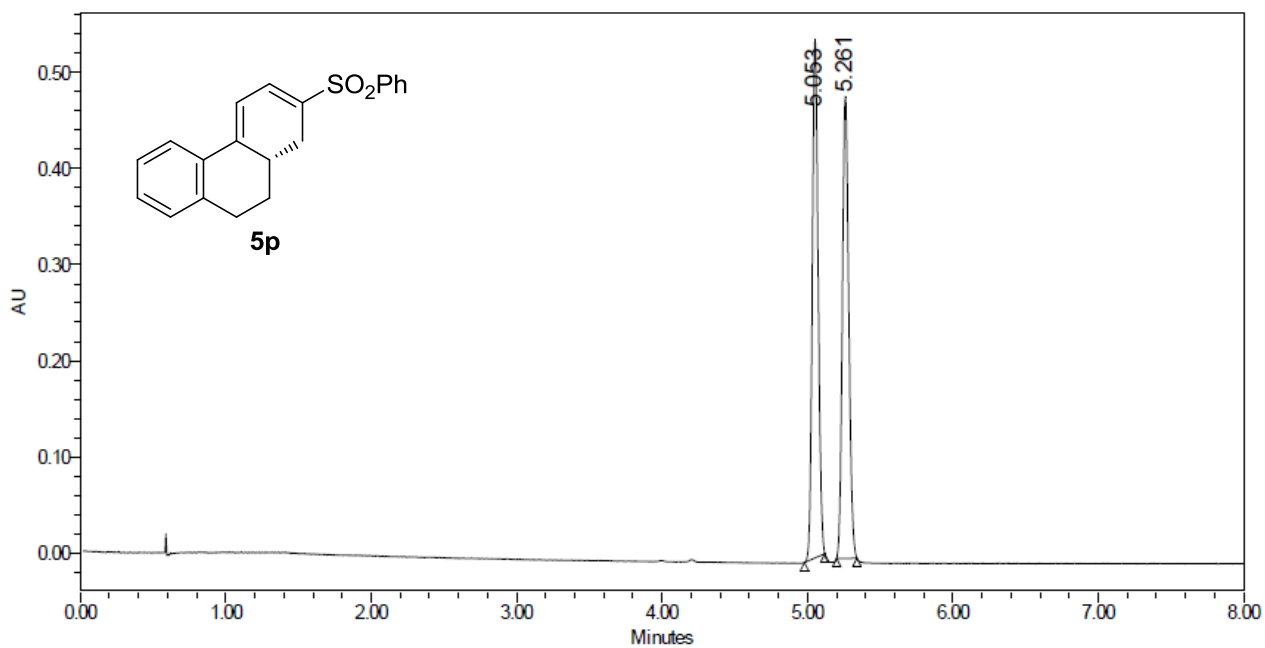

|   | Retention Time (min) | % Area |
|---|----------------------|--------|
| 1 | 5.053                | 50.76  |
| 2 | 5.261                | 49.24  |

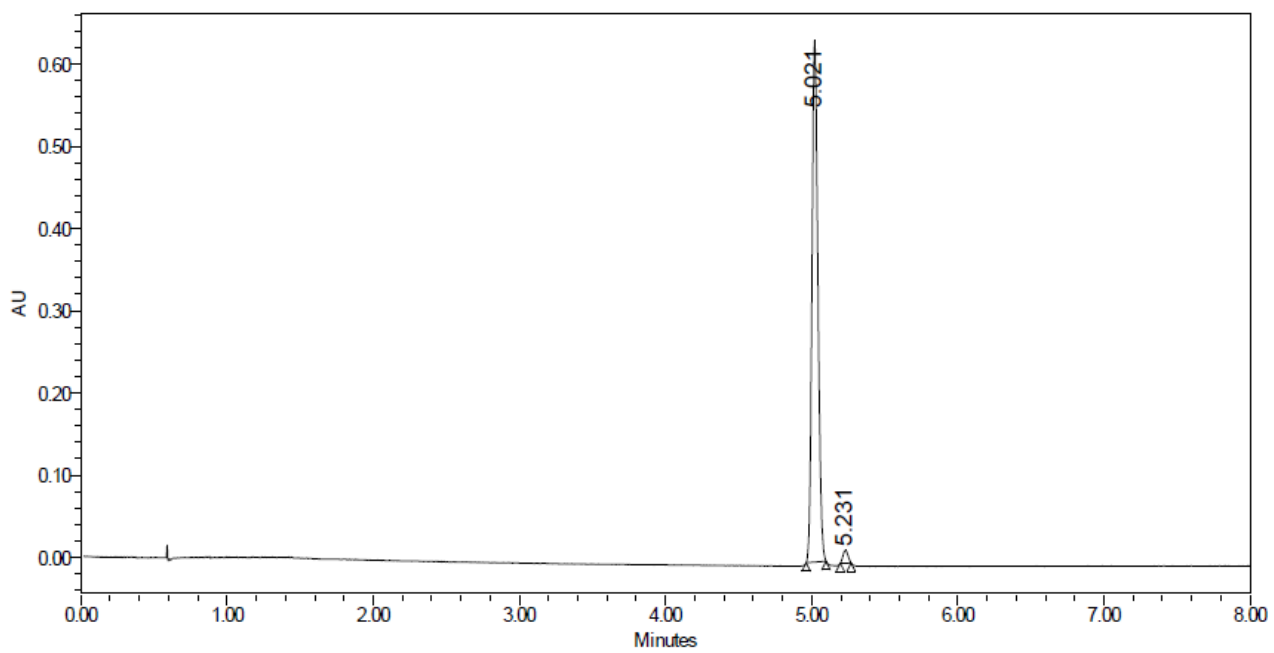

|   | Retention Time (min) | % Area |
|---|----------------------|--------|
| 1 | 5.021                | 97.96  |
| 2 | 5.231                | 2.04   |

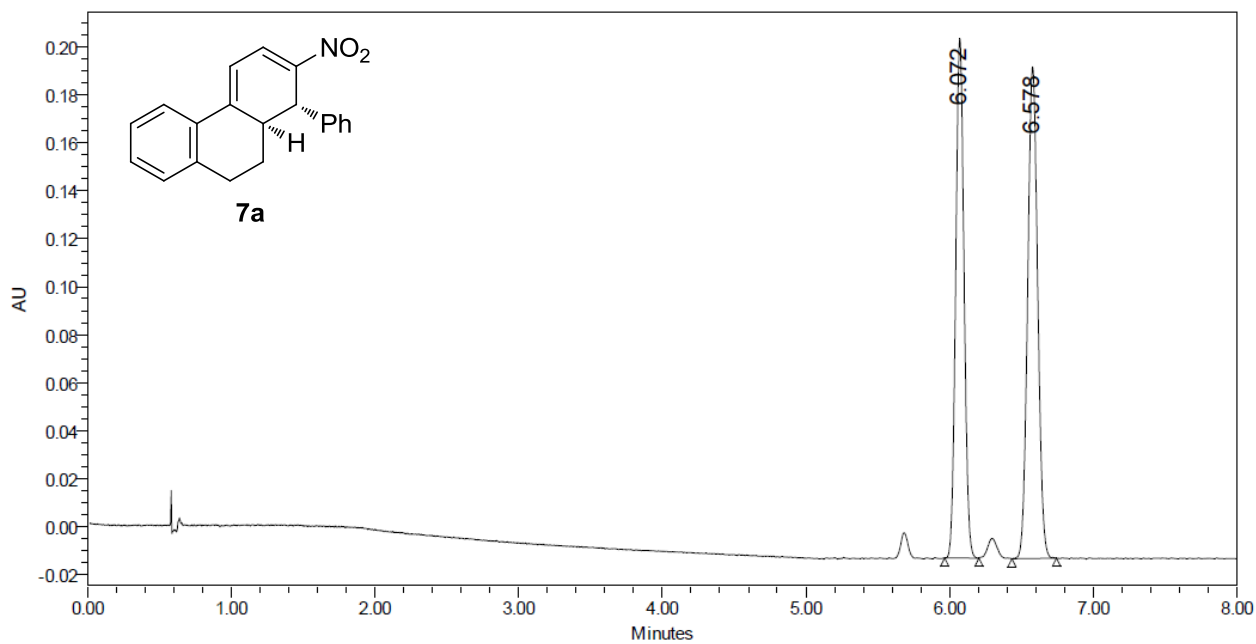

|   | Retention Time (min) | % Area |
|---|----------------------|--------|
| 1 | 6.072                | 46.66  |
| 2 | 6.578                | 53.34  |

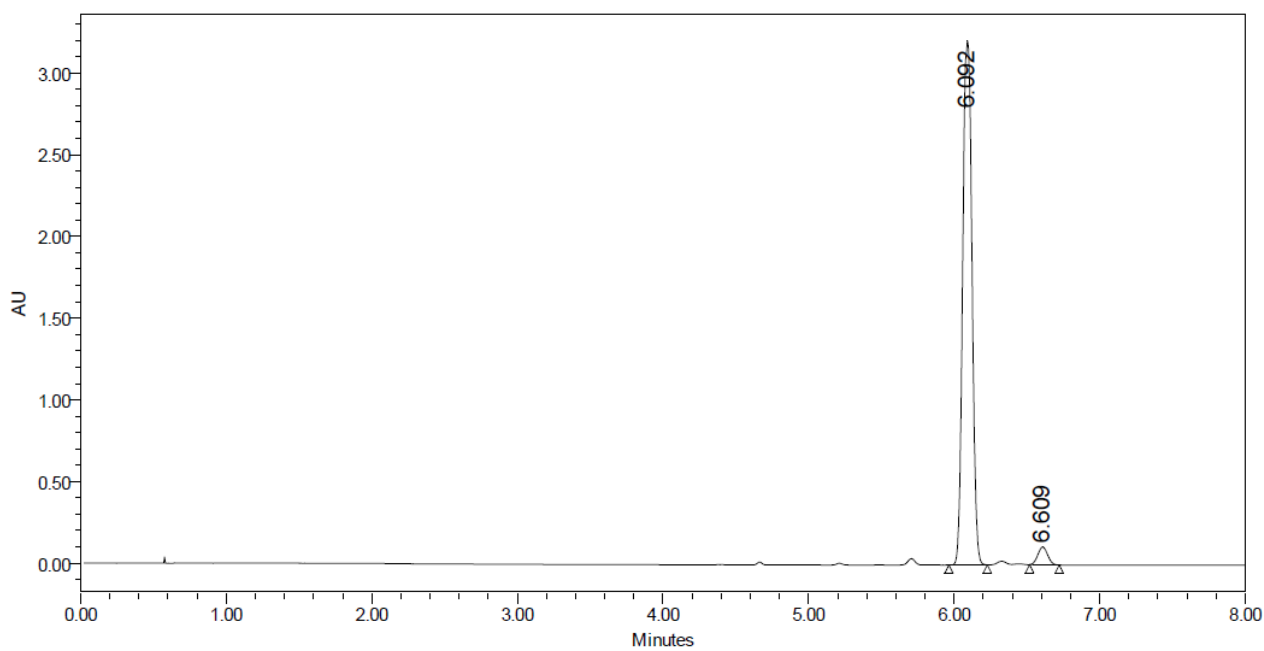

|   | Retention Time (min) | % Area |
|---|----------------------|--------|
| 1 | 6.092                | 96.52  |
| 2 | 6.609                | 3.48   |

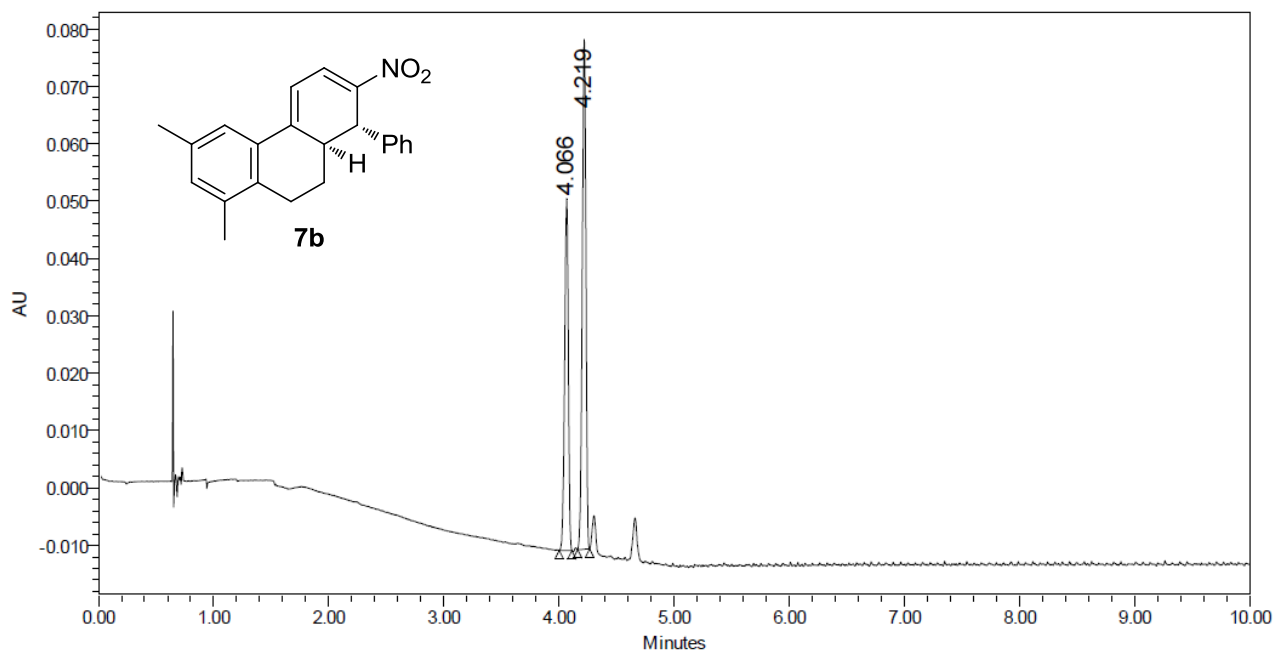

|   | Retention Time (min) | % Area |
|---|----------------------|--------|
| 1 | 4.066                | 41.06  |
| 2 | 4.219                | 58.94  |

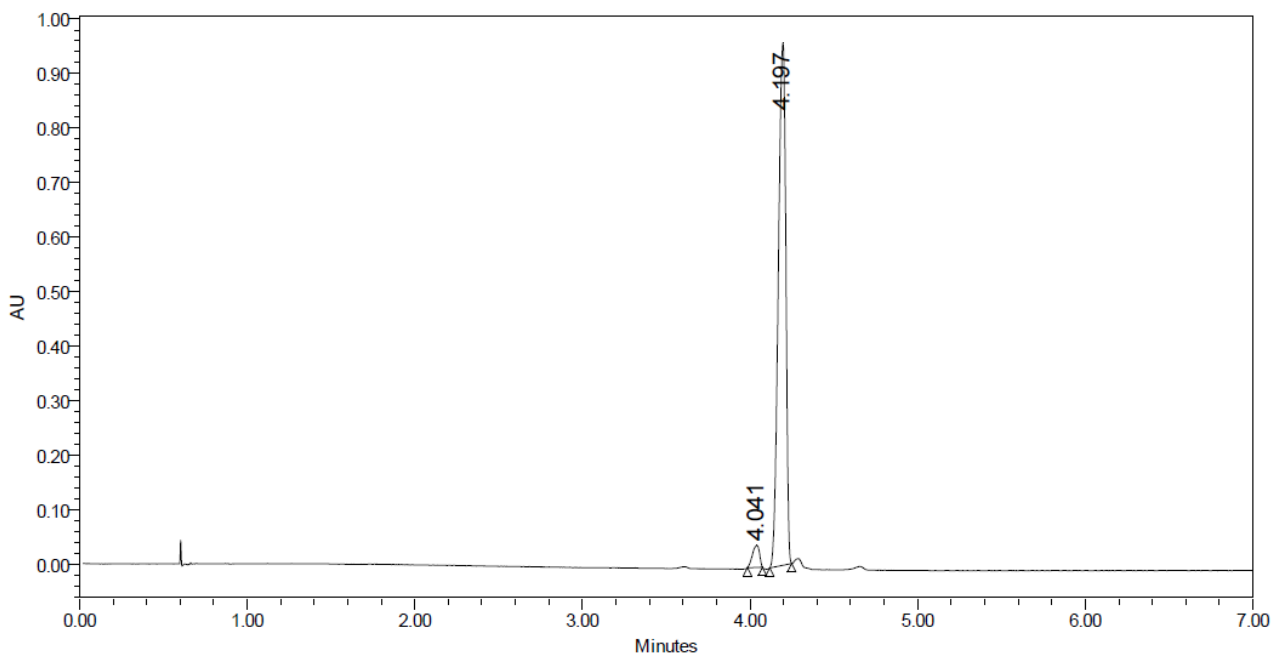

|   | Retention Time (min) | % Area |
|---|----------------------|--------|
| 1 | 4.041                | 3.80   |
| 2 | 4.197                | 96.20  |

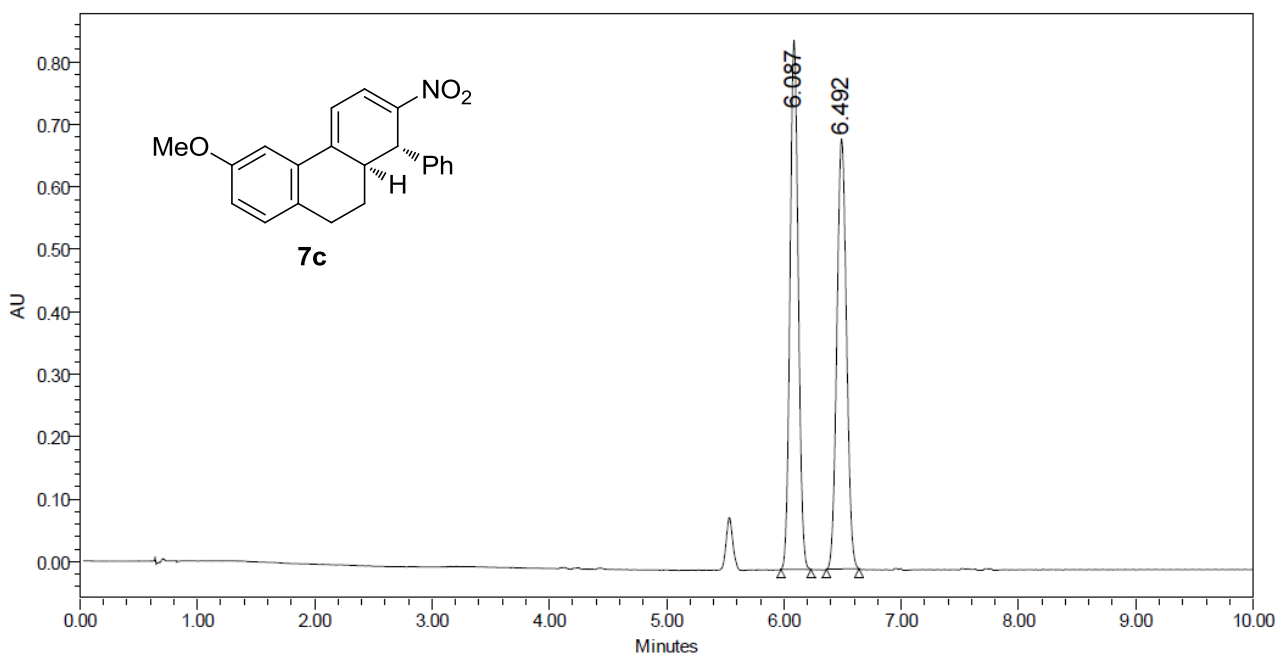

|   | Retention Time (min) | % Area |
|---|----------------------|--------|
| 1 | 6.087                | 51.23  |
| 2 | 6.492                | 48.77  |

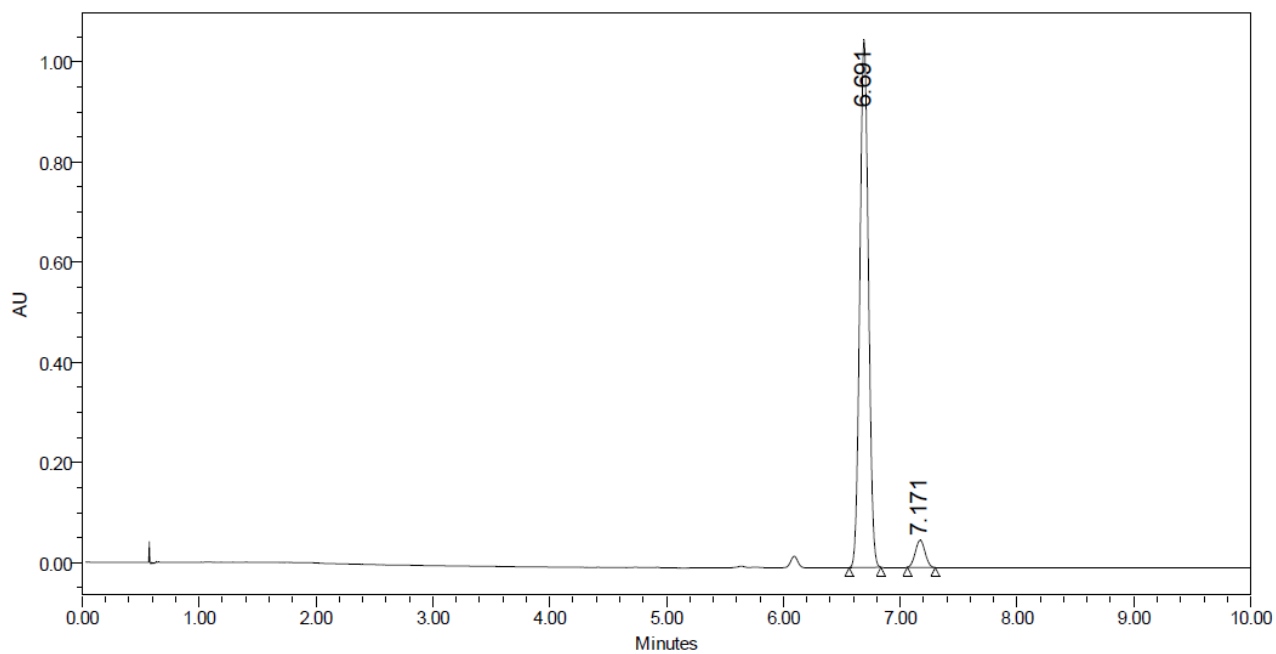

|   | Retention Time (min) | % Area |
|---|----------------------|--------|
| 1 | 6.691                | 94.45  |
| 2 | 7.171                | 5.55   |

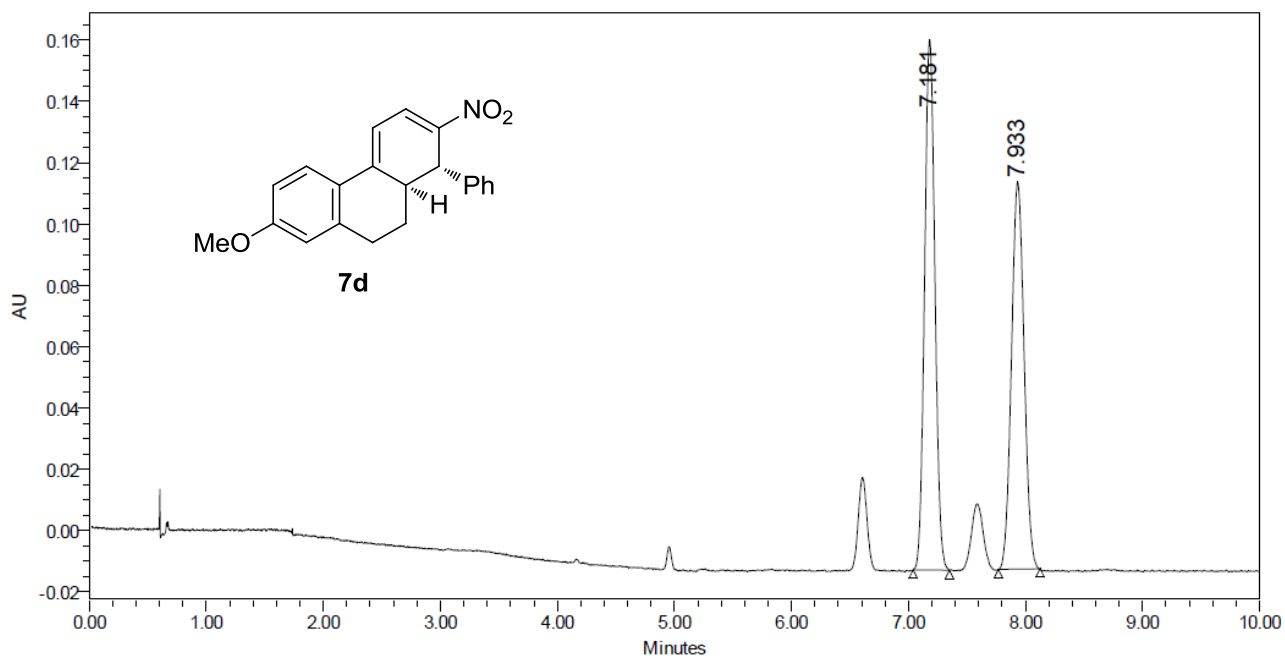

|   | Retention Time (min) | % Area |
|---|----------------------|--------|
| 1 | 7.181                | 52.85  |
| 2 | 7.933                | 47.15  |

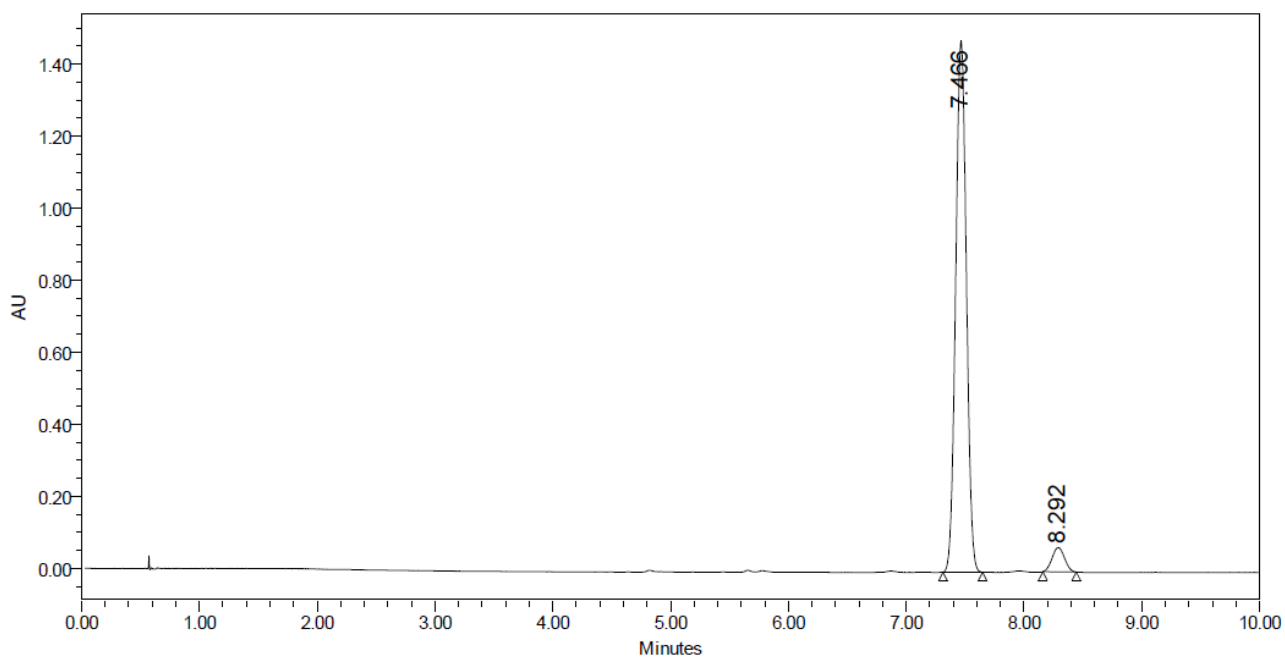

|   | Retention Time (min) | % Area |
|---|----------------------|--------|
| 1 | 7.466                | 94.91  |
| 2 | 8.292                | 5.09   |

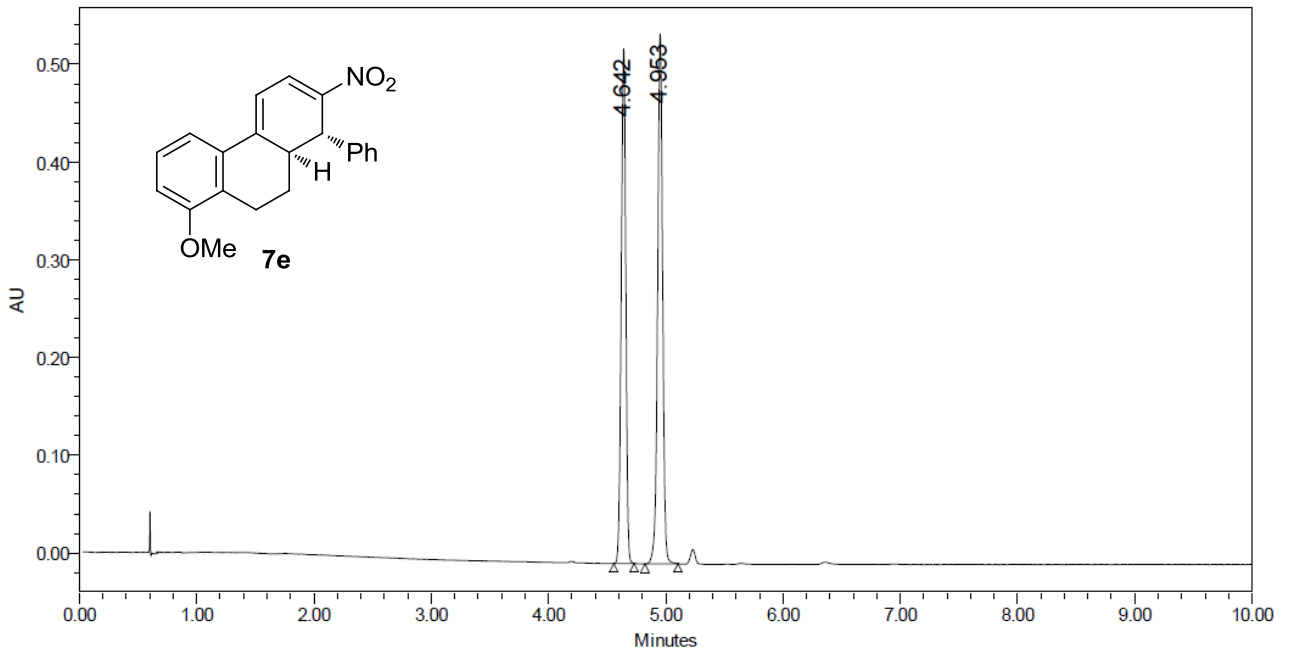

|   | Retention Time (min) | % Area |
|---|----------------------|--------|
| 1 | 4.642                | 46.87  |
| 2 | 4.953                | 53.13  |

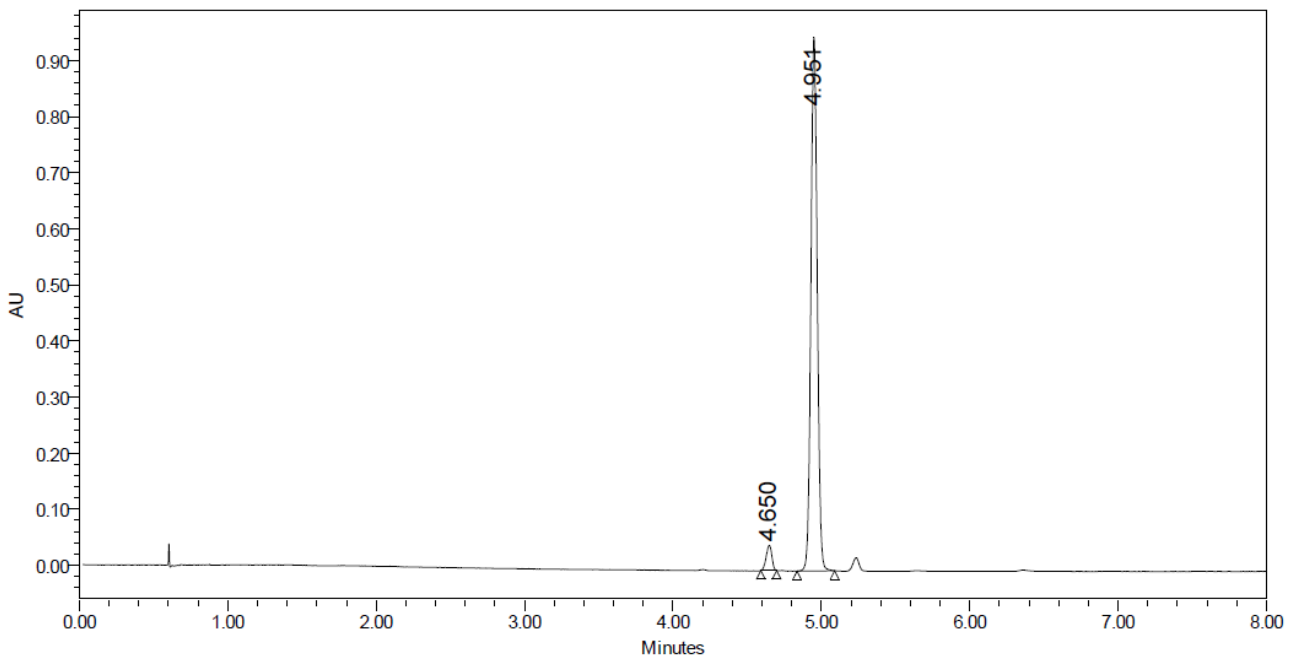

|   | Retention Time (min) | % Area |
|---|----------------------|--------|
| 1 | 4.650                | 4.07   |
| 2 | 4.951                | 95.93  |

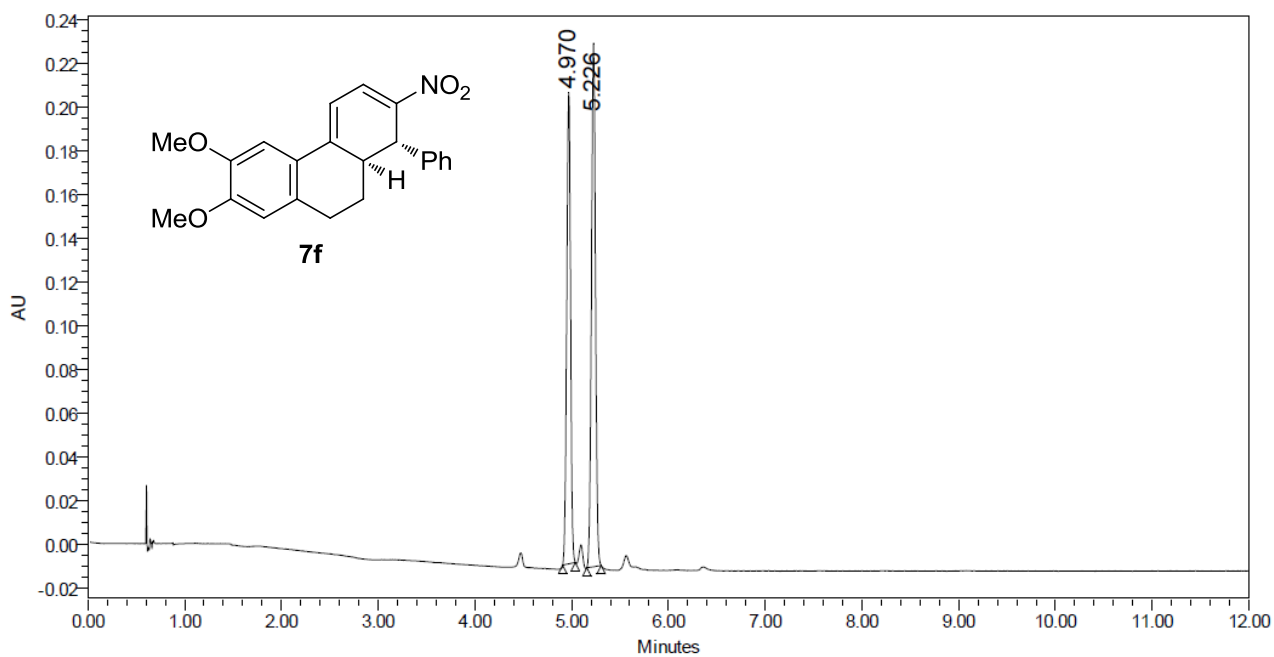

|   | Retention Time (min) | % Area |
|---|----------------------|--------|
| 1 | 4.970                | 45.82  |
| 2 | 5.226                | 54.18  |

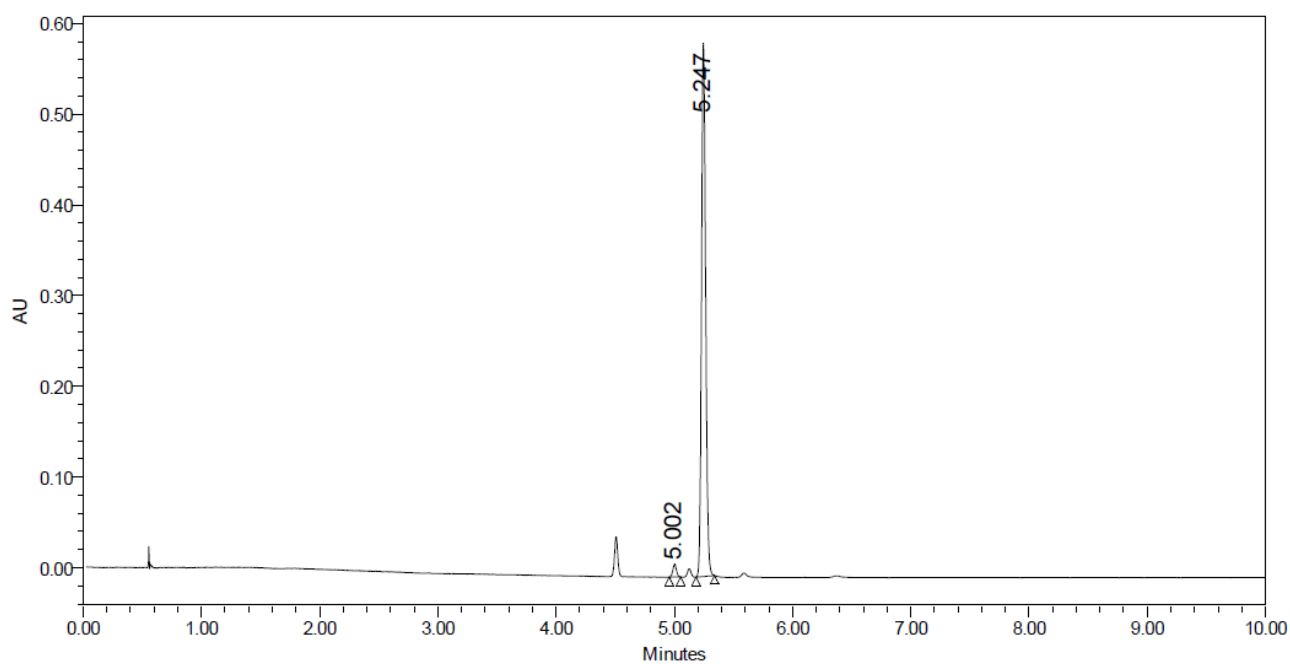

|   | Retention Time (min) | % Area |
|---|----------------------|--------|
| 1 | 5.002                | 2.01   |
| 2 | 5.247                | 97.99  |

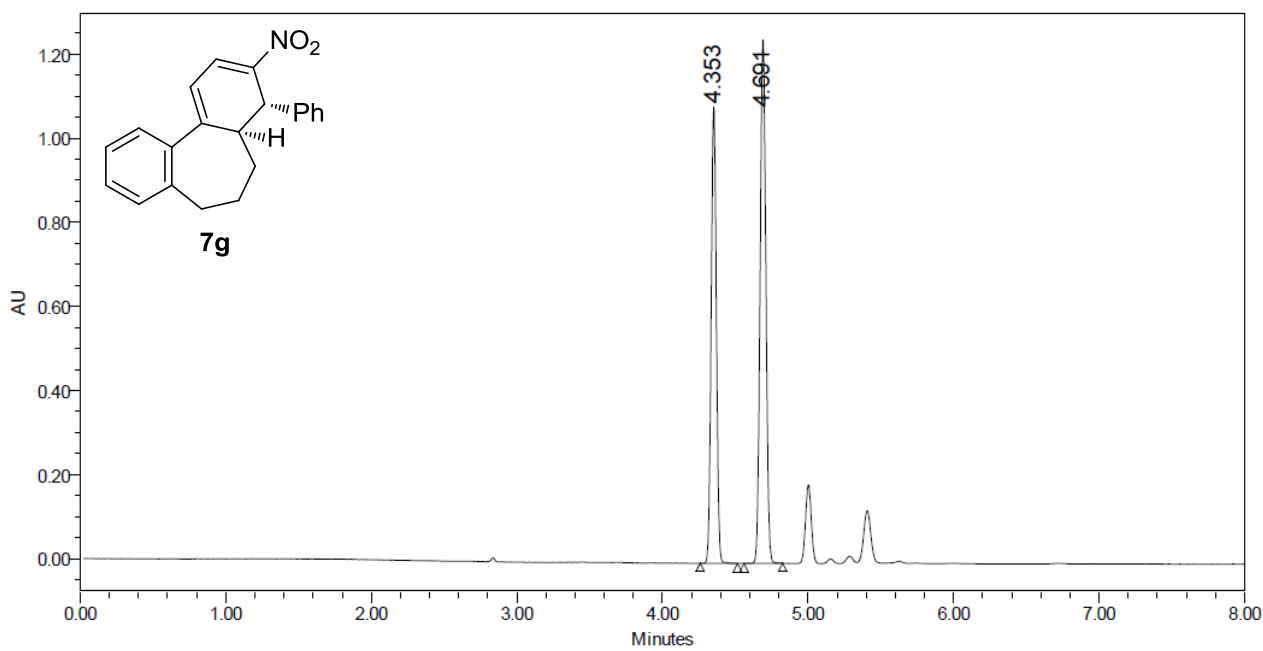

|   | Retention Time (min) | % Area |
|---|----------------------|--------|
| 1 | 4.353                | 44.01  |
| 2 | 4.691                | 55.99  |

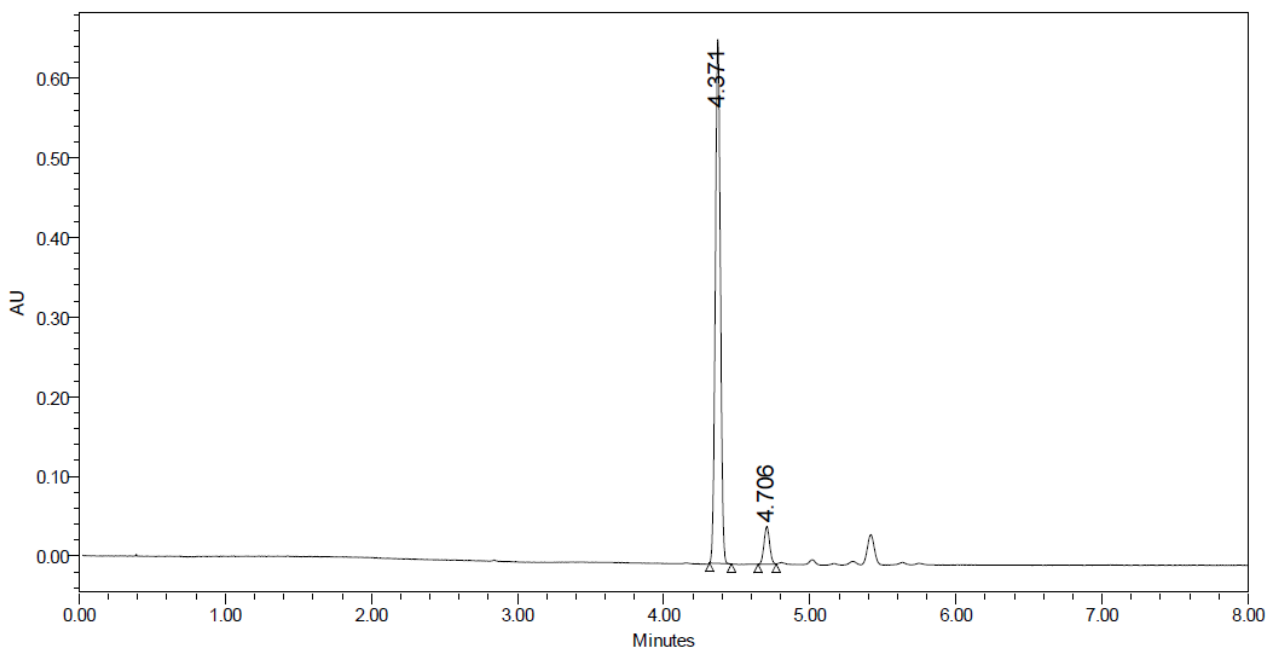

|   | Retention Time (min) | % Area |
|---|----------------------|--------|
| 1 | 4.371                | 92.69  |
| 2 | 4.706                | 7.31   |



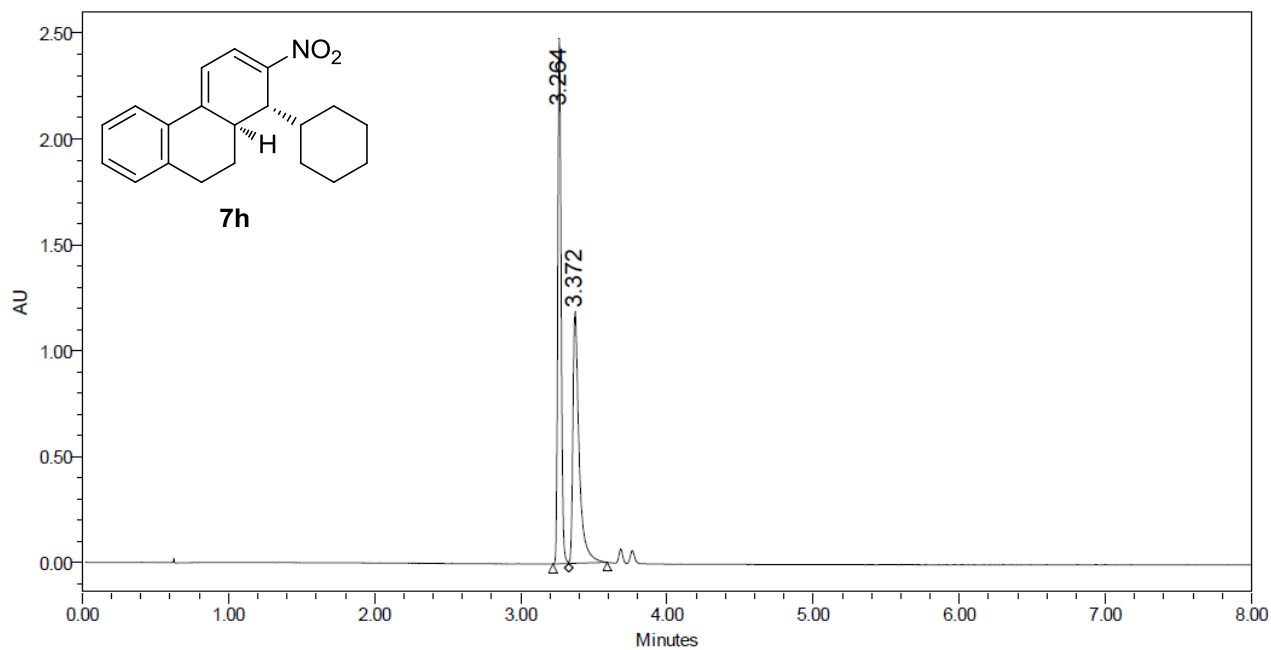

|   | Retention Time (min) | % Area |
|---|----------------------|--------|
| 1 | 3.264                | 52.97  |
| 2 | 3.372                | 47.03  |

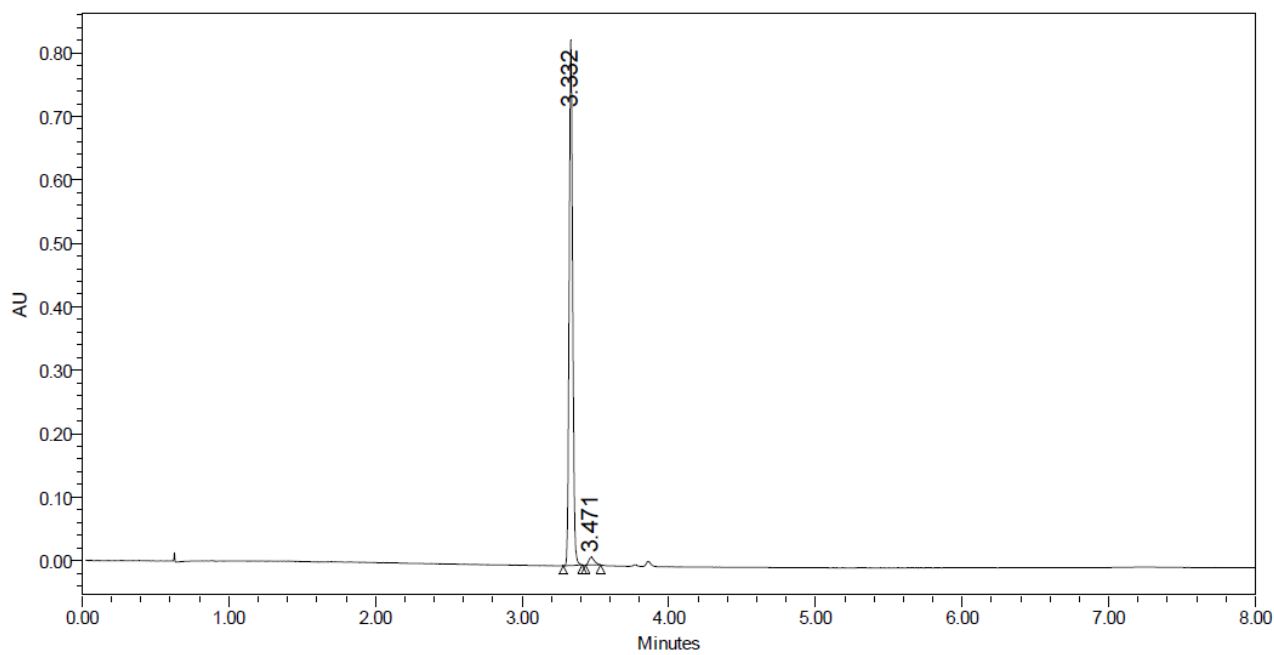

|   | Retention Time (min) | % Area |
|---|----------------------|--------|
| 1 | 3.332                | 97.64  |
| 2 | 3.471                | 2.36   |

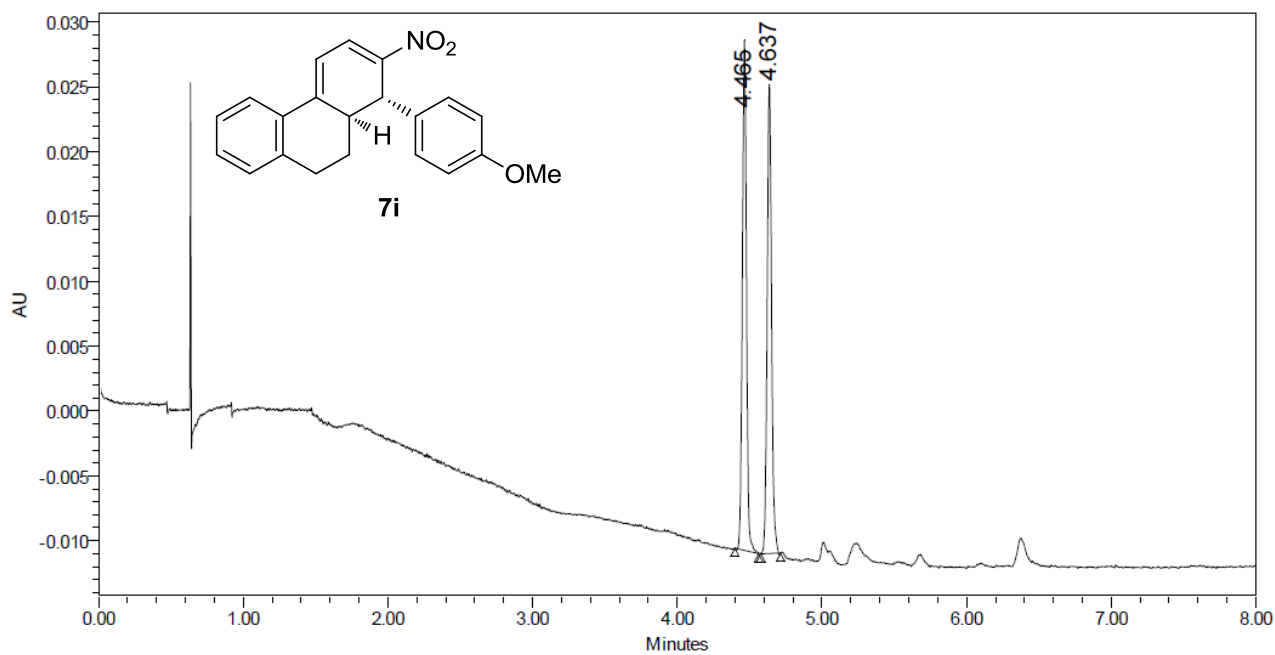

|   | Retention Time (min) | % Area |
|---|----------------------|--------|
| 1 | 4.465                | 50.43  |
| 2 | 4.637                | 49.57  |

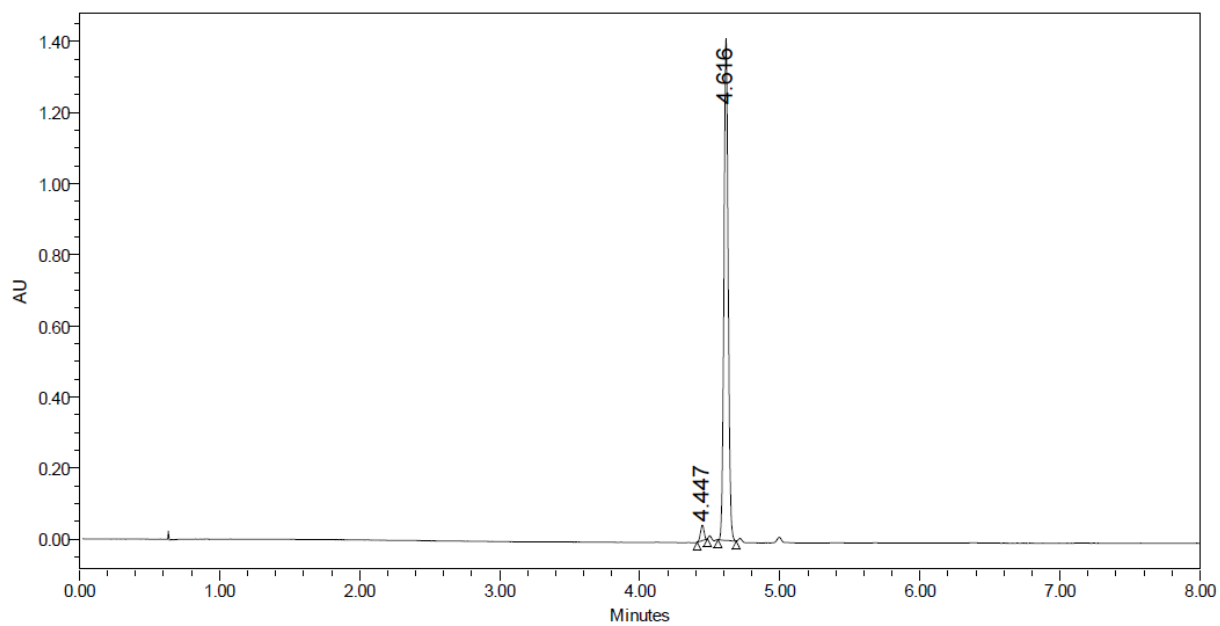

|   | Retention Time (min) | % Area |
|---|----------------------|--------|
| 1 | 4.447                | 2.48   |
| 2 | 4.616                | 97.52  |

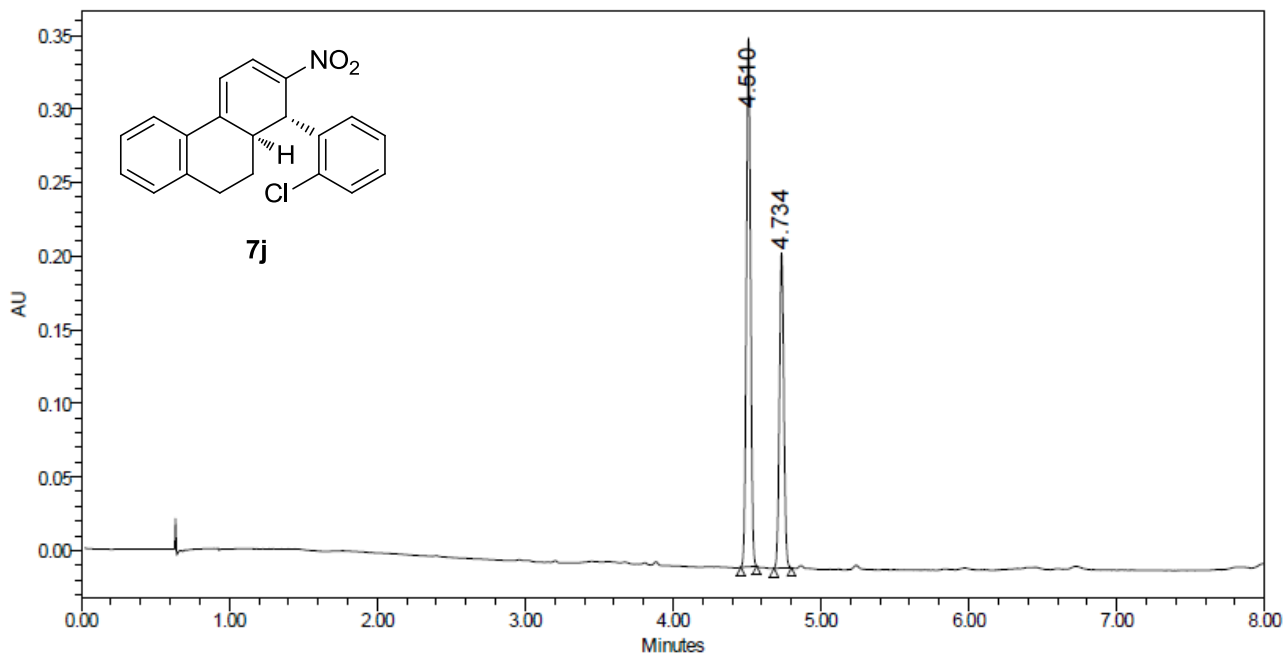

|   | Retention Time (min) | % Area |
|---|----------------------|--------|
| 1 | 4.510                | 61.38  |
| 2 | 4.734                | 38.62  |

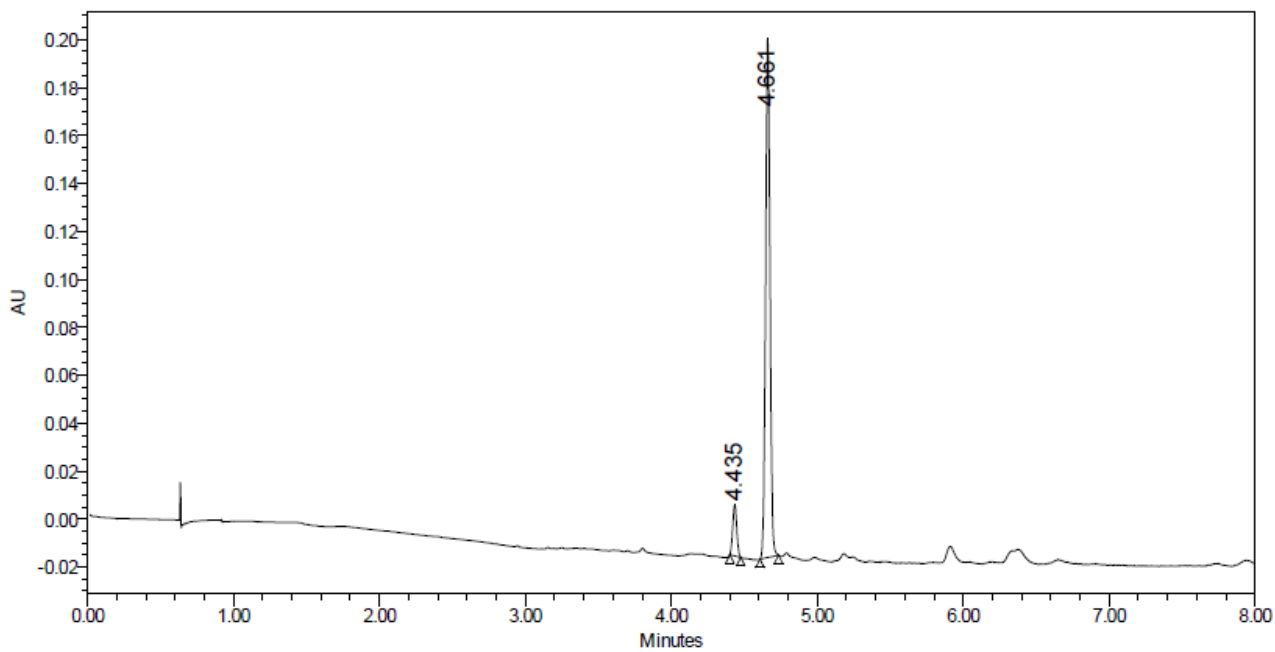

|   | Retention Time (min) | % Area |
|---|----------------------|--------|
| 1 | 4.435                | 8.20   |
| 2 | 4.661                | 91.80  |
